# Supplementary material
Source: bioRxiv or medRxiv preprint supplement (https://www.biorxiv.org/highwire/filestream/21019/field_highwire_adjunct_files/0/031724-1.pdf)
Supplement: Supplementary file [file 031724-1.pdf]

**SUPPLEMENTAL MATERIAL: ESTIMATING ERROR MODELS FOR WHOLE GENOME SEQUENCING USING MIXTURES OF DIRICHLET-MULTINOMIAL DISTRIBUTIONS**

Steven H. Wu<sup>1</sup>, Rachel S. Schwartz<sup>1,3</sup>, David J. Winter<sup>1</sup>, Donald F. Conrad<sup>4</sup>, Reed A. Cartwright<sup>1,2\*</sup>

<sup>1</sup>The Biodesign Institute, and <sup>2</sup>School of Life Sciences, Arizona State University, Tempe, AZ, 85281, USA; <sup>3</sup>Department of Biological Sciences, The University of Rhode Island, Kingston, RI 02881, USA; <sup>4</sup>Department of Genetics, Department of Pathology and Immunology, Washington University School of Medicine, Saint Louis, MO, 63110, USA

\*To whom correspondence should be addressed. Tel: +1 480-965-9949; Email: cartwright@asu.edu

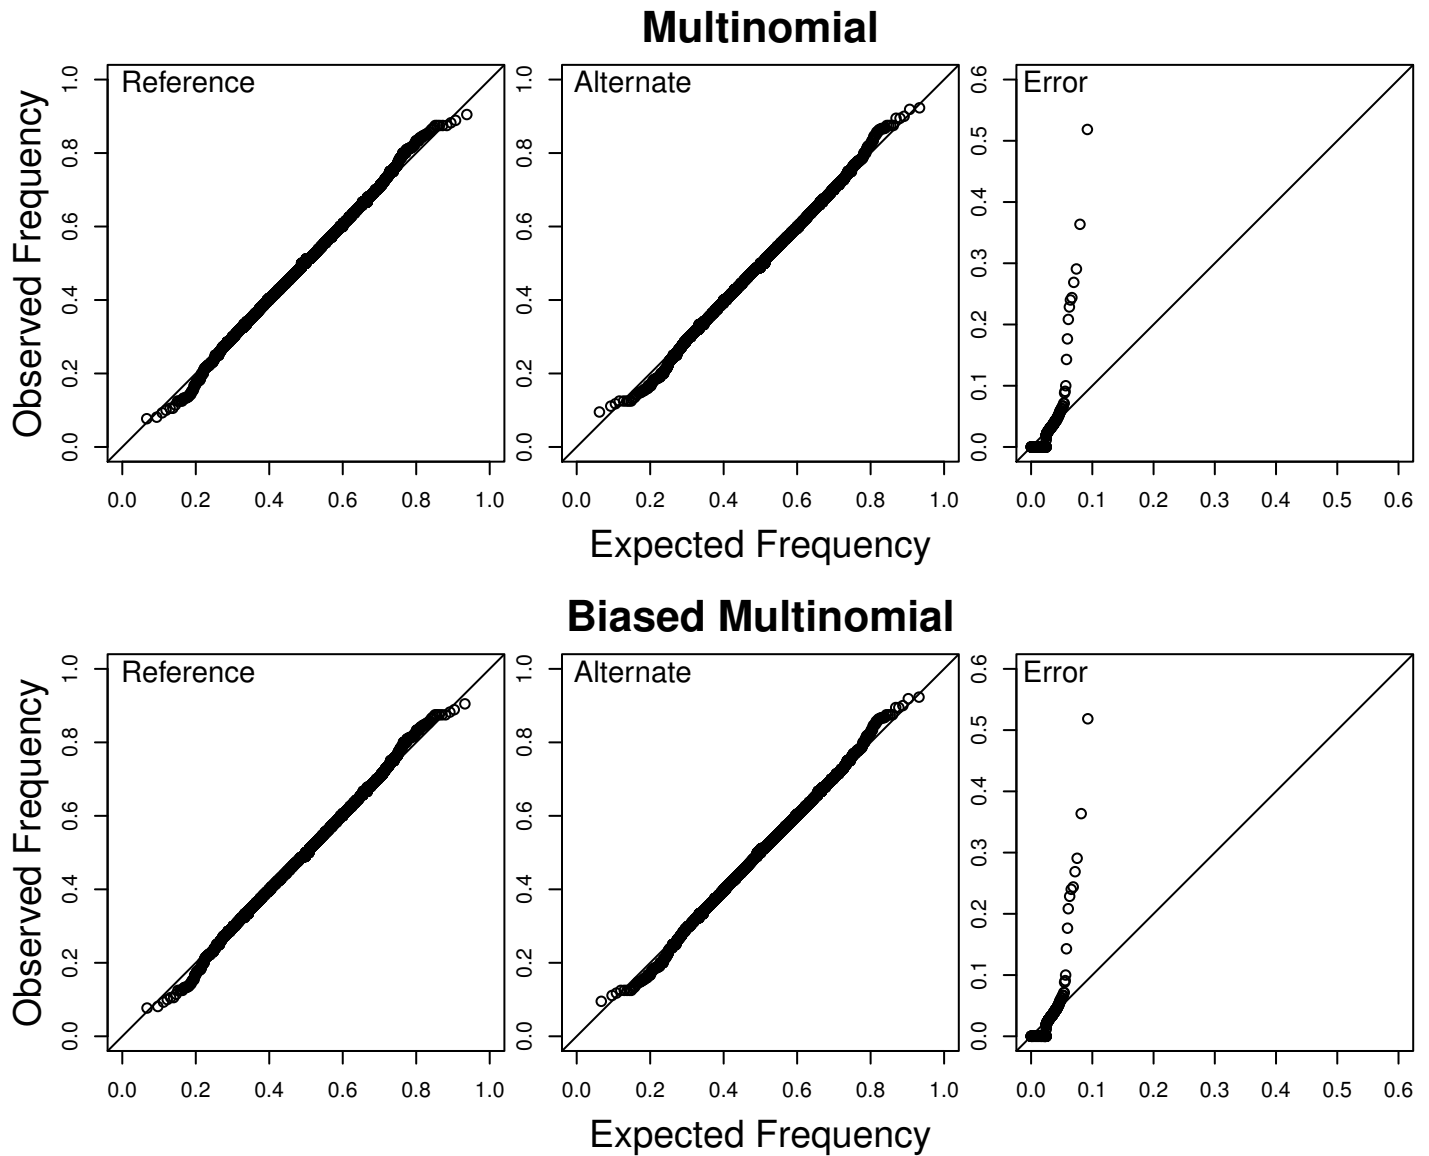

Figure S1: **Mixtures of Dirichlet-multinomials provide the best fits to genomic data: CEU13 Chr10 TH.** QQ plots evaluating the fits of several model to this dataset. The quantiles of the observed read count frequencies are calculated from the datasets, and the quantiles of the expected read count frequencies are estimated from the fitted model. A model that fits the data well produces points that fall along the diagonal.

## Dirichlet-Multinomial

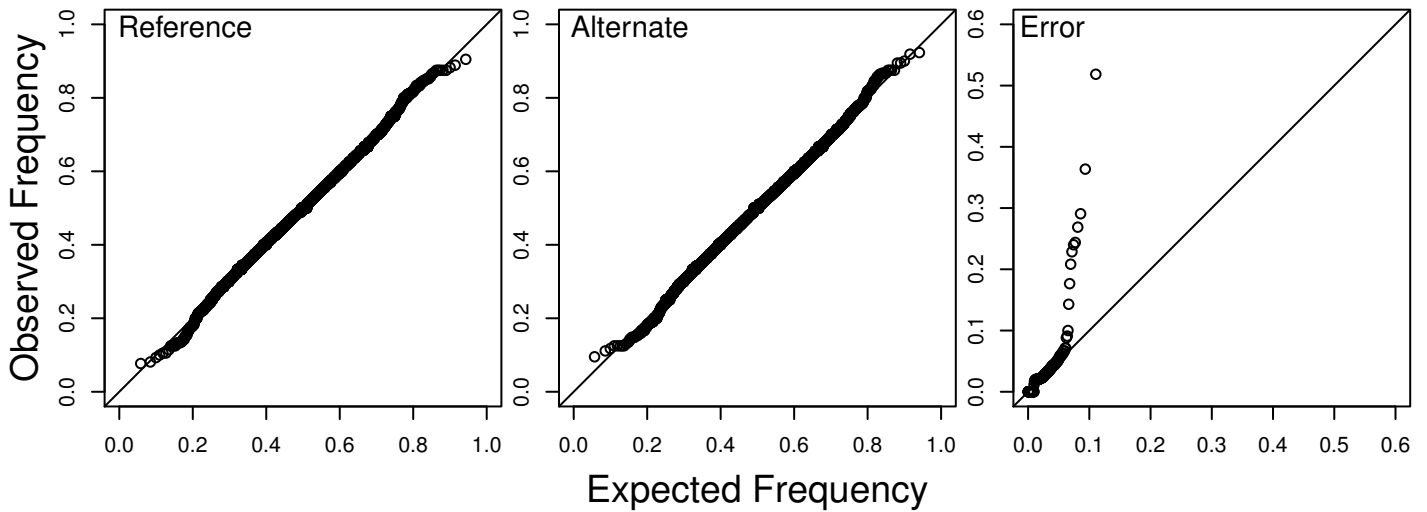

## Mixture of 2 Dirichlet-Multinomials

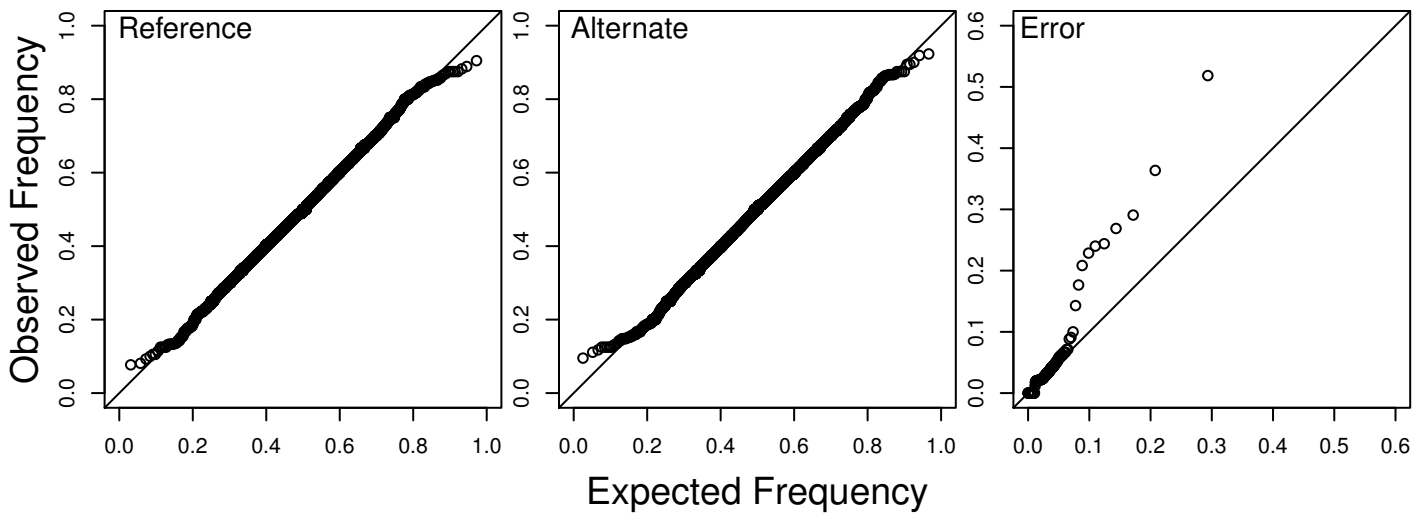

## Mixture of 3 Dirichlet-Multinomials

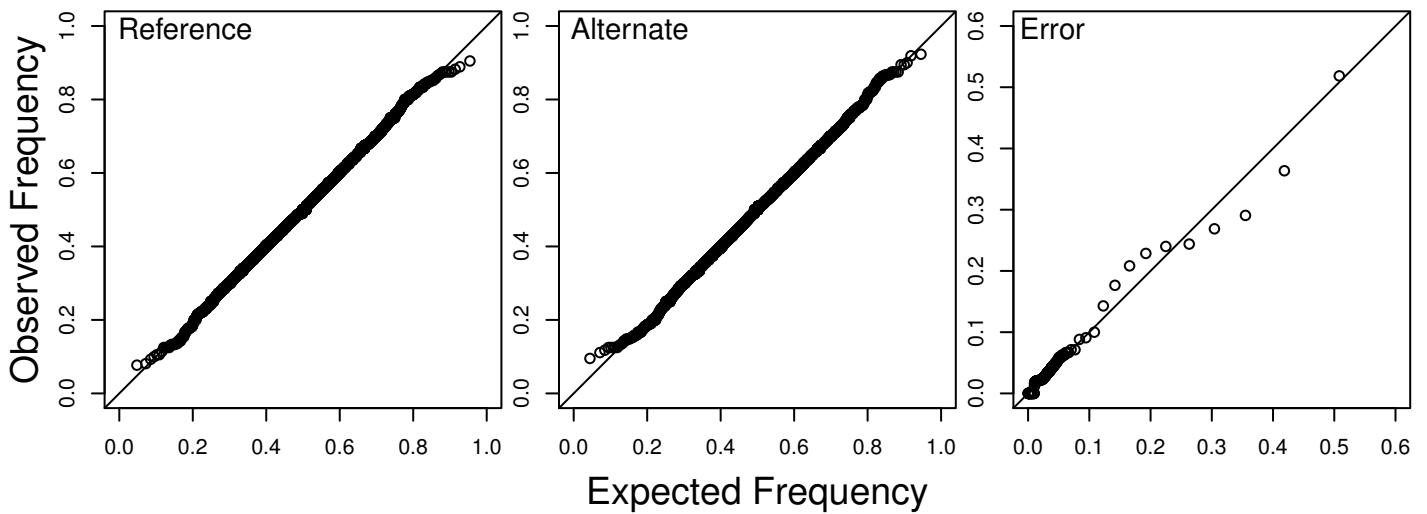

Figure S1 (Continued): **Mixtures of Dirichlet-multinomials provide the best fits to genomic data: CEU13 Chr10 TH.**

### Mixture of 4 Dirichlet-Multinomials

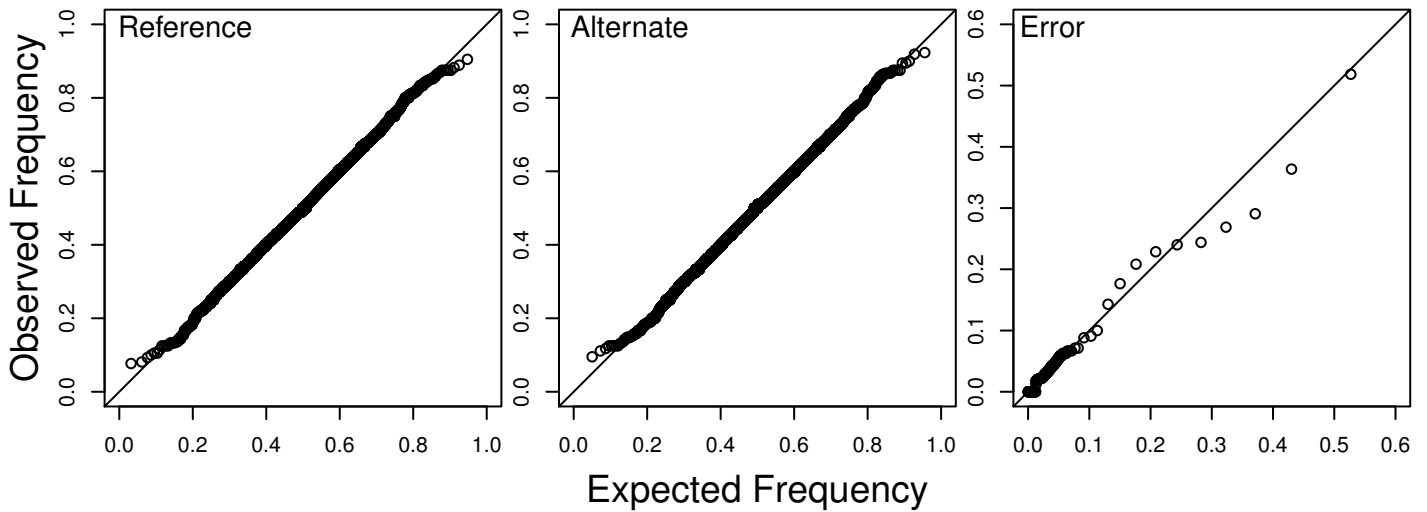

### Mixture of 5 Dirichlet-Multinomials

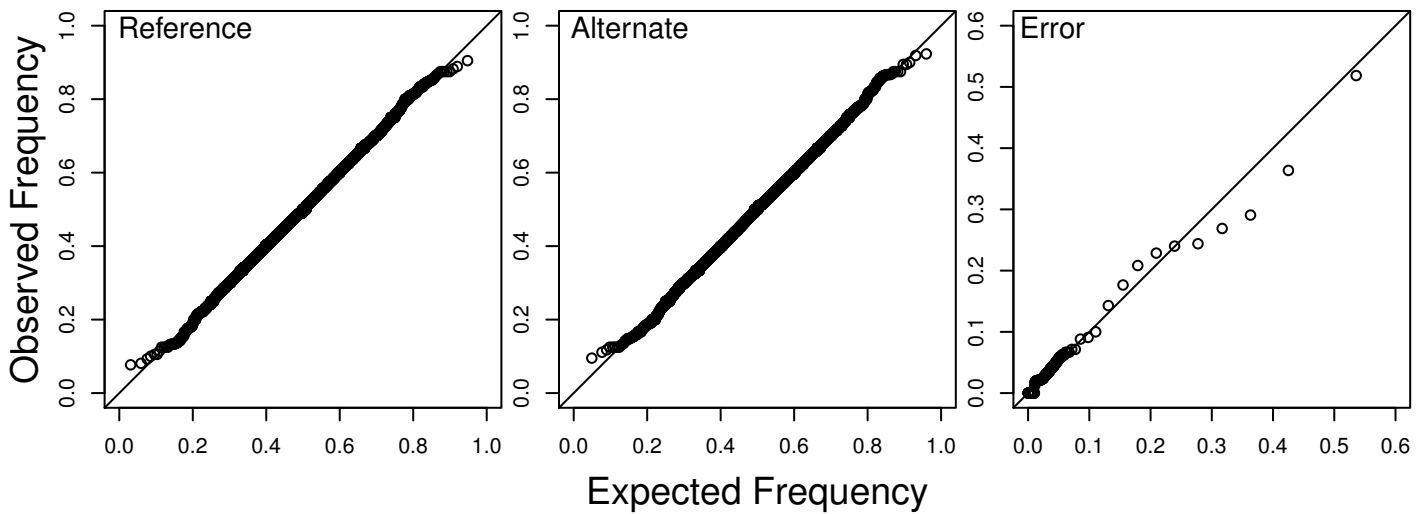

### Mixture of 6 Dirichlet-Multinomials

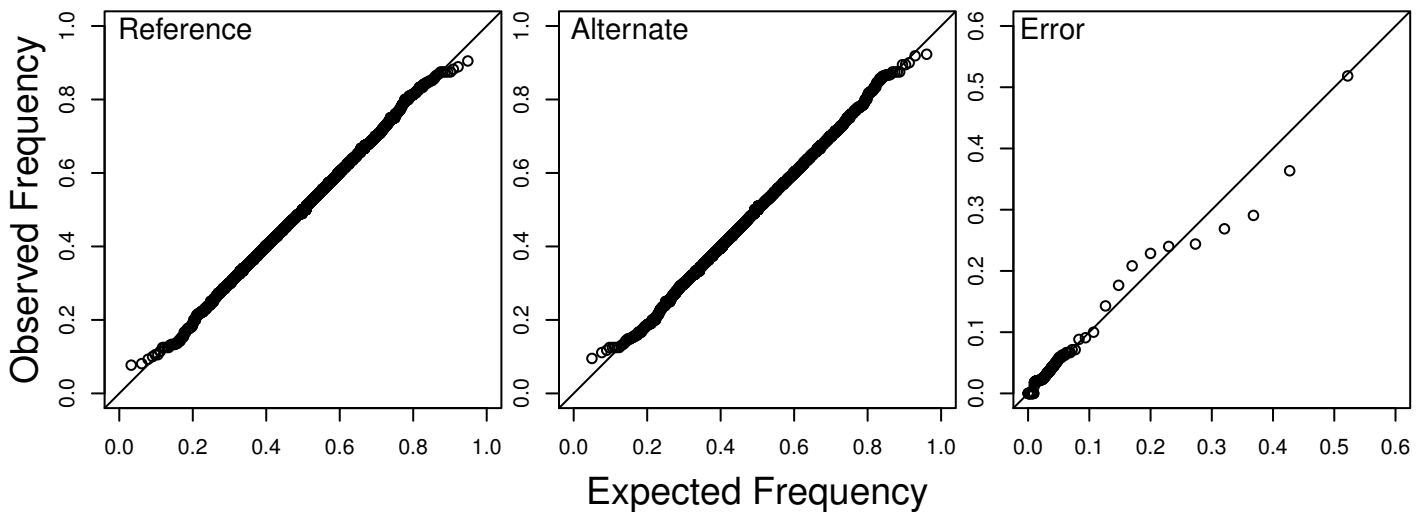

Figure S1 (Continued): **Mixtures of Dirichlet-multinomials provide the best fits to genomic data: CEU13 Chr10 TH.**

## Multinomial

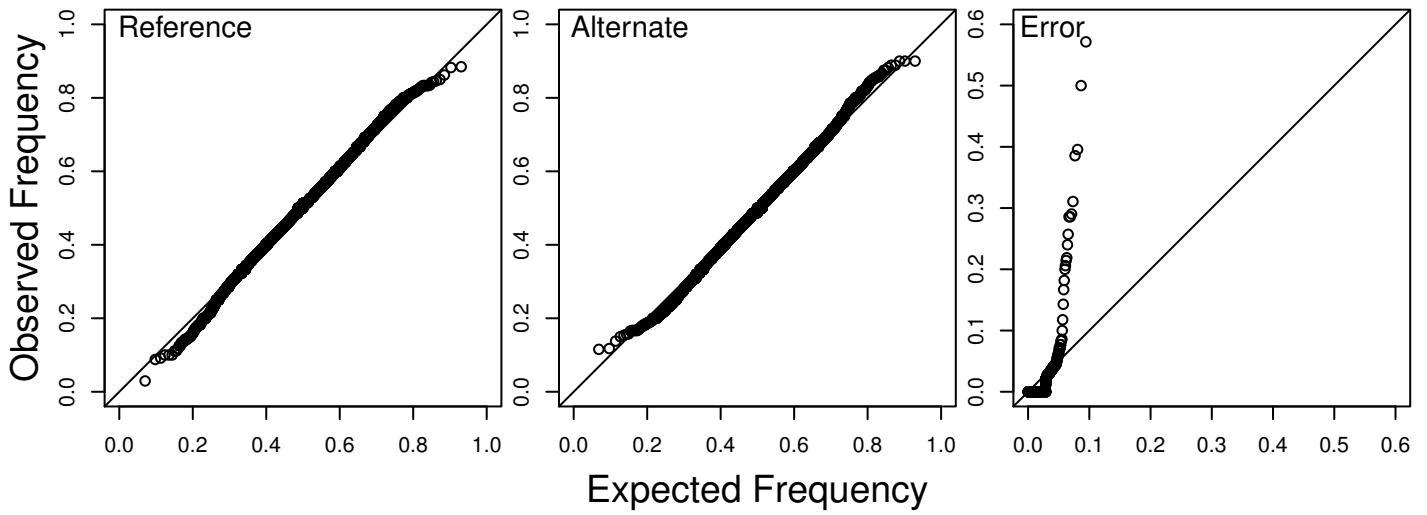

## Biased Multinomial

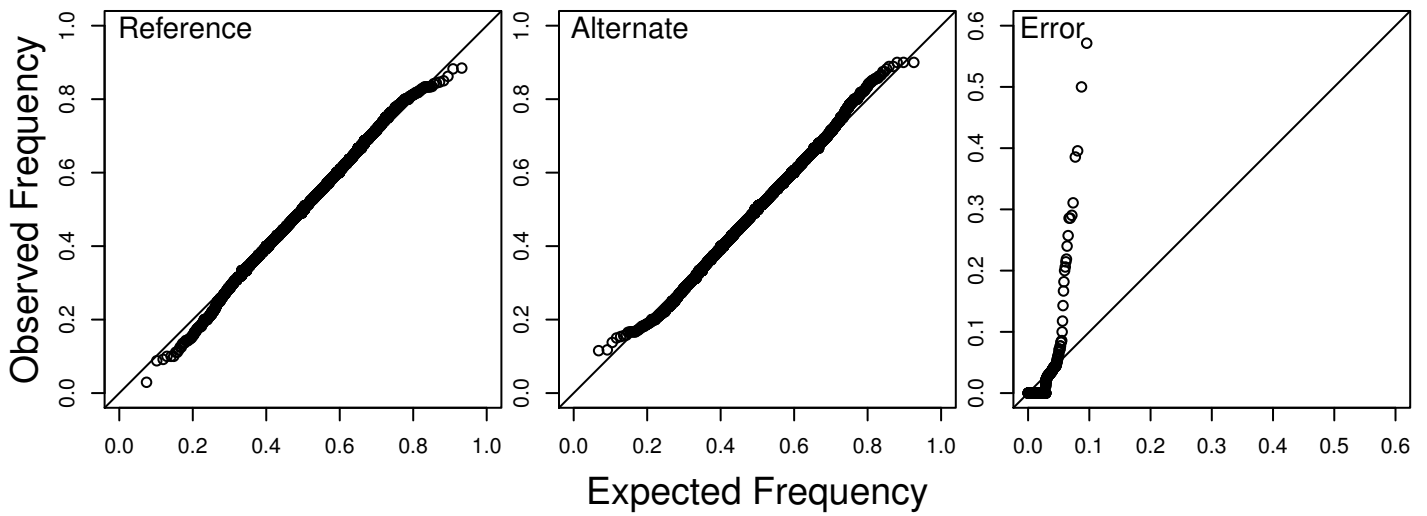

## Dirichlet-Multinomial

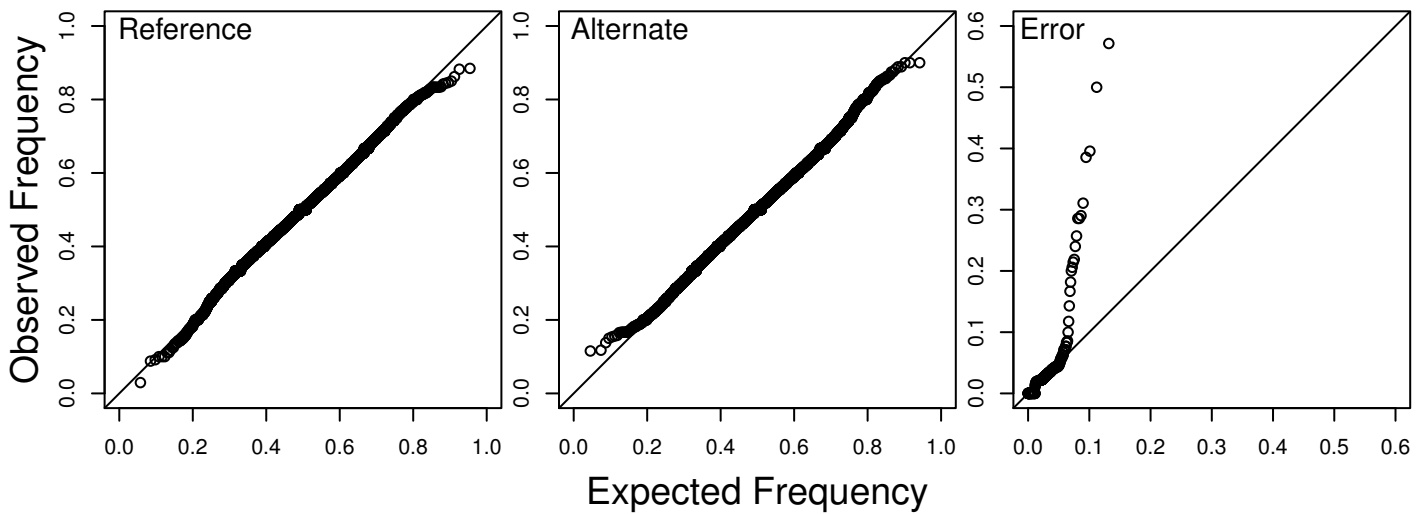

Figure S2: Mixtures of Dirichlet-multinomials provide the best fits to genomic data: CEU13 Chr21 TH.

### Mixture of 2 Dirichlet-Multinomials

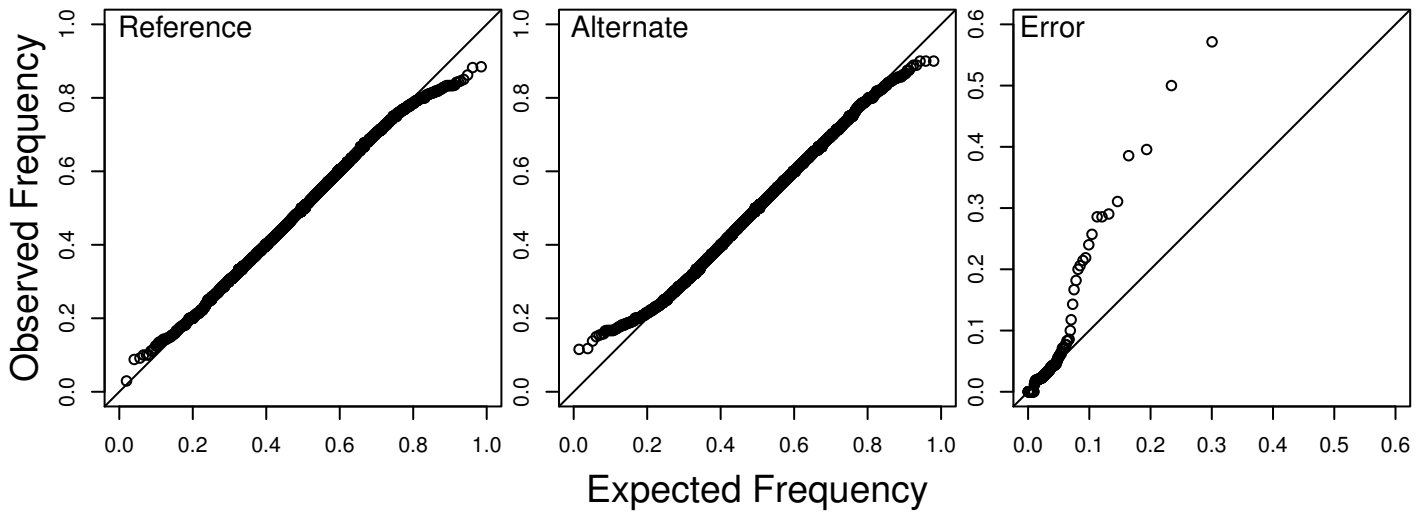

### Mixture of 3 Dirichlet-Multinomials

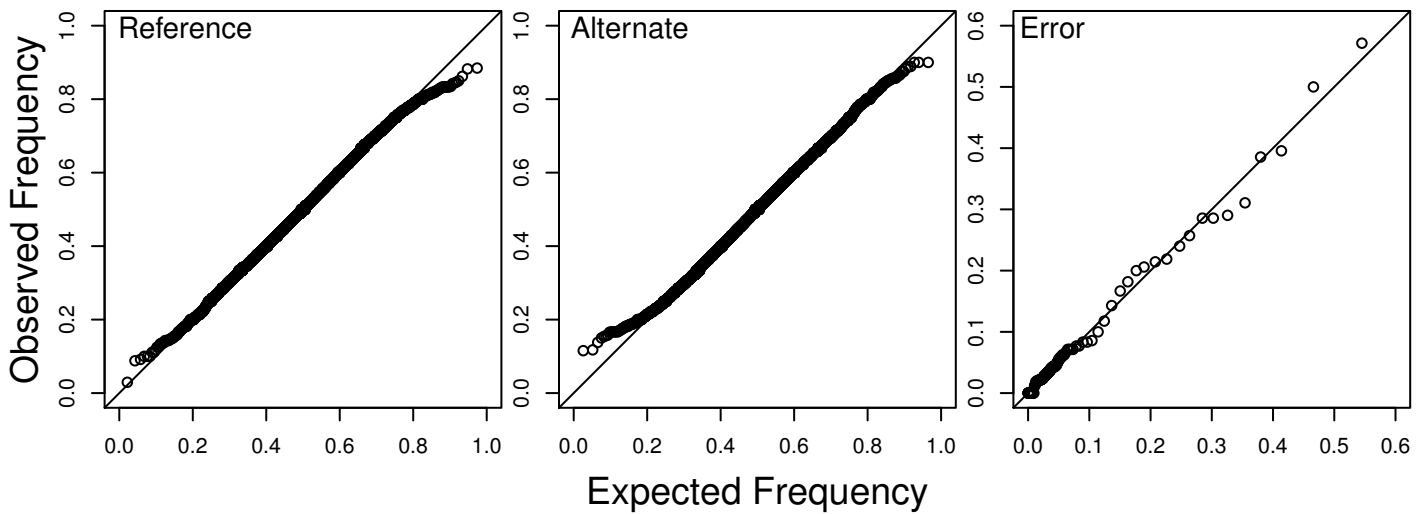

### Mixture of 4 Dirichlet-Multinomials

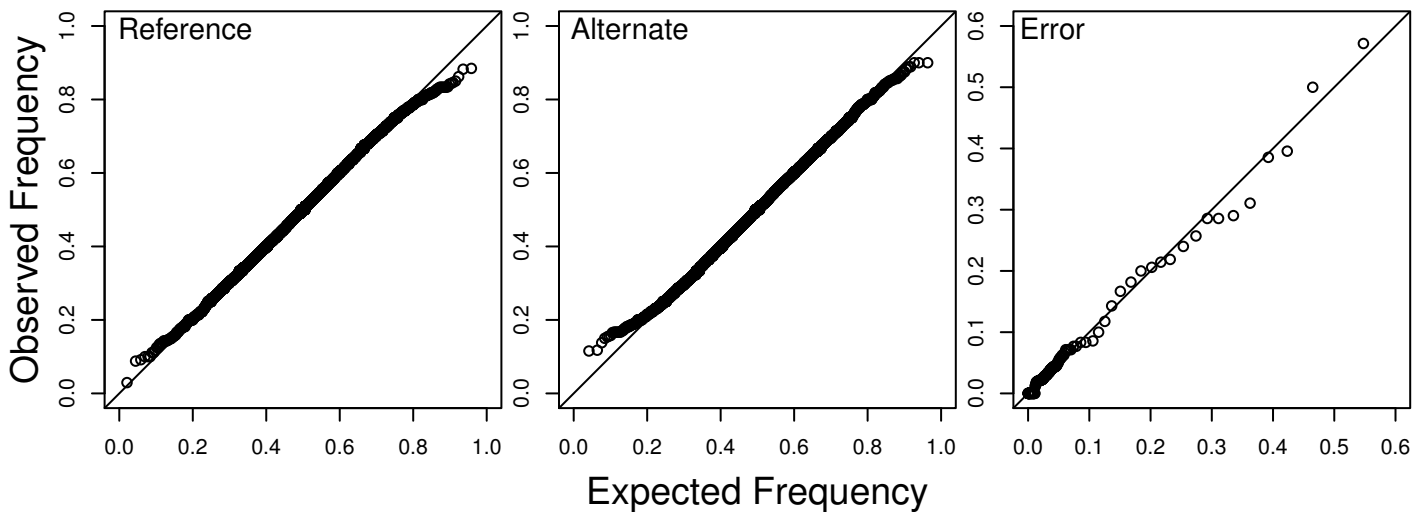

Figure S2 (Continued): **Mixtures of Dirichlet-multinomials provide the best fits to genomic data: CEU13 Chr21 TH.**

### Mixture of 5 Dirichlet–Multinomials

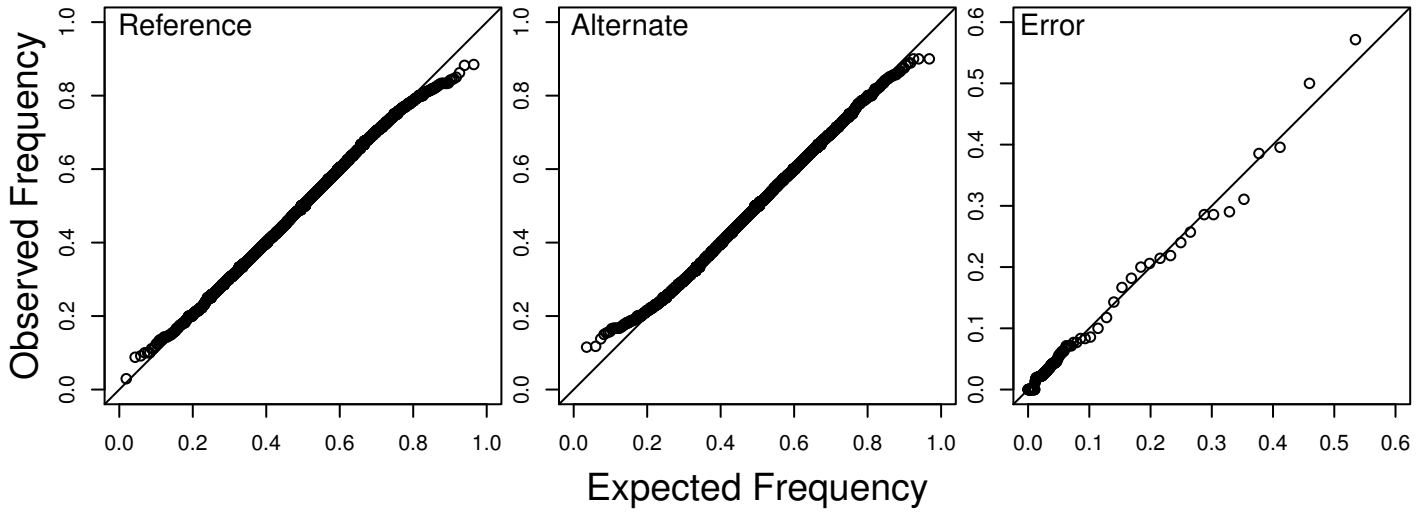

### Mixture of 6 Dirichlet–Multinomials

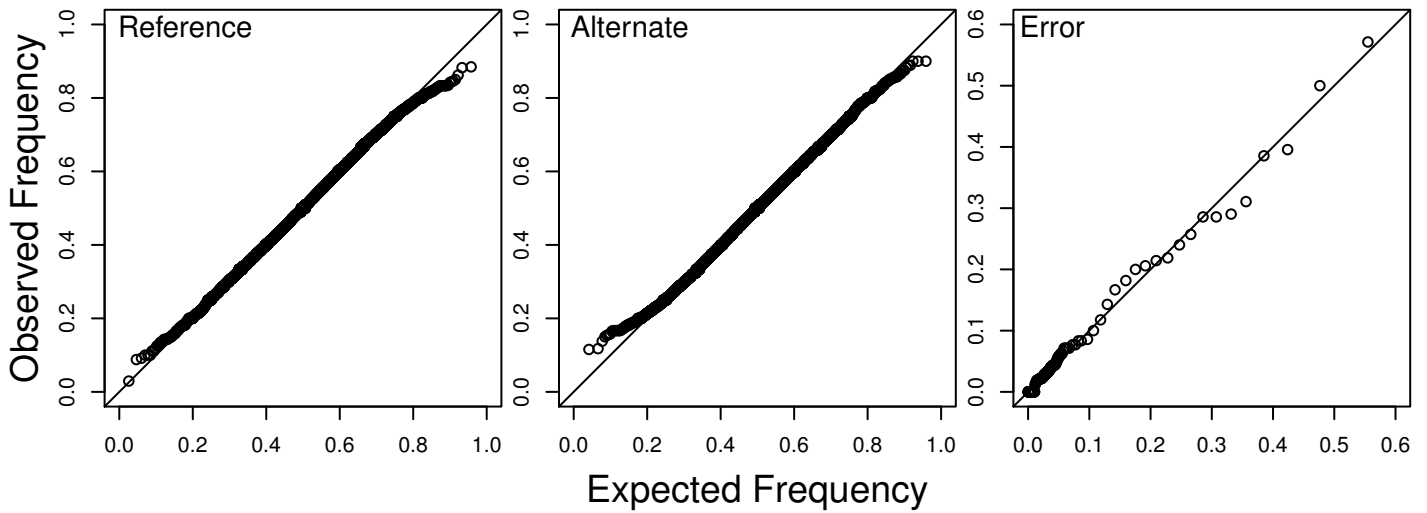

Figure S2 (Continued): **Mixtures of Dirichlet-multinomials provide the best fits to genomic data: CEU13 Chr21 TH.**

## Multinomial

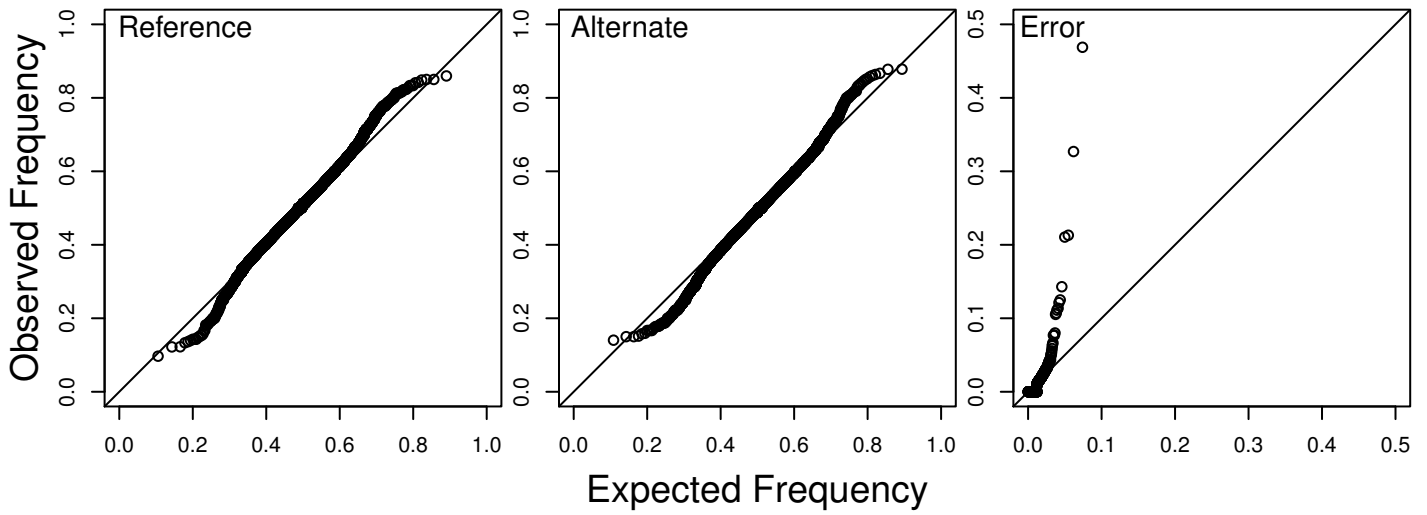

## Biased Multinomial

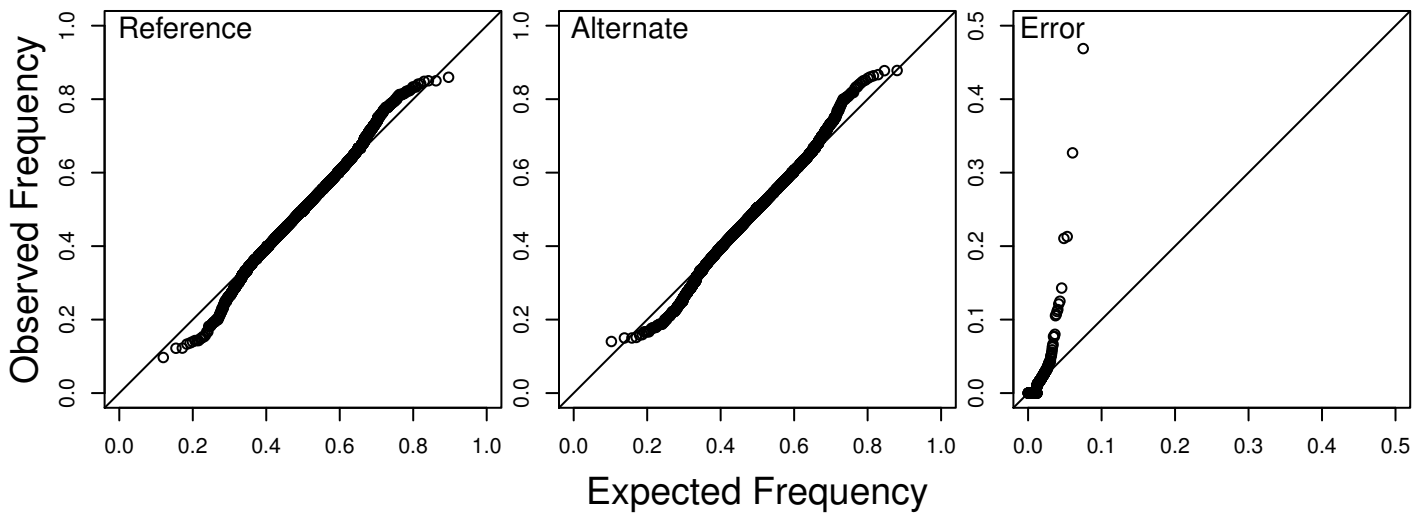

## Dirichlet-Multinomial

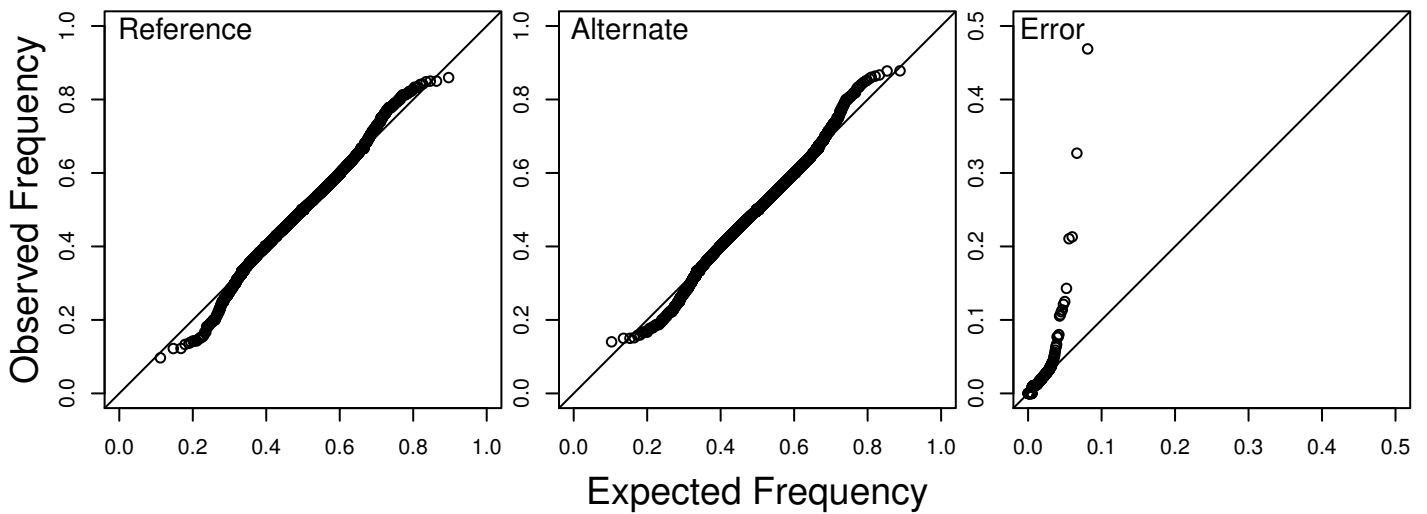

Figure S3: Mixtures of Dirichlet-multinomials provide the best fits to genomic data: CEU12 Chr10 TH.

### Mixture of 2 Dirichlet-Multinomials

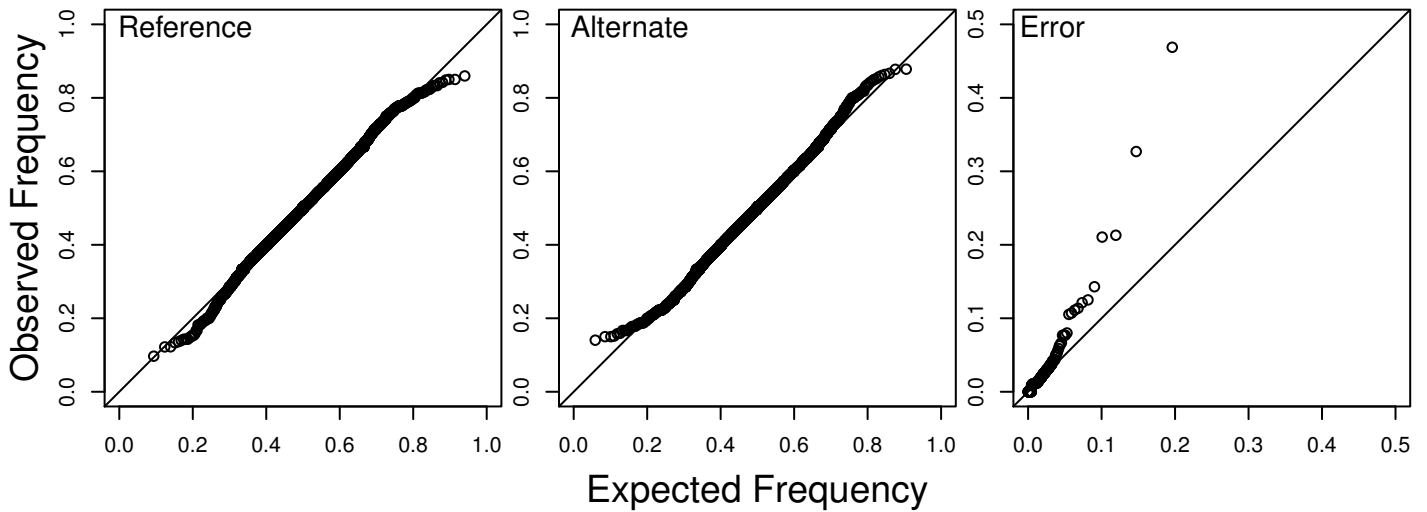

### Mixture of 3 Dirichlet-Multinomials

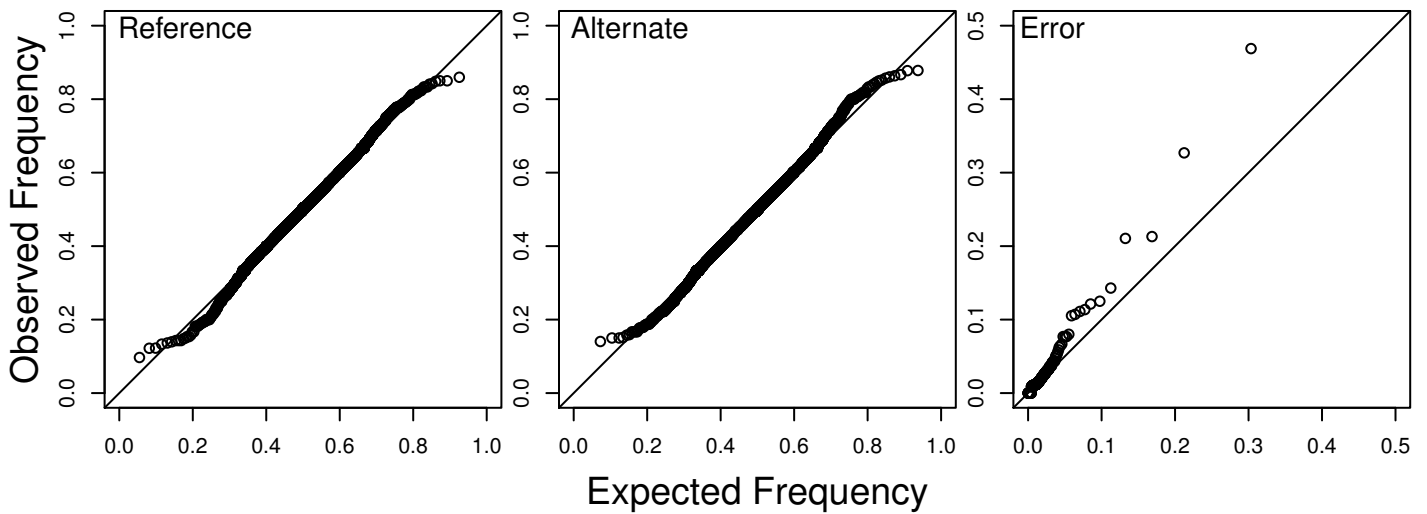

### Mixture of 4 Dirichlet-Multinomials

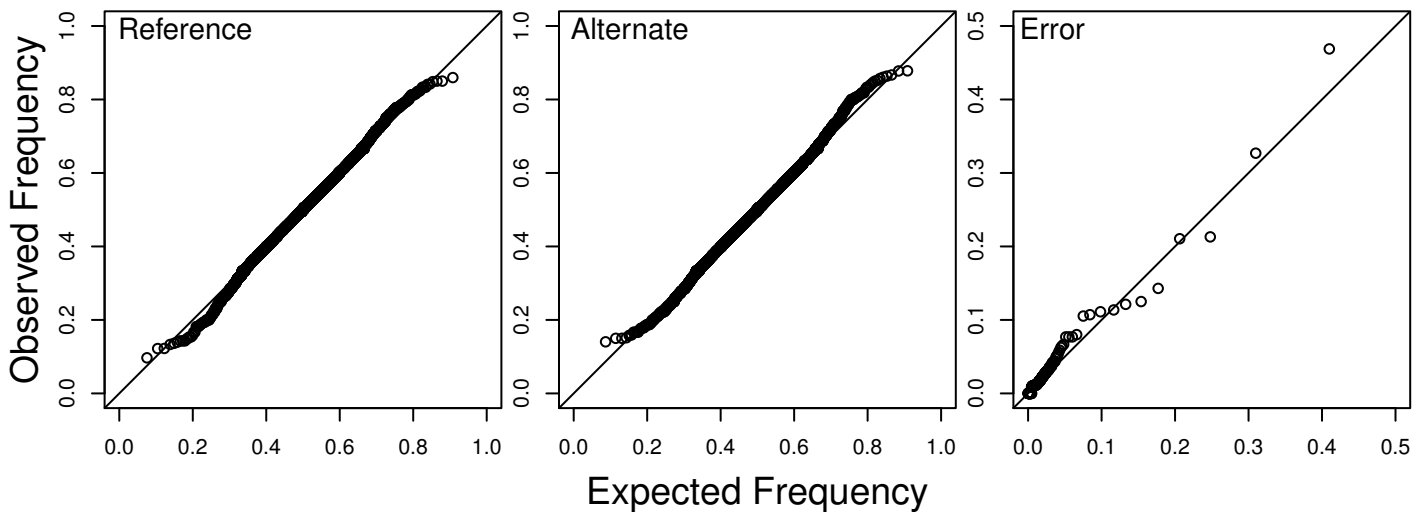

Figure S3 (Continued): **Mixtures of Dirichlet-multinomials provide the best fits to genomic data: CEU12 Chr10 TH.**



### Mixture of 5 Dirichlet–Multinomials

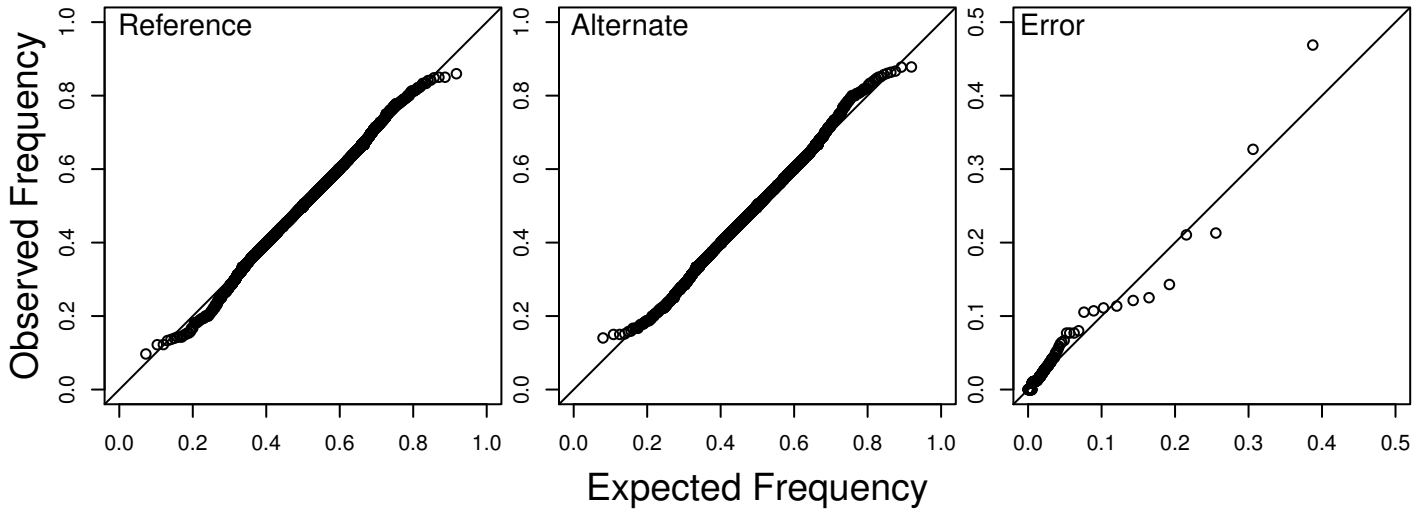

### Mixture of 6 Dirichlet–Multinomials

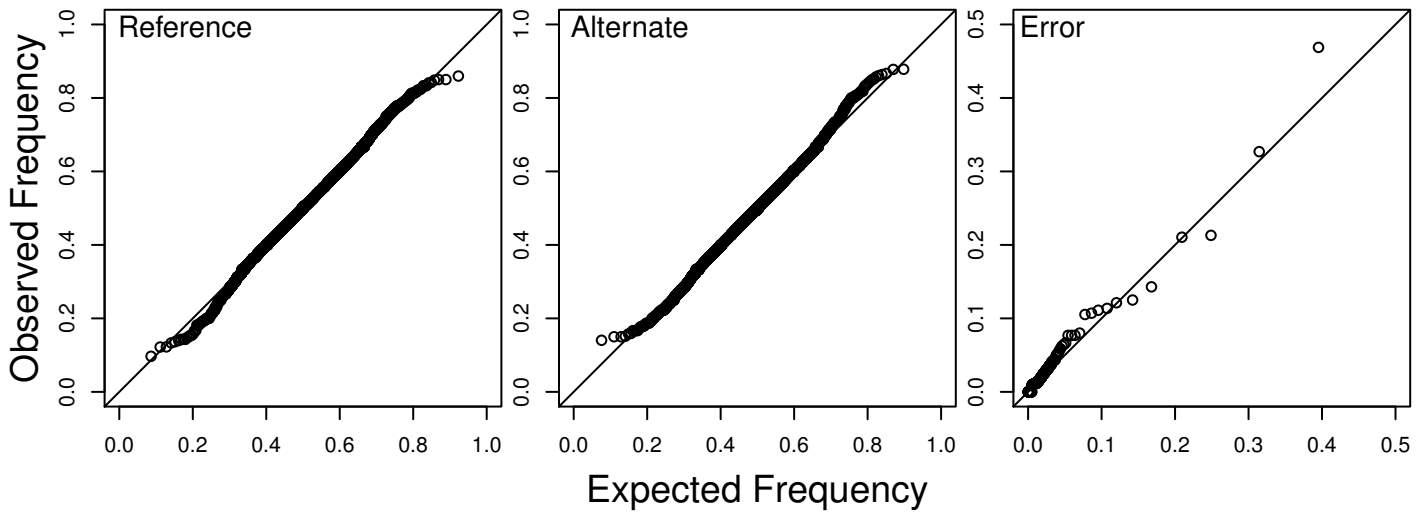

Figure S3 (Continued): **Mixtures of Dirichlet-multinomials provide the best fits to genomic data: CEU12 Chr10 TH.**

## Multinomial

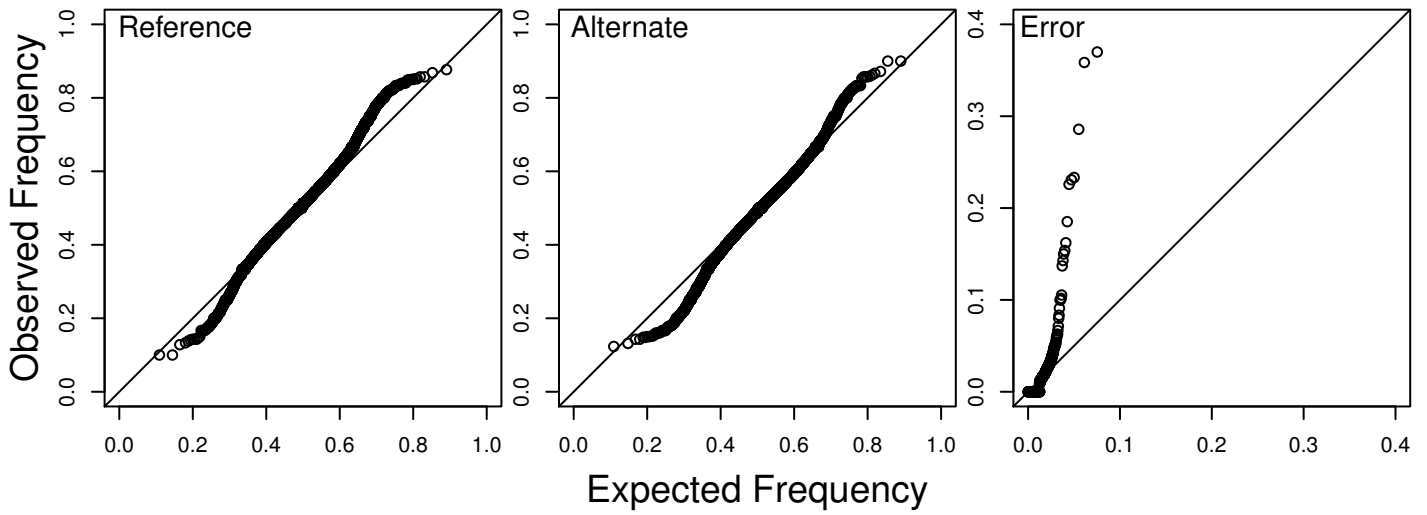

## Biased Multinomial

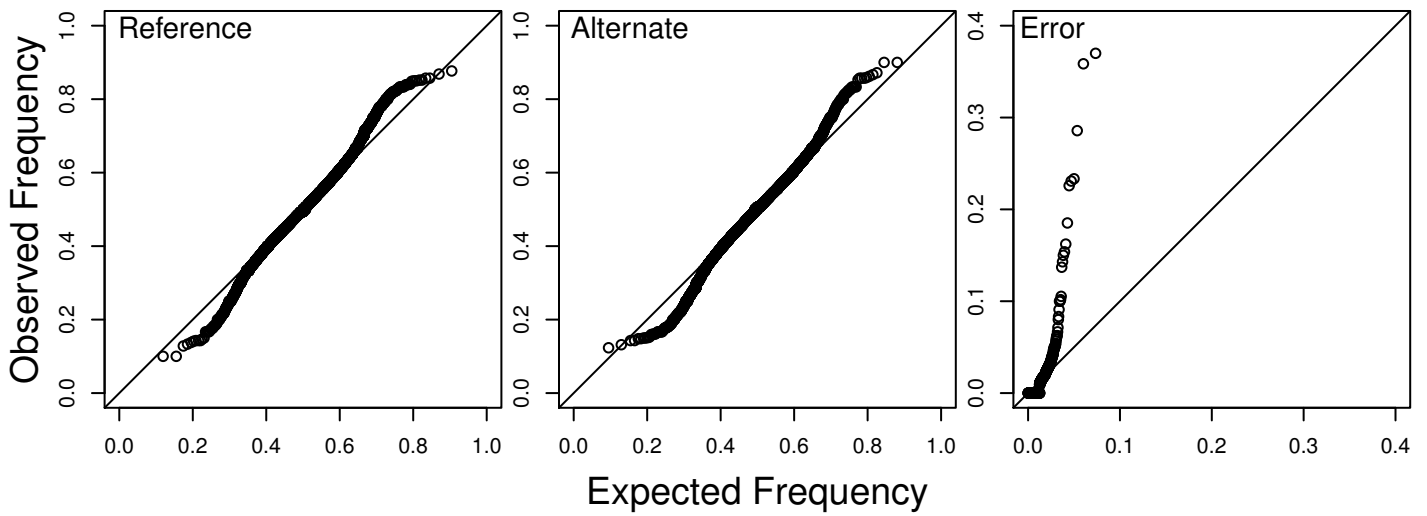

## Dirichlet-Multinomial

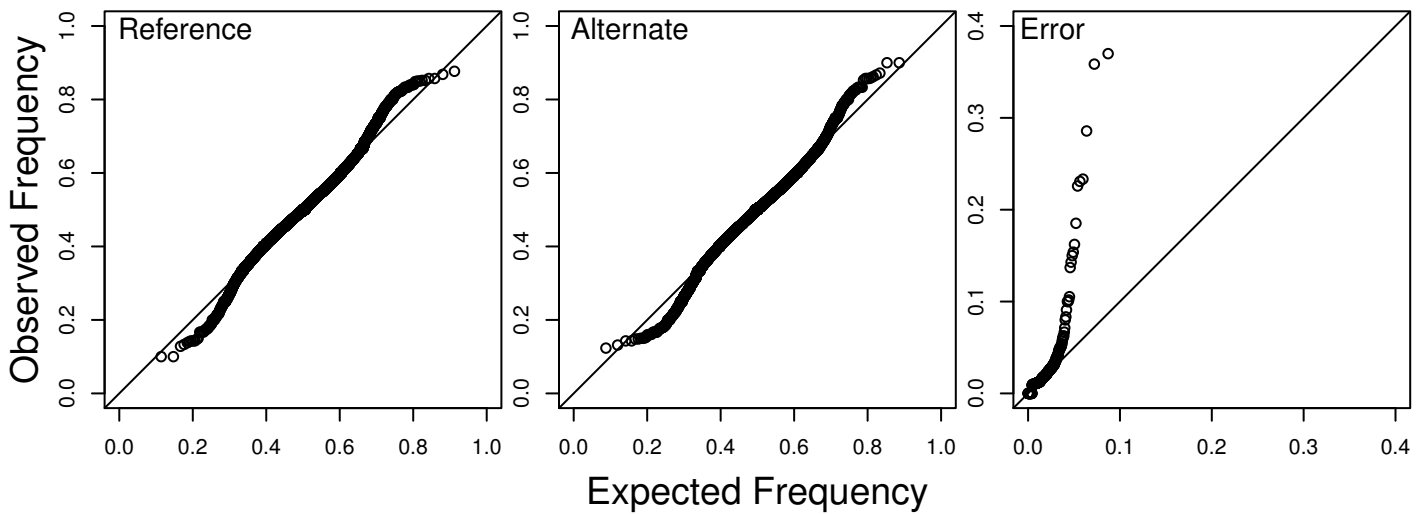

Figure S4: Mixtures of Dirichlet-multinomials provide the best fits to genomic data: CEU12 Chr21 TH.

### Mixture of 2 Dirichlet-Multinomials

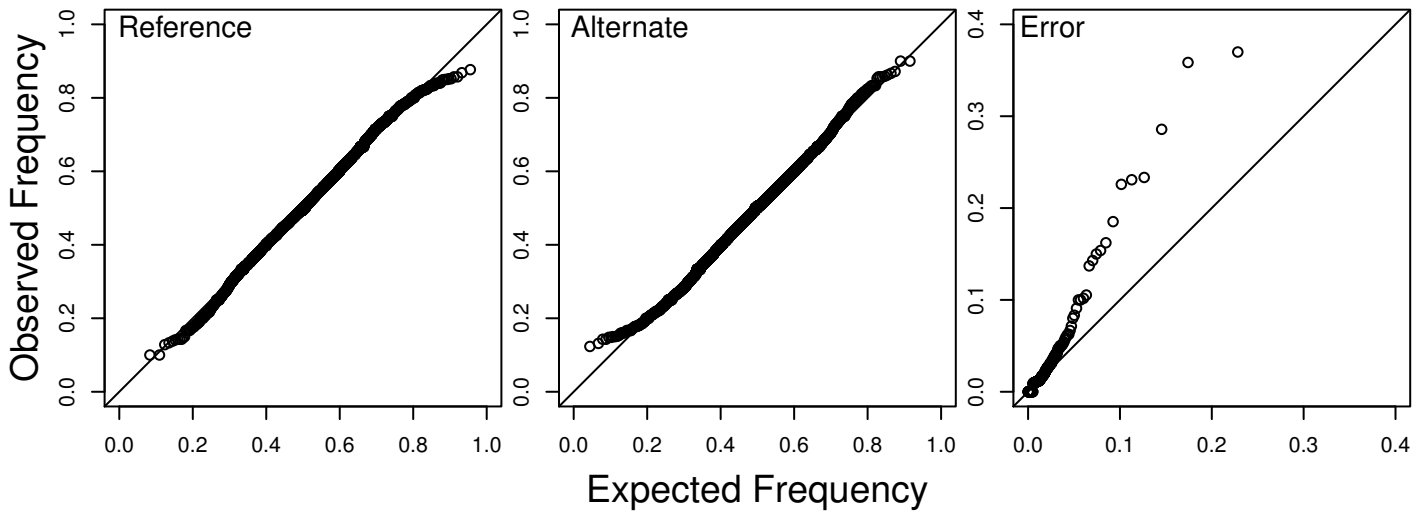

### Mixture of 3 Dirichlet-Multinomials

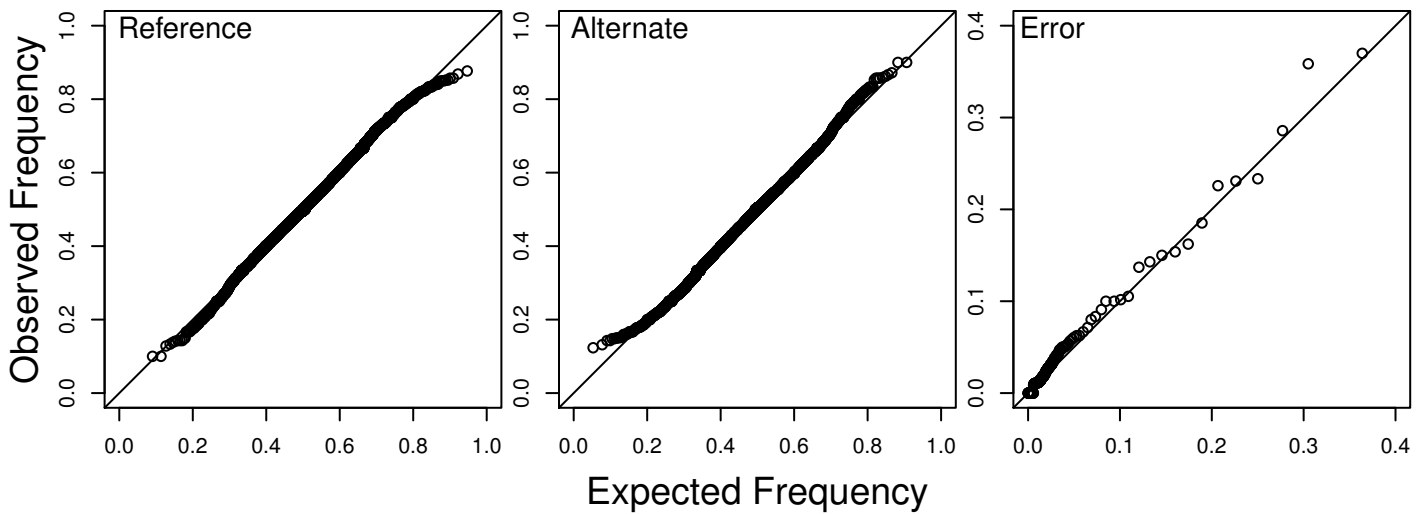

### Mixture of 4 Dirichlet-Multinomials

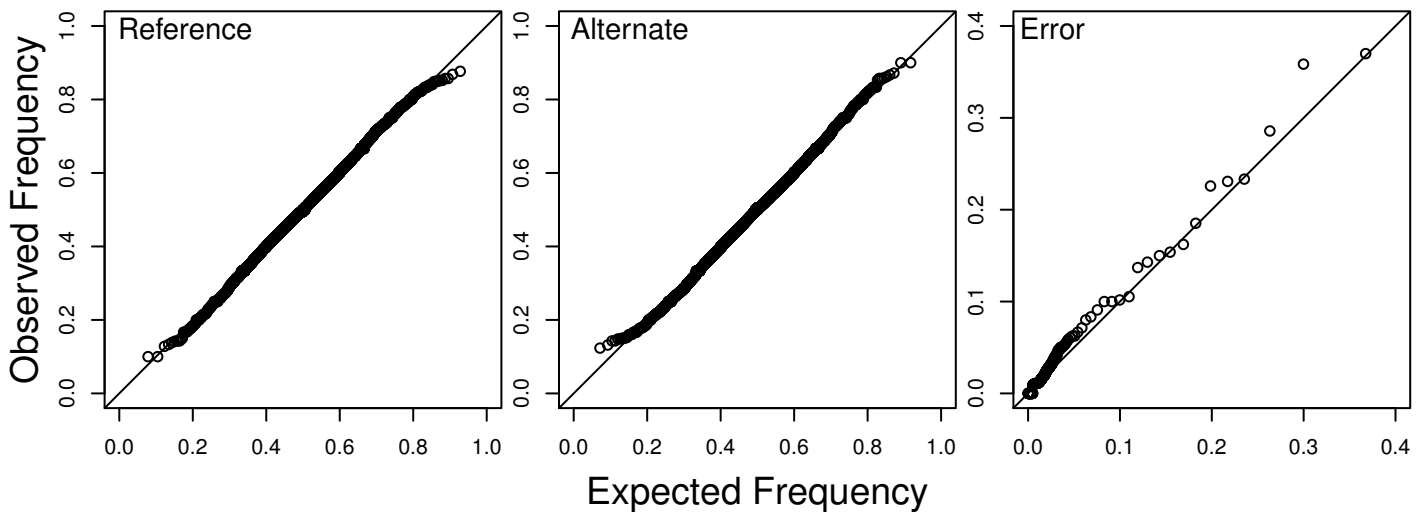

Figure S4 (Continued): **Mixtures of Dirichlet-multinomials provide the best fits to genomic data: CEU12 Chr21 TH.**

### Mixture of 5 Dirichlet–Multinomials

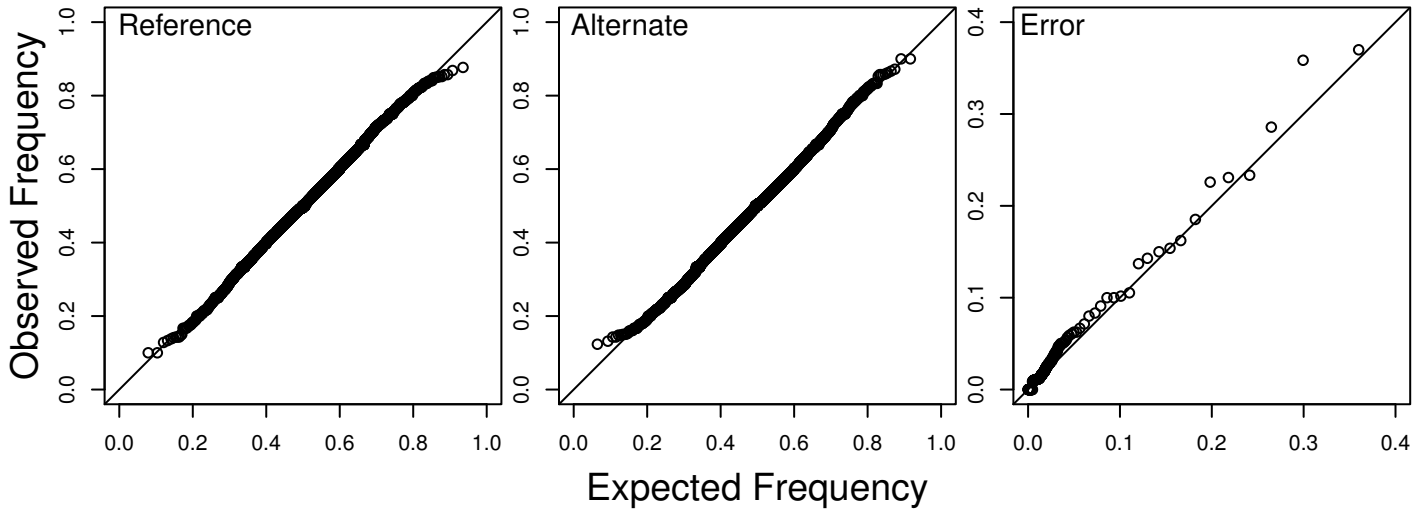

### Mixture of 6 Dirichlet–Multinomials

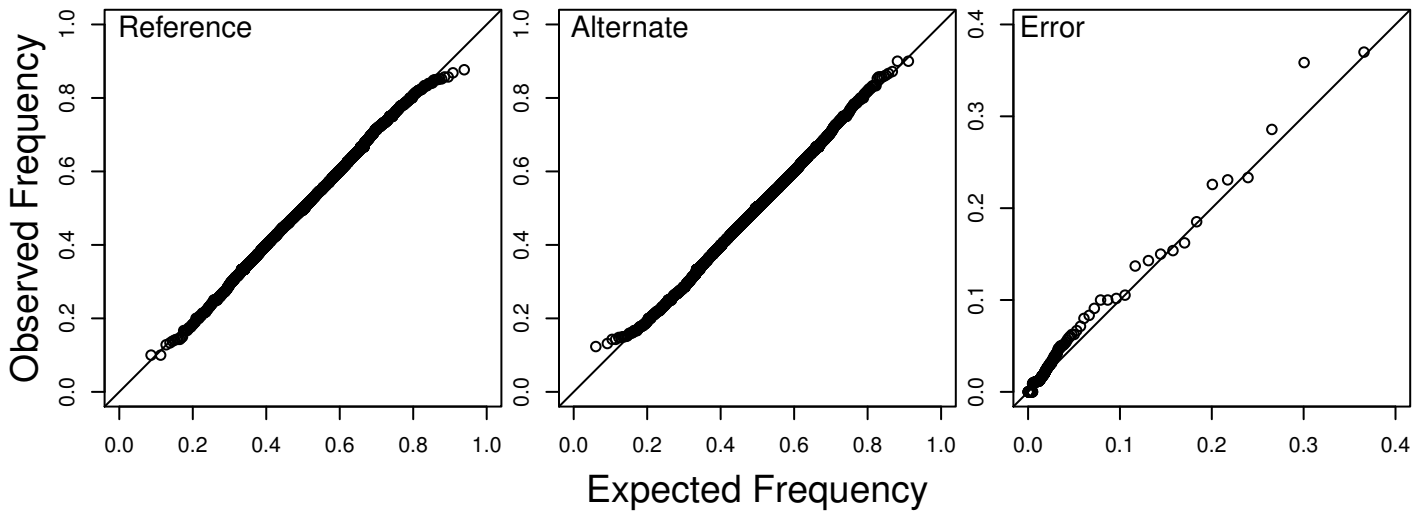

Figure S4 (Continued): **Mixtures of Dirichlet-multinomials provide the best fits to genomic data: CEU12 Chr21 TH.**

## Multinomial

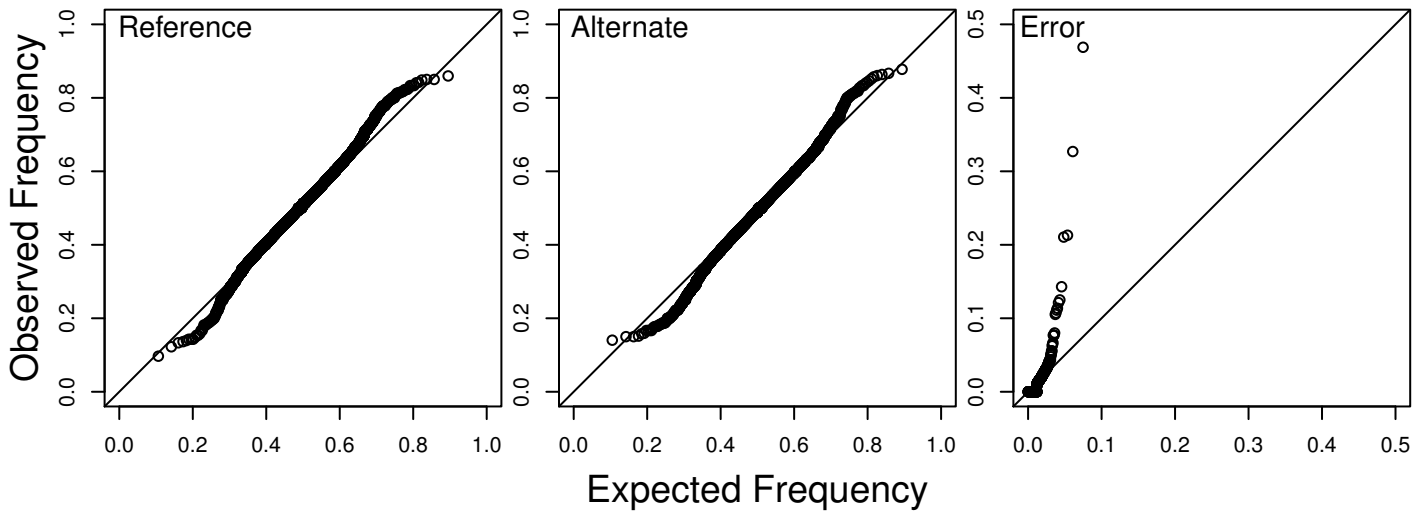

## Biased Multinomial

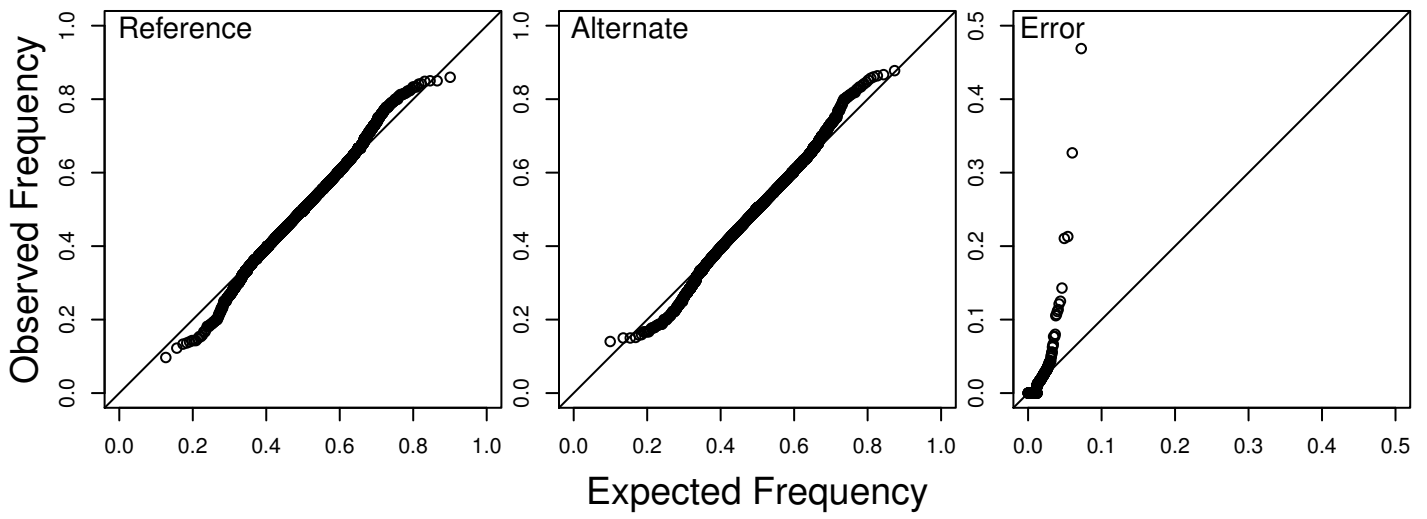

## Dirichlet-Multinomial

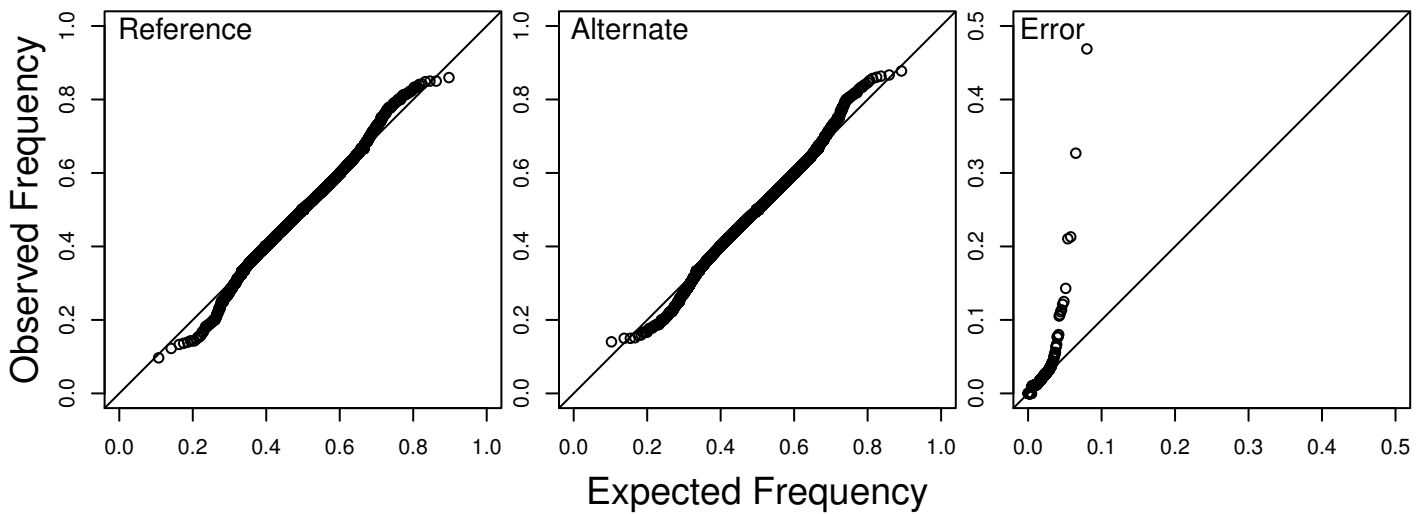

Figure S5: Mixtures of Dirichlet-multinomials provide the best fits to genomic data: CEU11 Chr10 TH.

### Mixture of 2 Dirichlet-Multinomials

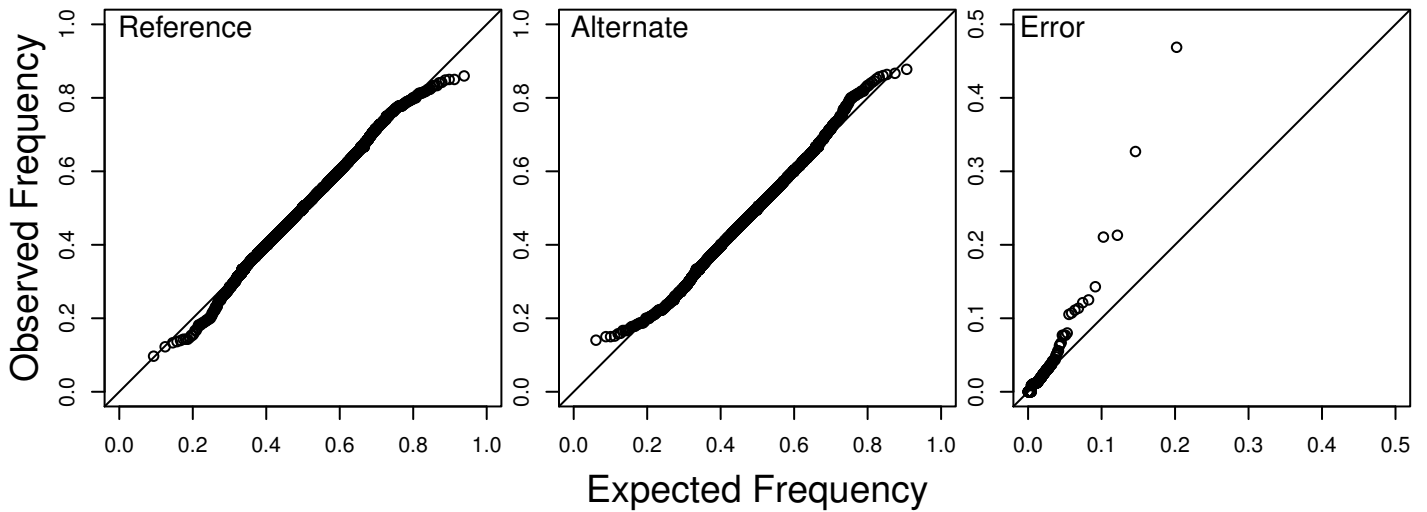

### Mixture of 3 Dirichlet-Multinomials

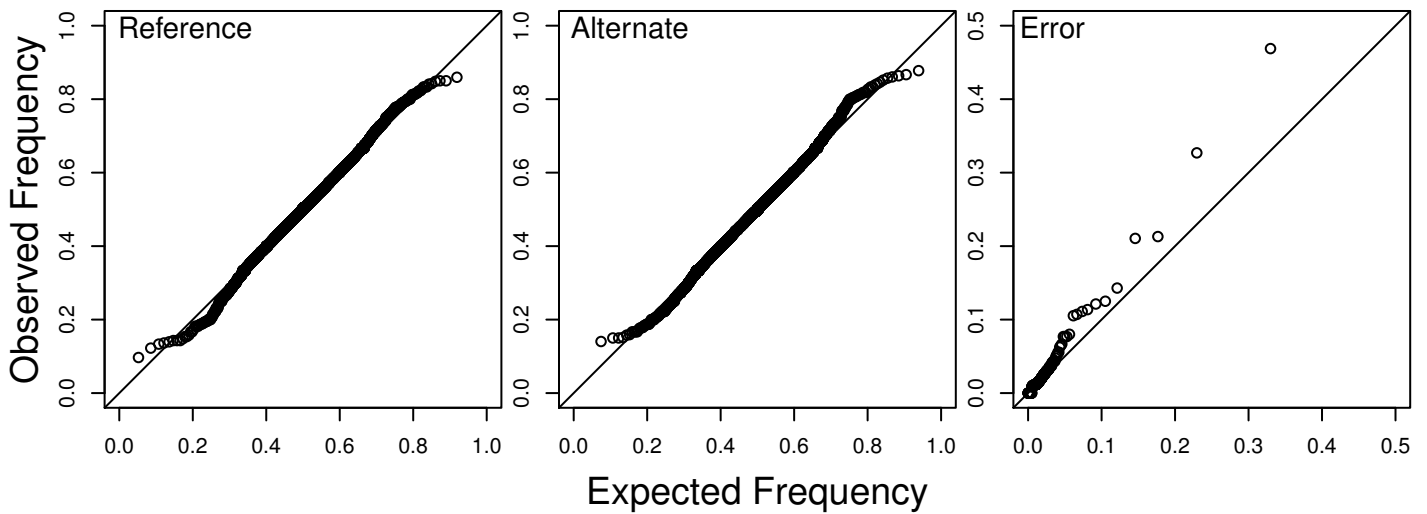

### Mixture of 4 Dirichlet-Multinomials

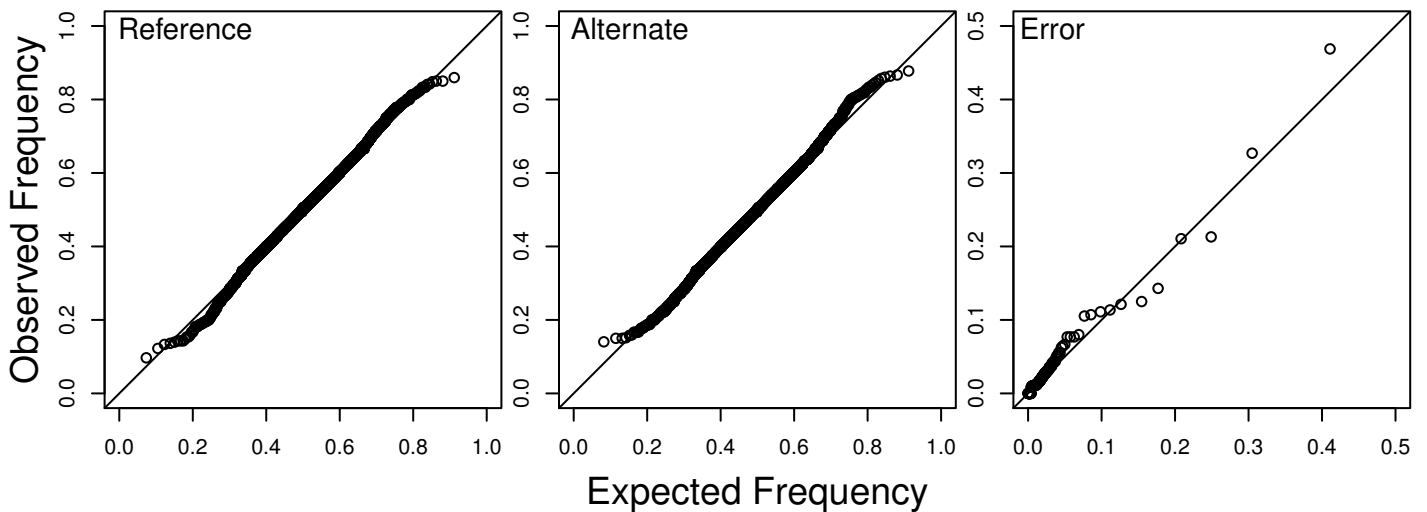

Figure S5 (Continued): **Mixtures of Dirichlet-multinomials provide the best fits to genomic data: CEU11 Chr10 TH.**

### Mixture of 5 Dirichlet–Multinomials

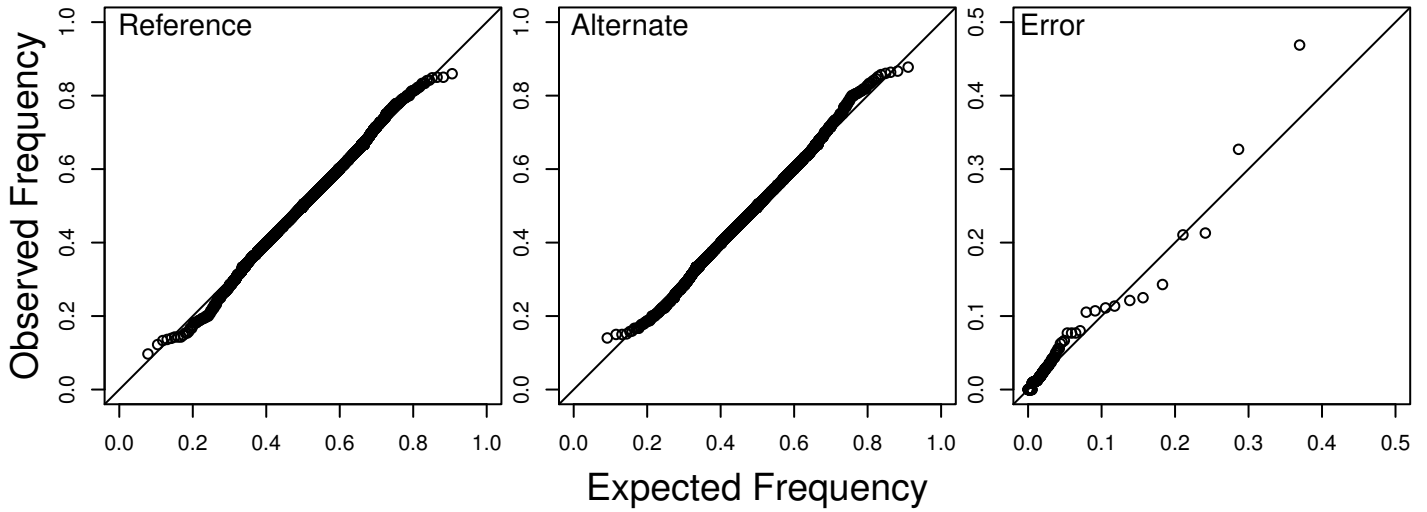

### Mixture of 6 Dirichlet–Multinomials

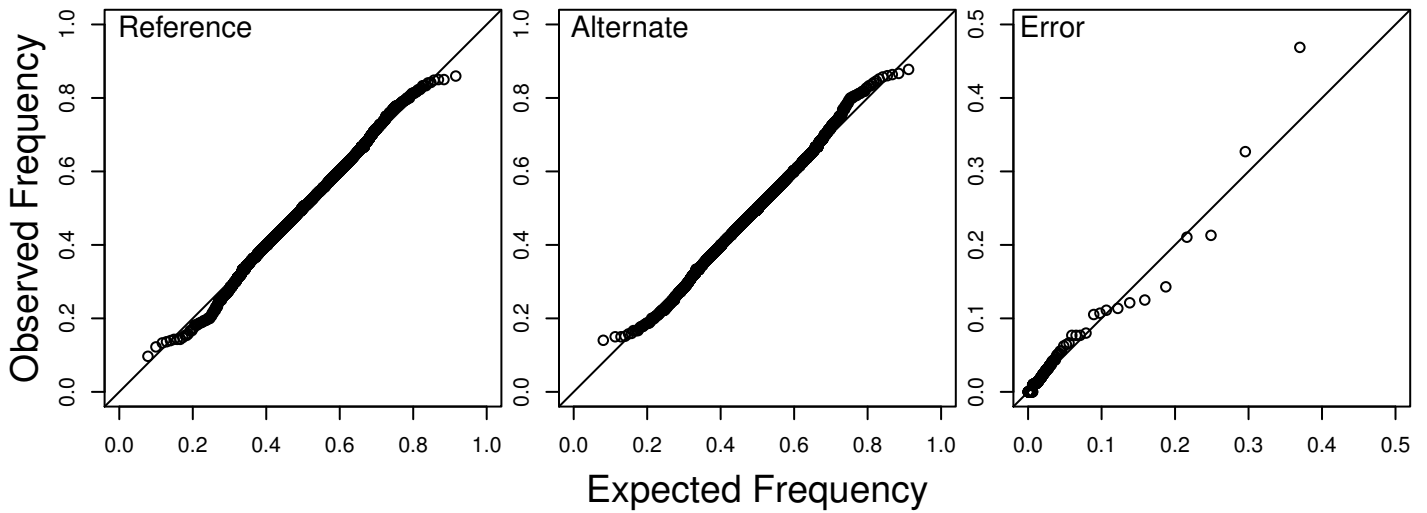

Figure S5 (Continued): **Mixtures of Dirichlet-multinomials provide the best fits to genomic data: CEU11 Chr10 TH.**

## Multinomial

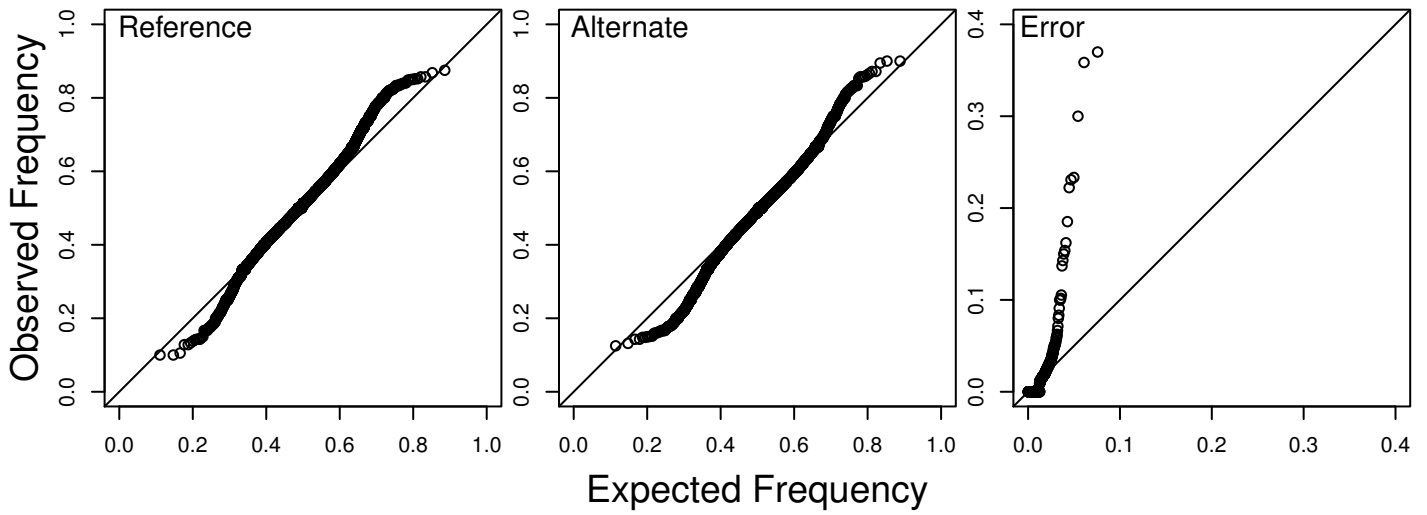

## Biased Multinomial

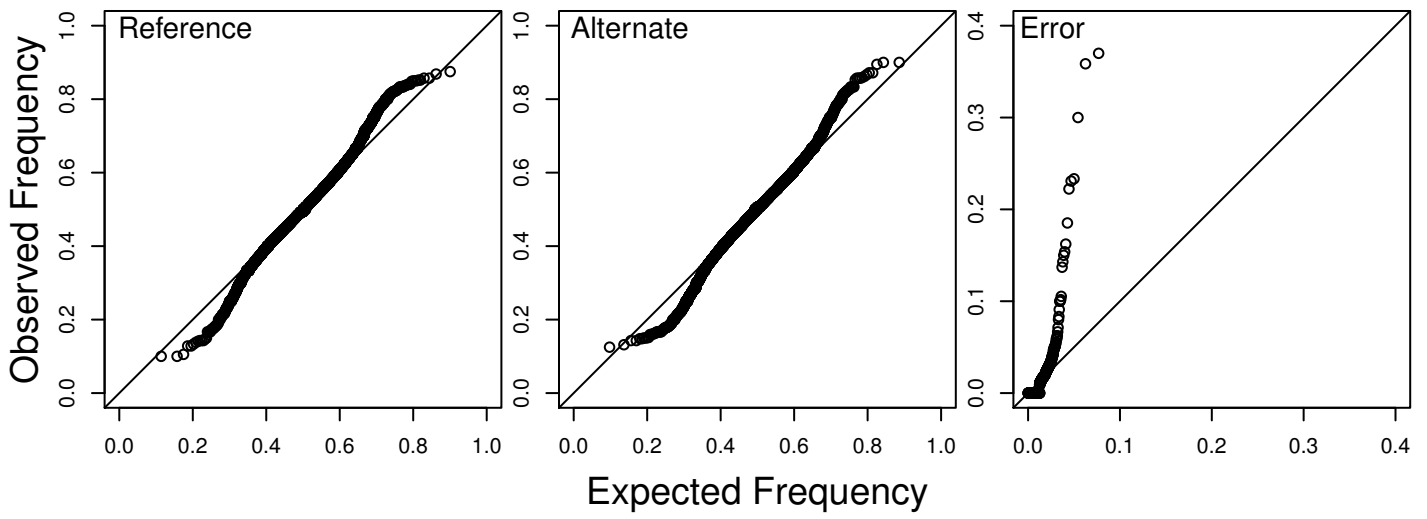

## Dirichlet-Multinomial

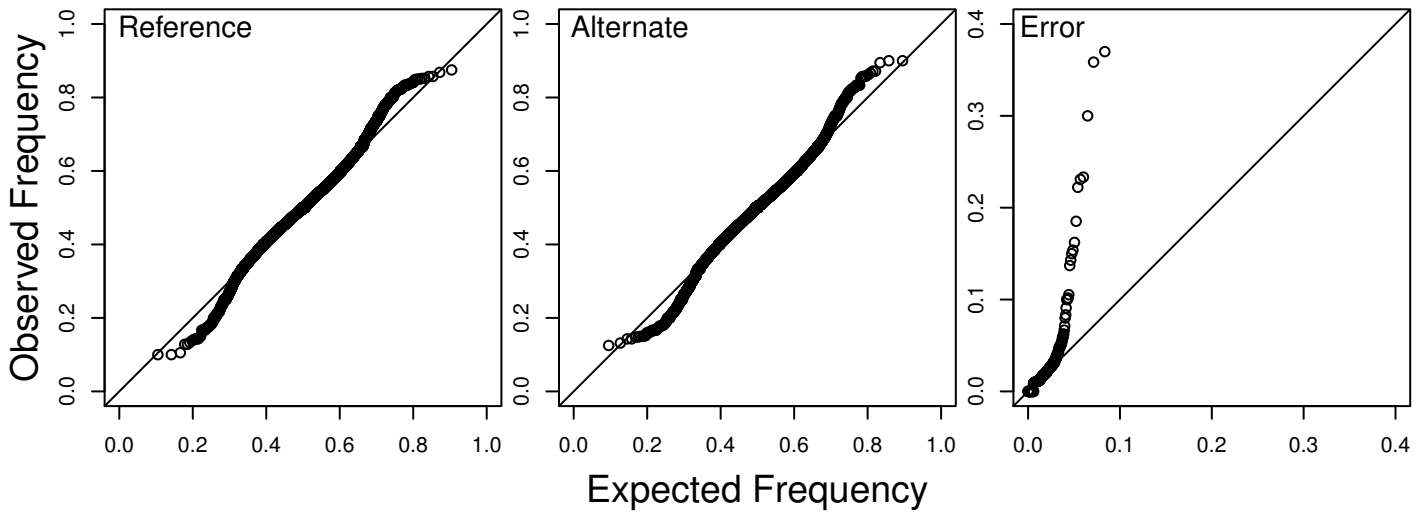

Figure S6: Mixtures of Dirichlet-multinomials provide the best fits to genomic data: CEU11 Chr21 TH.



### Mixture of 2 Dirichlet-Multinomials

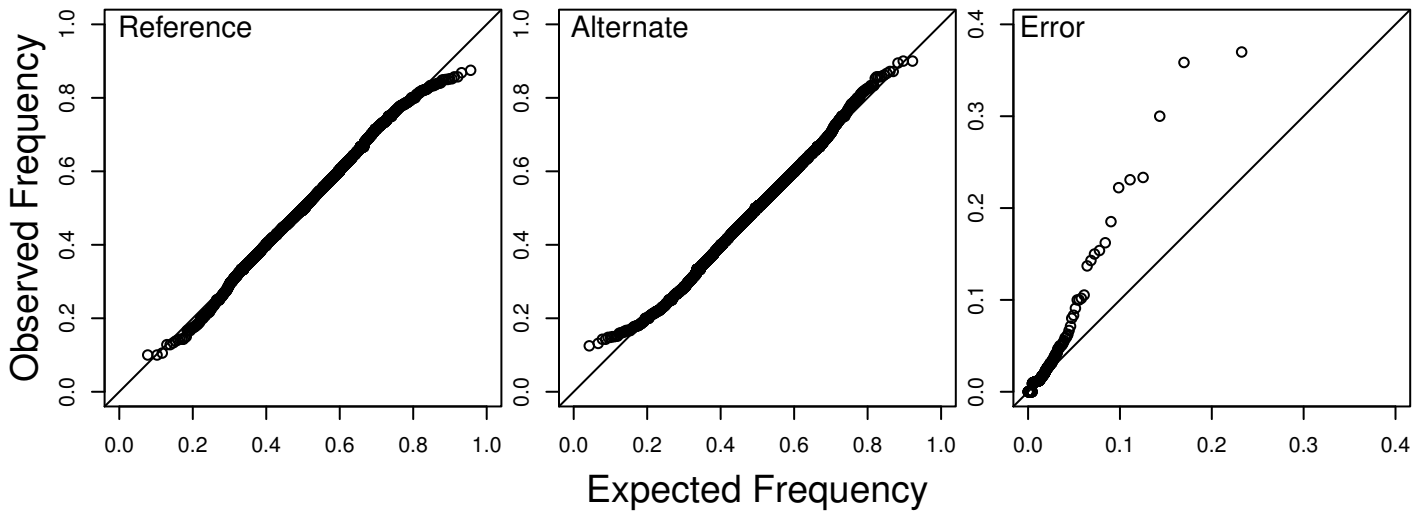

### Mixture of 3 Dirichlet-Multinomials

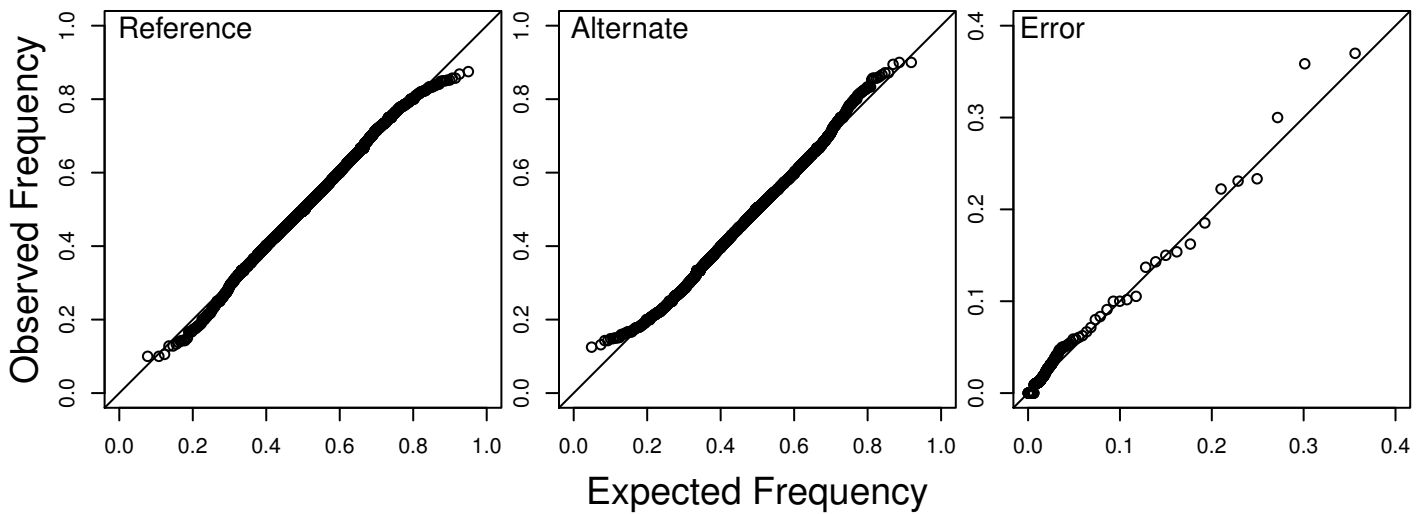

### Mixture of 4 Dirichlet-Multinomials

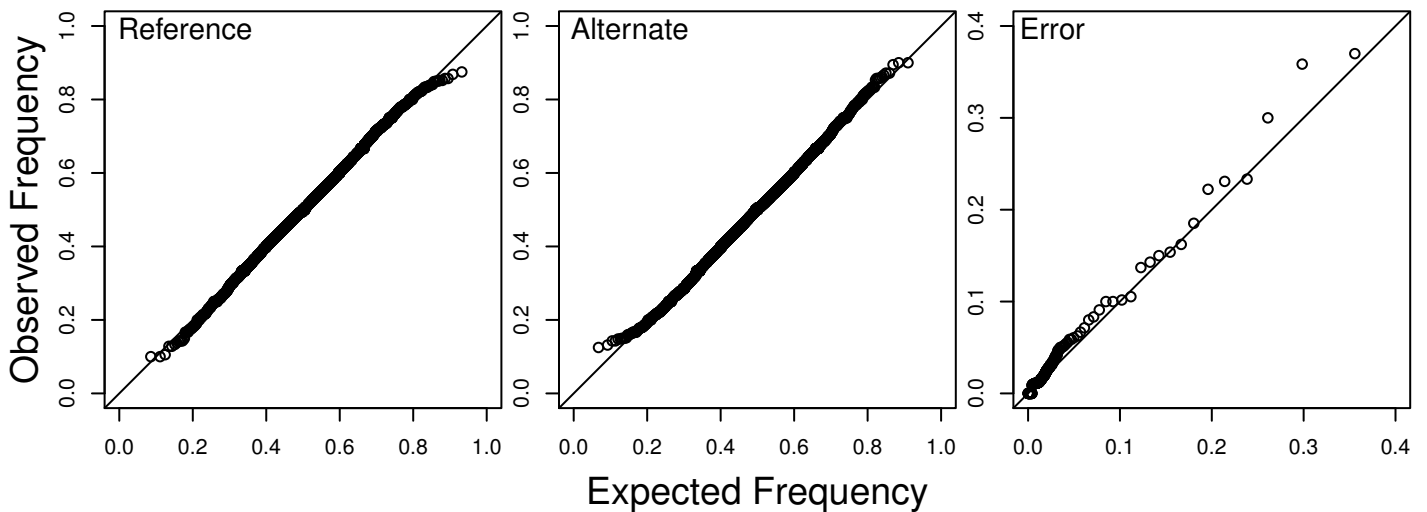

Figure S6 (Continued): **Mixtures of Dirichlet-multinomials provide the best fits to genomic data: CEU11 Chr21 TH.**

### Mixture of 5 Dirichlet–Multinomials

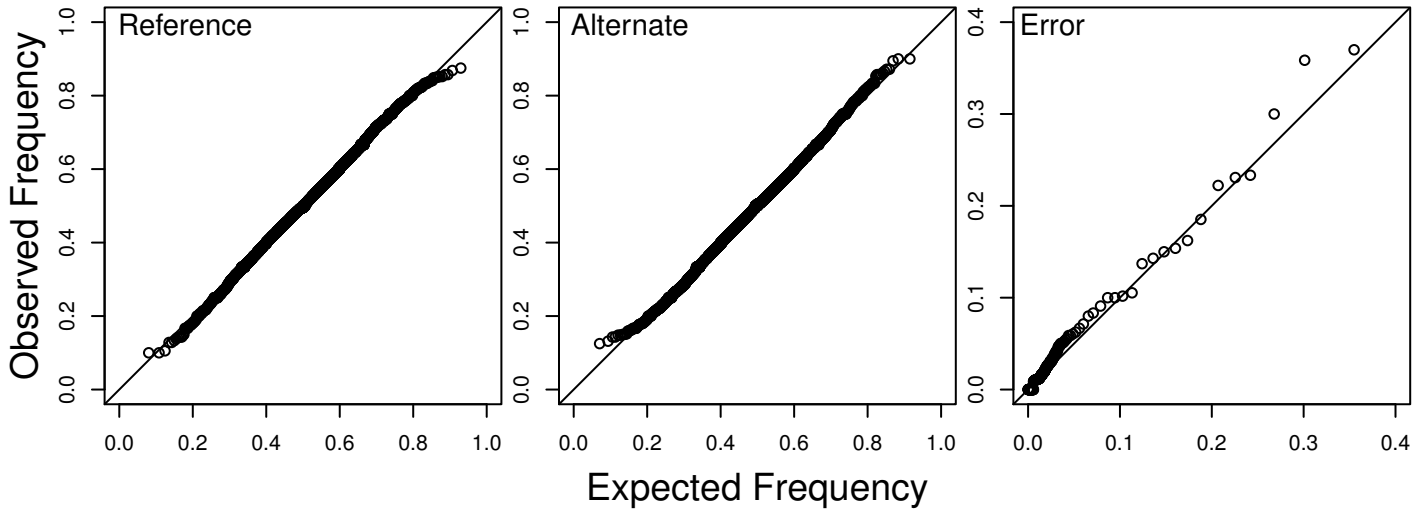

### Mixture of 6 Dirichlet–Multinomials

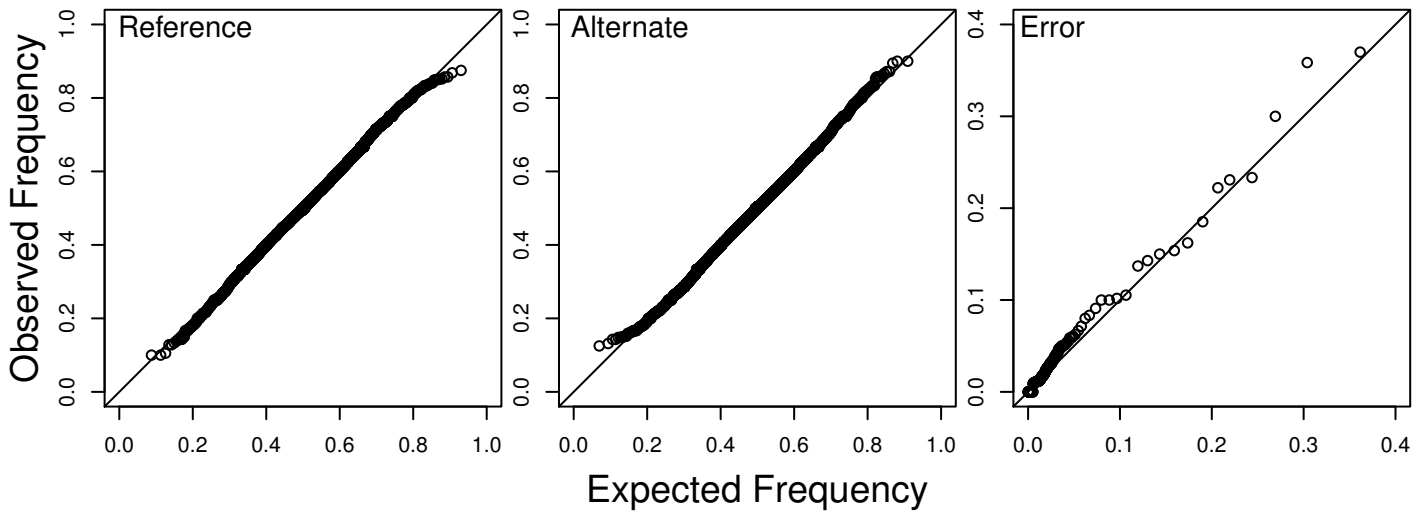

Figure S6 (Continued): **Mixtures of Dirichlet-multinomials provide the best fits to genomic data: CEU11 Chr21 TH.**

## Multinomial

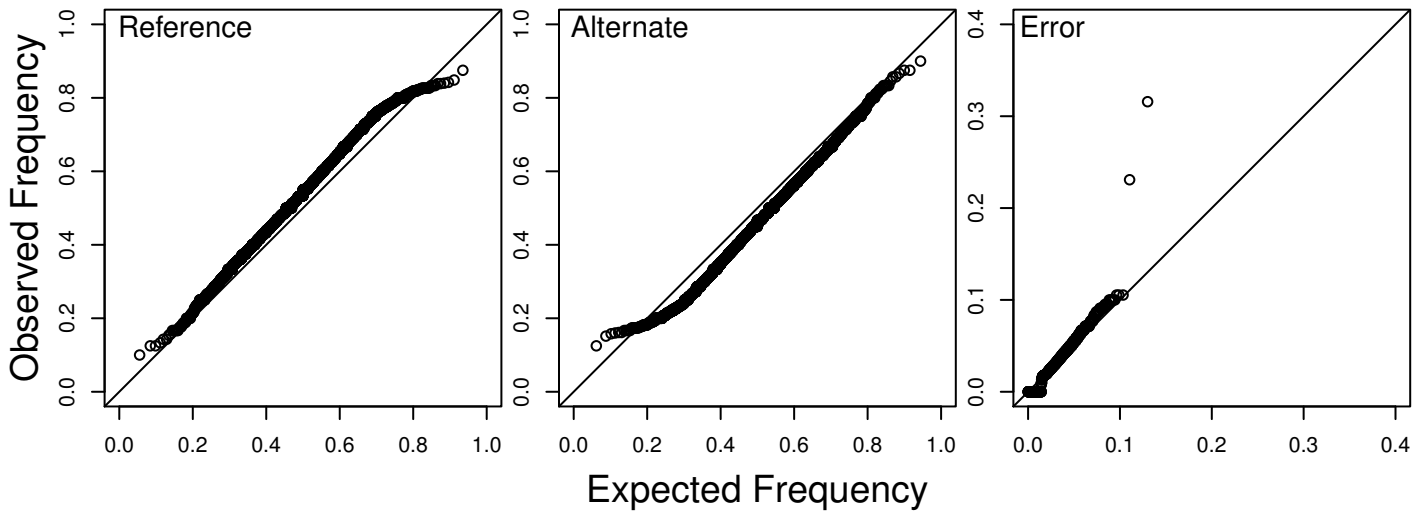

## Biased Multinomial

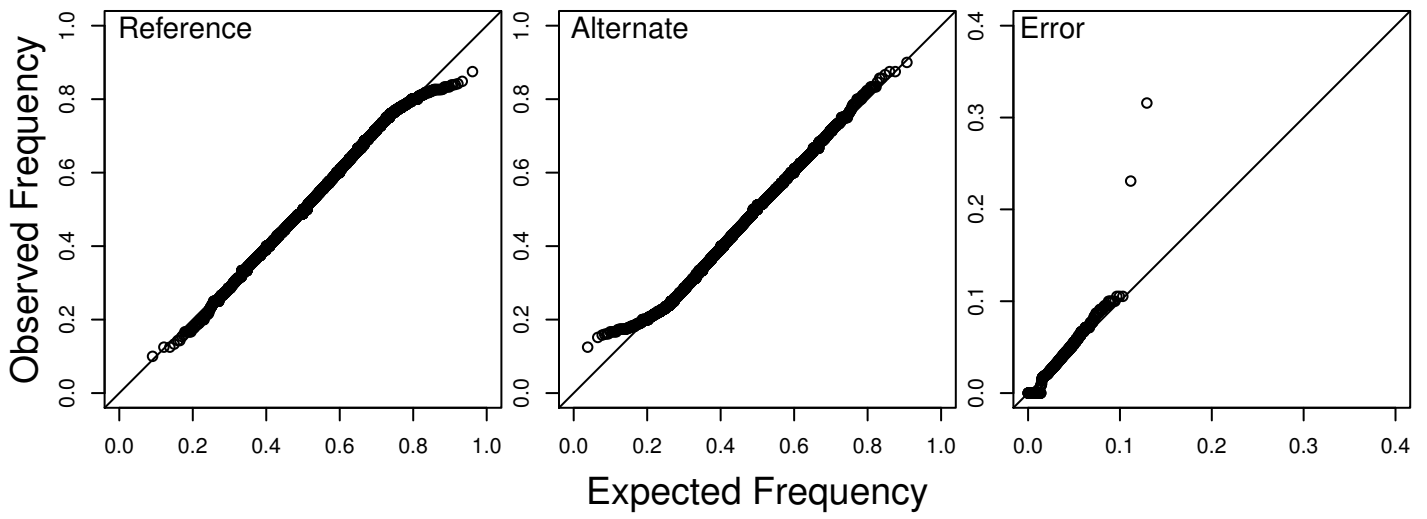

## Dirichlet-Multinomial

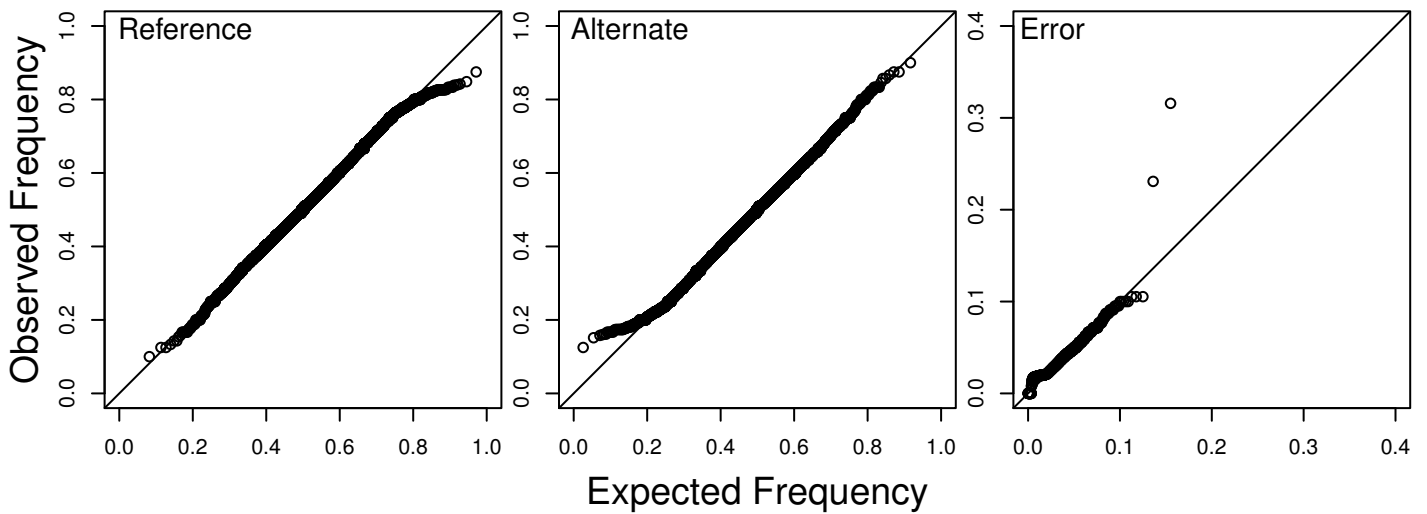

Figure S7: Mixtures of Dirichlet-multinomials provide the best fits to genomic data: CEU10 Chr10 TH.

### Mixture of 2 Dirichlet-Multinomials

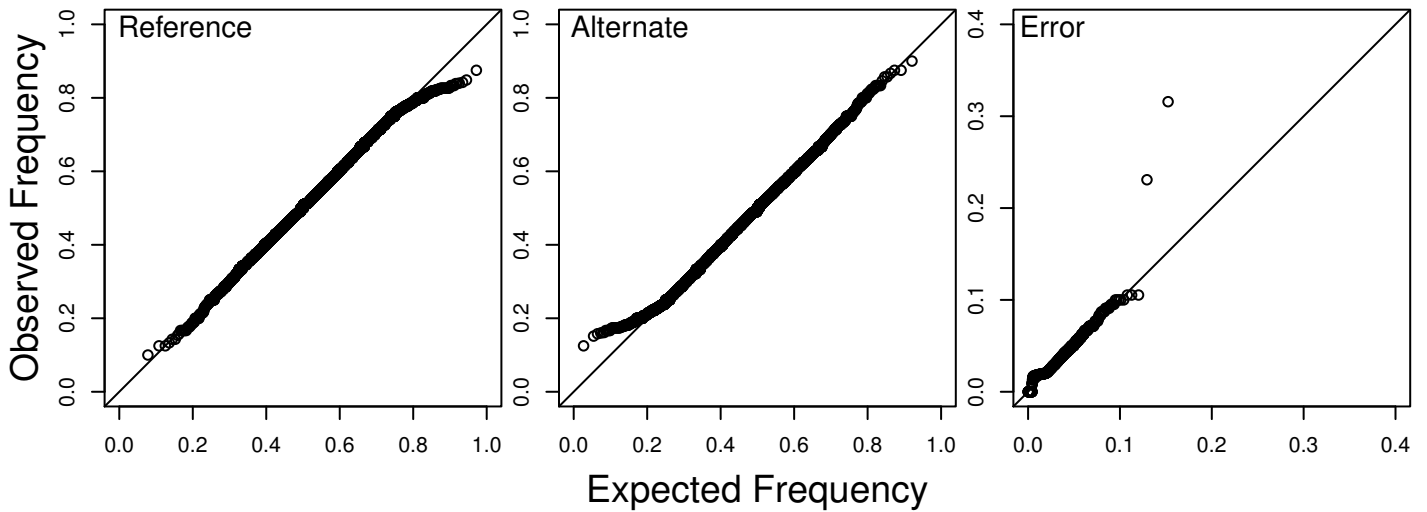

### Mixture of 3 Dirichlet-Multinomials

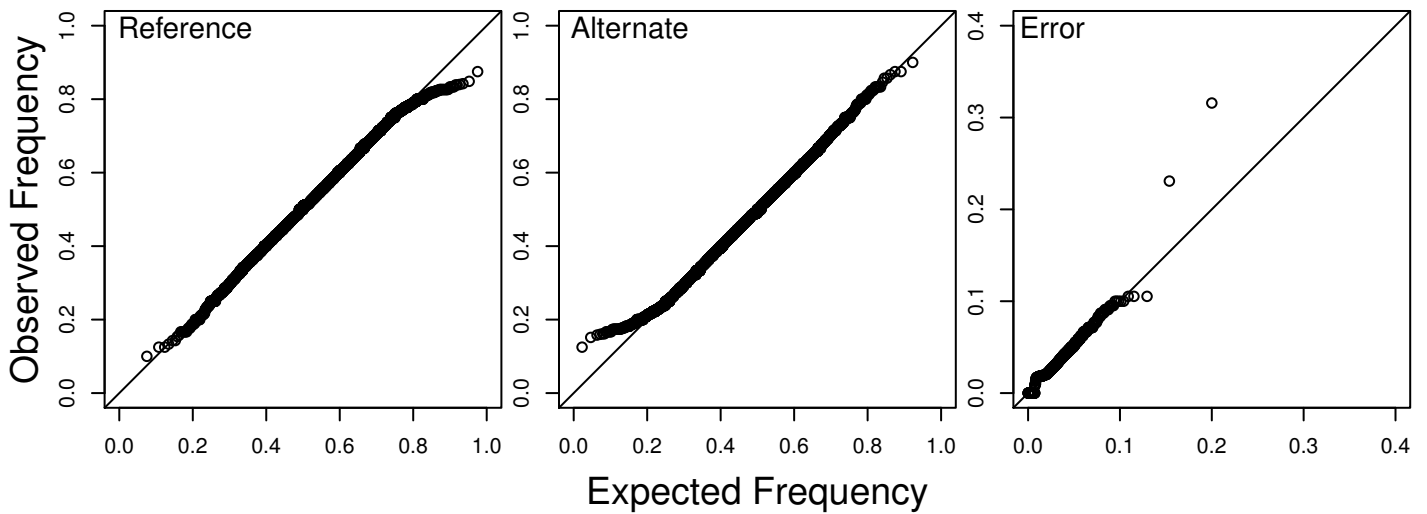

### Mixture of 4 Dirichlet-Multinomials

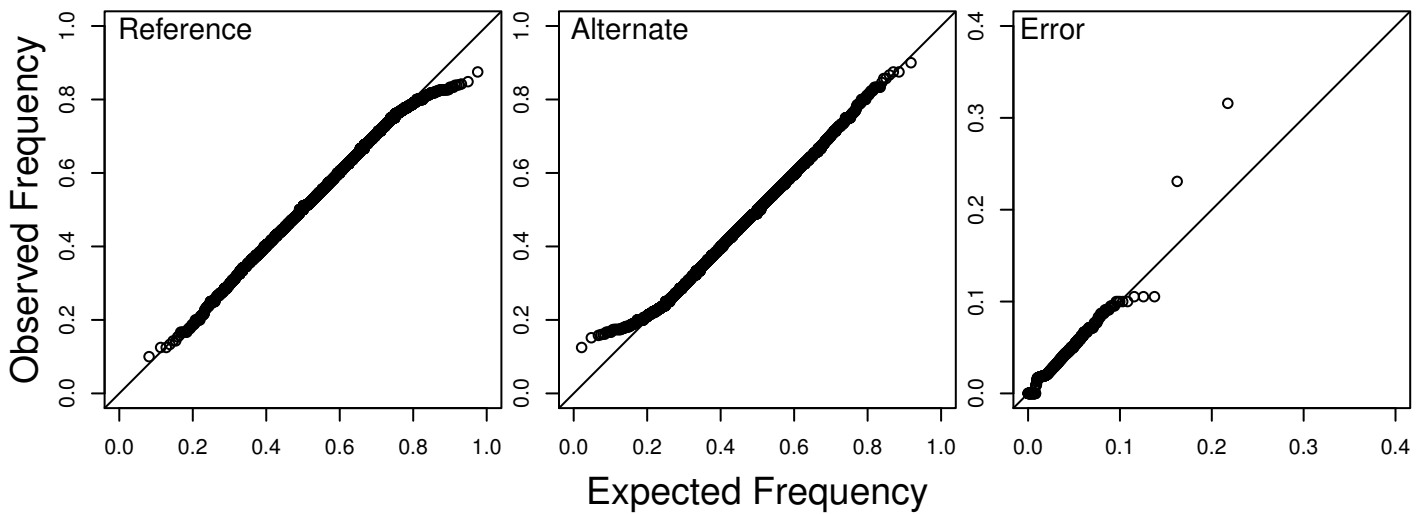

Figure S7 (Continued): **Mixtures of Dirichlet-multinomials provide the best fits to genomic data: CEU10 Chr10 TH.**

### Mixture of 5 Dirichlet–Multinomials

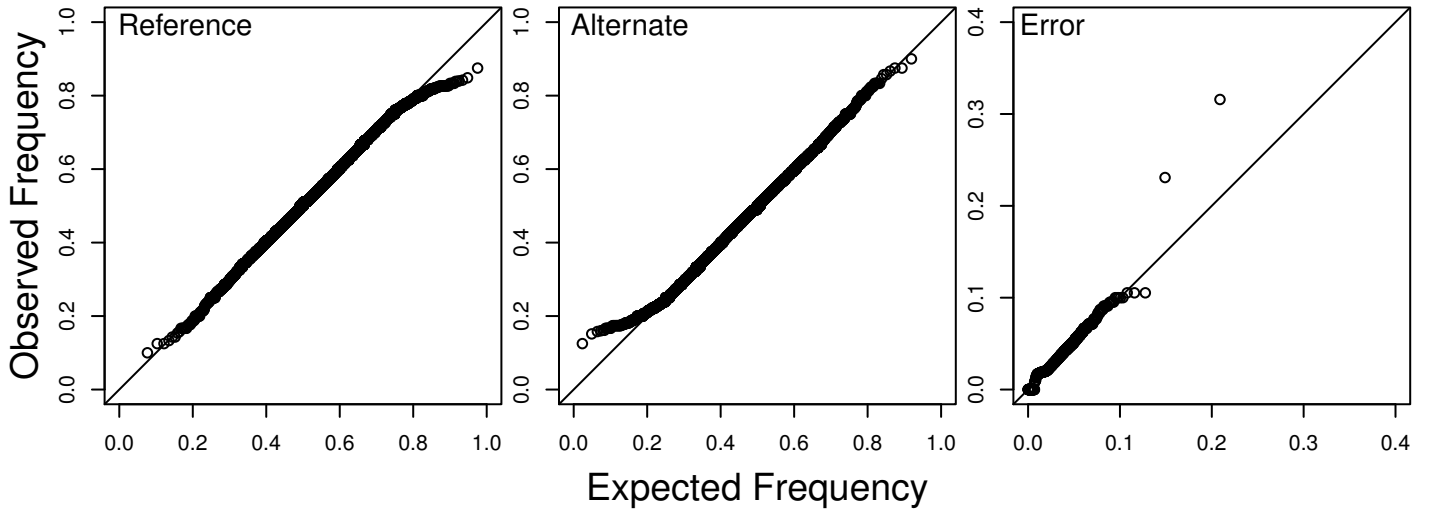

### Mixture of 6 Dirichlet–Multinomials

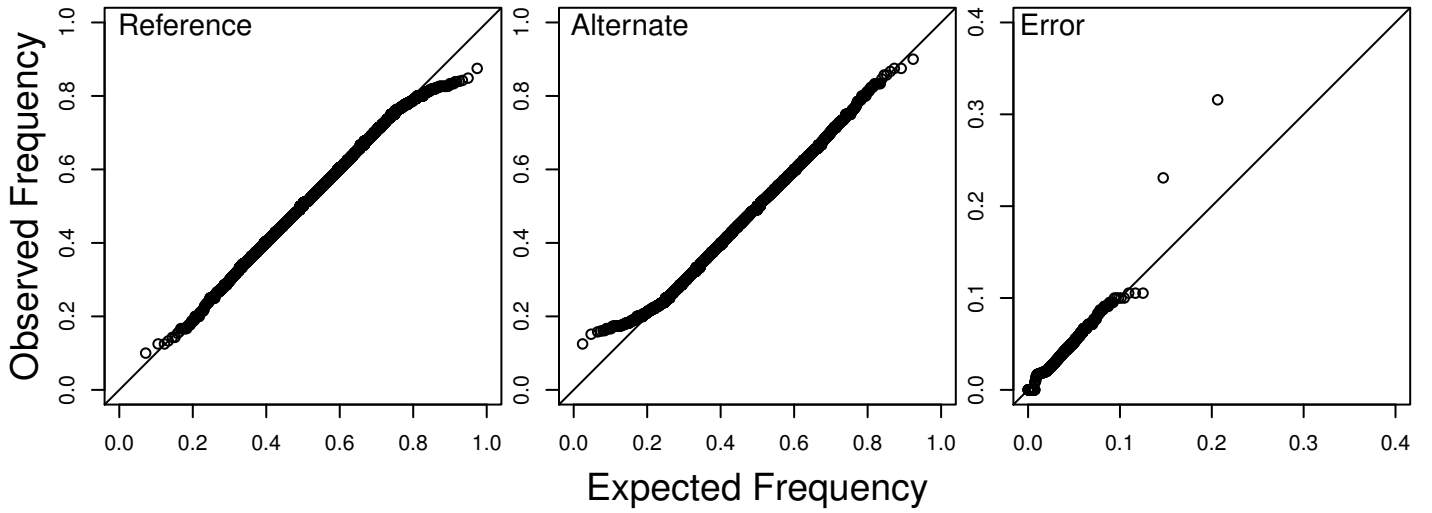

Figure S7 (Continued): **Mixtures of Dirichlet-multinomials provide the best fits to genomic data: CEU10 Chr10 TH.**

## Multinomial

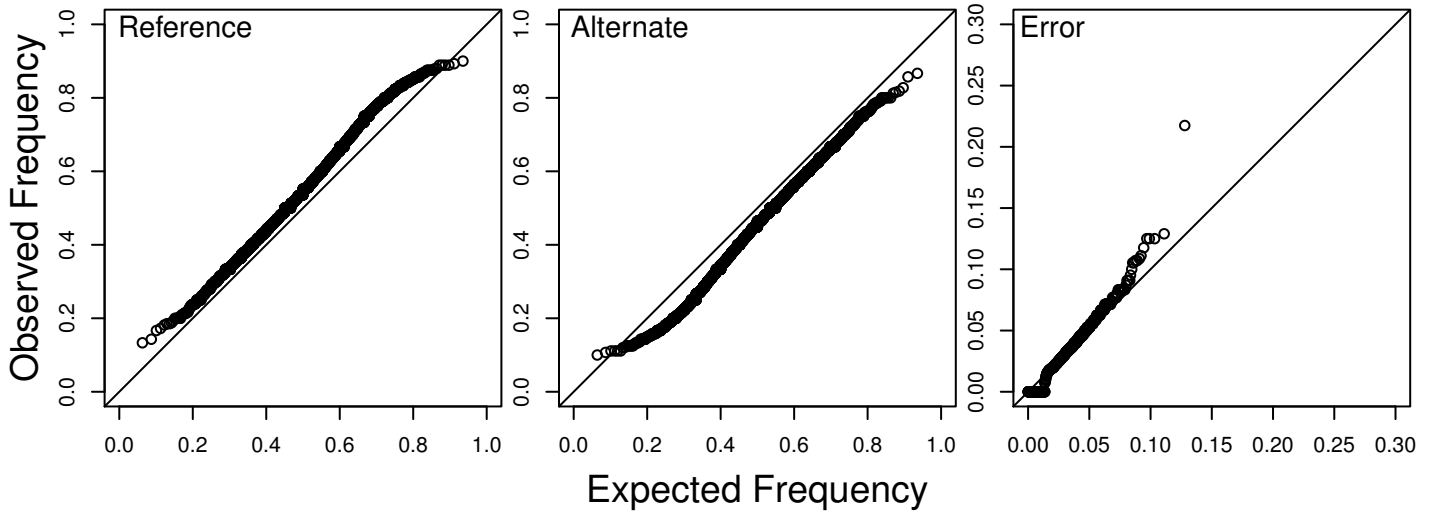

## Biased Multinomial

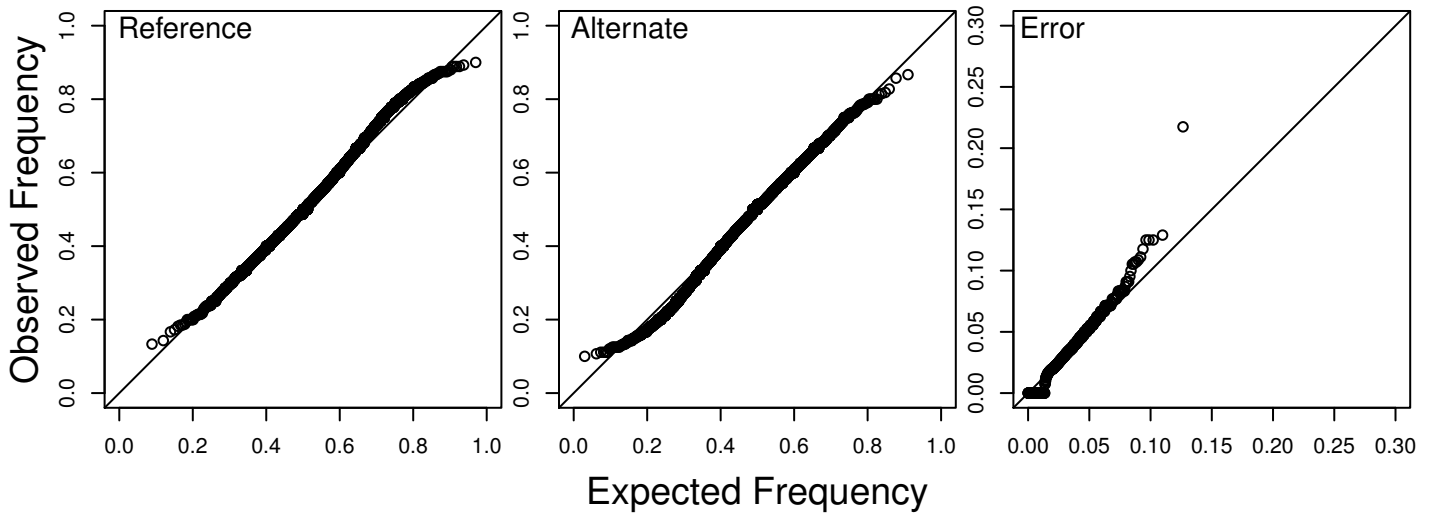

## Dirichlet-Multinomial

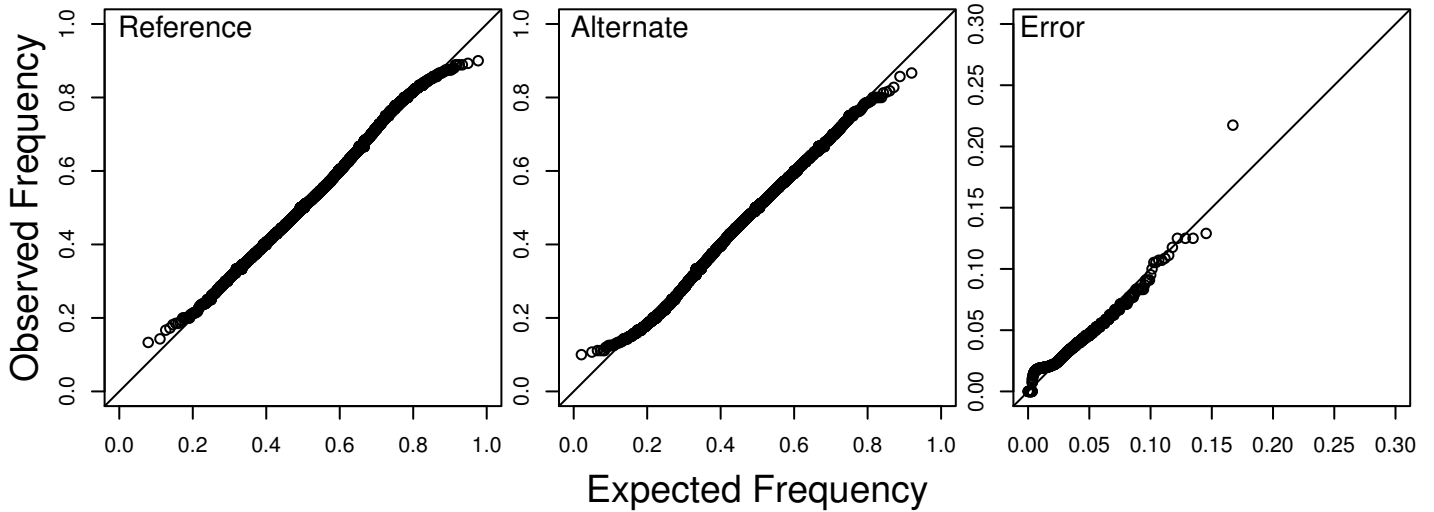

Figure S8: Mixtures of Dirichlet-multinomials provide the best fits to genomic data: CEU10 Chr21 TH.

### Mixture of 2 Dirichlet-Multinomials

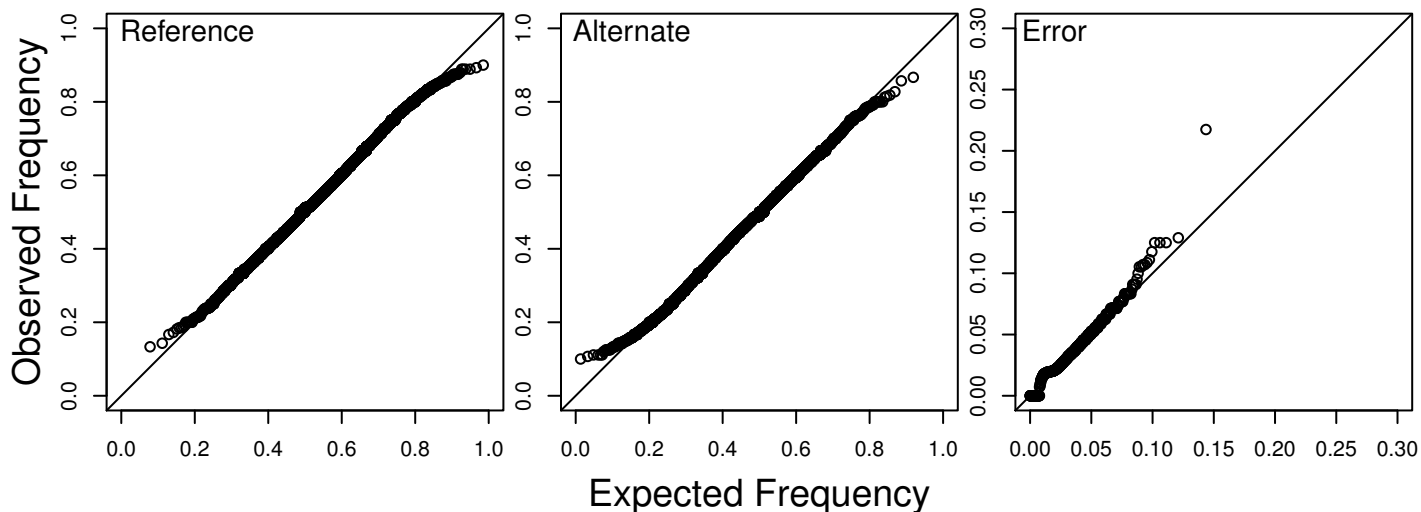

### Mixture of 3 Dirichlet-Multinomials

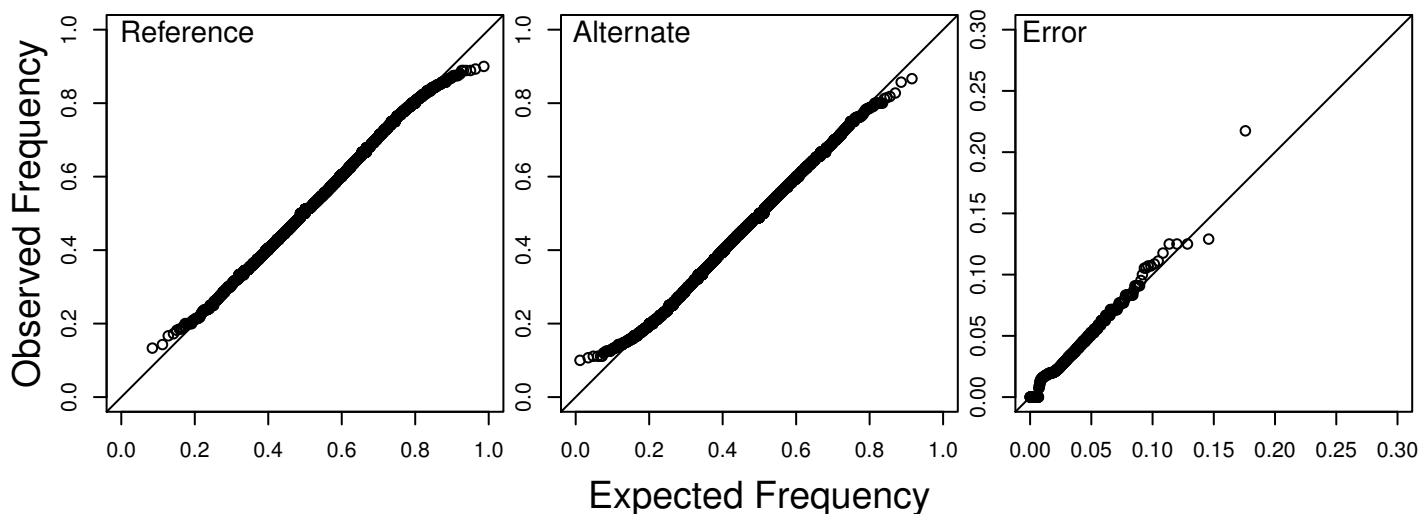

### Mixture of 4 Dirichlet-Multinomials

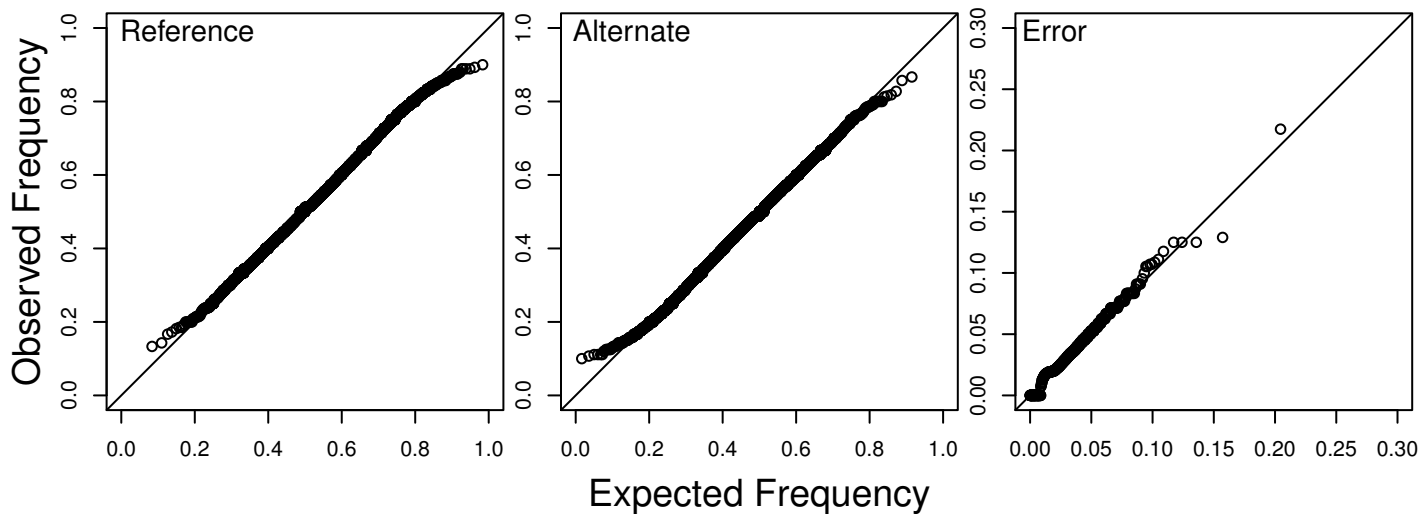

Figure S8 (Continued): **Mixtures of Dirichlet-multinomials provide the best fits to genomic data: CEU10 Chr21 TH.**

### Mixture of 5 Dirichlet–Multinomials

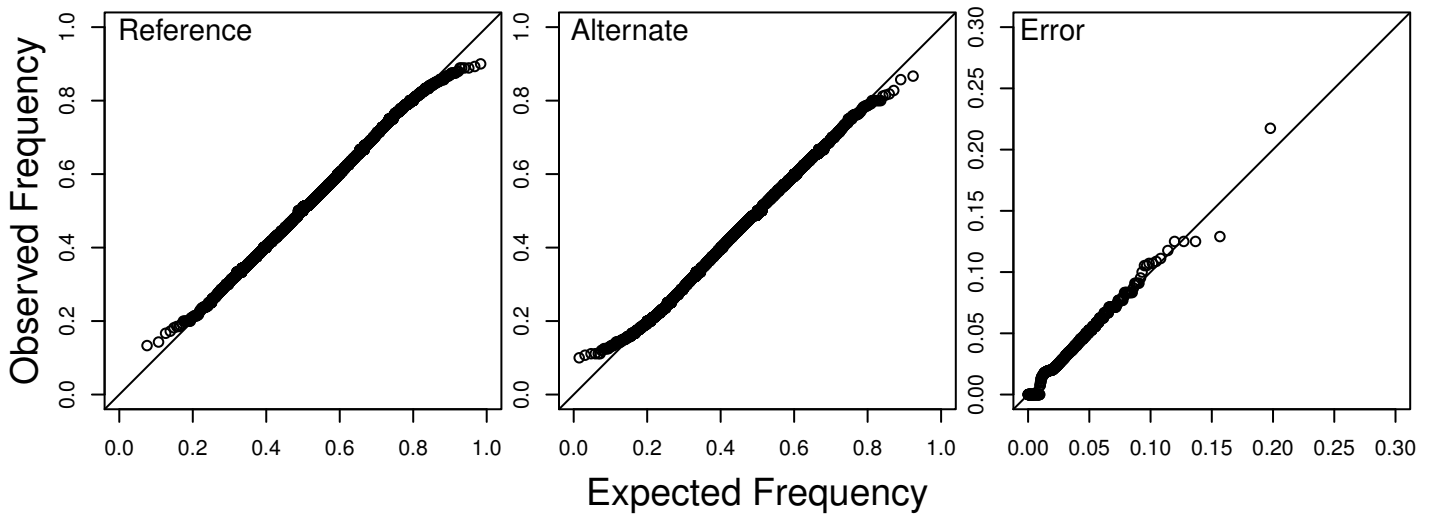

### Mixture of 6 Dirichlet–Multinomials

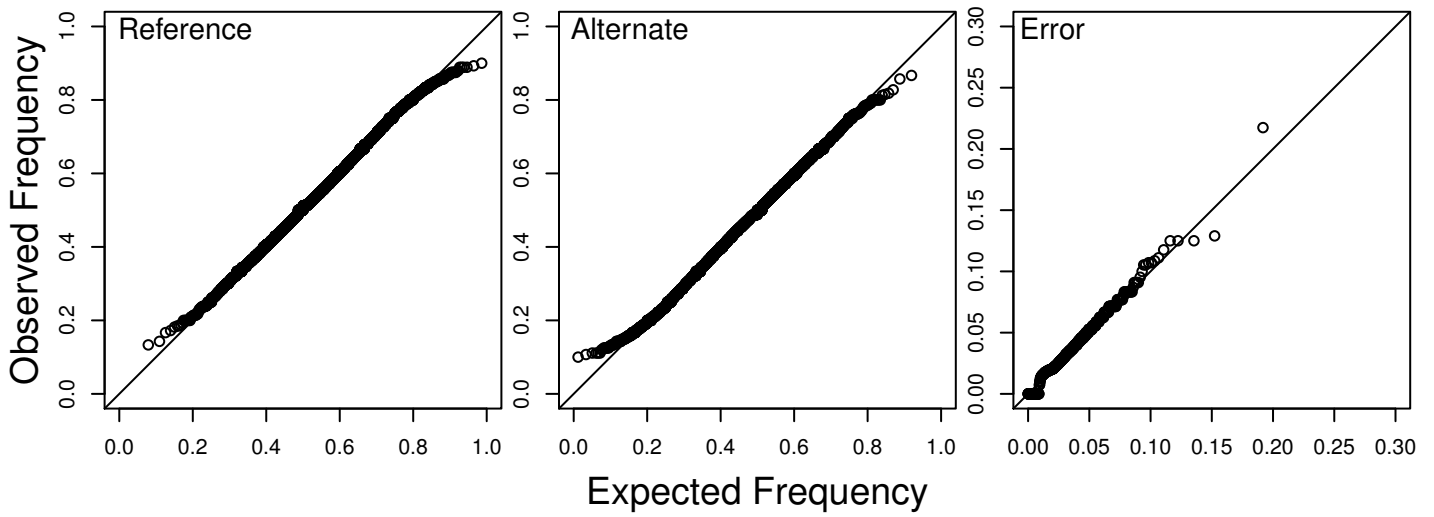

Figure S8 (Continued): **Mixtures of Dirichlet-multinomials provide the best fits to genomic data: CEU10 Chr21 TH.**



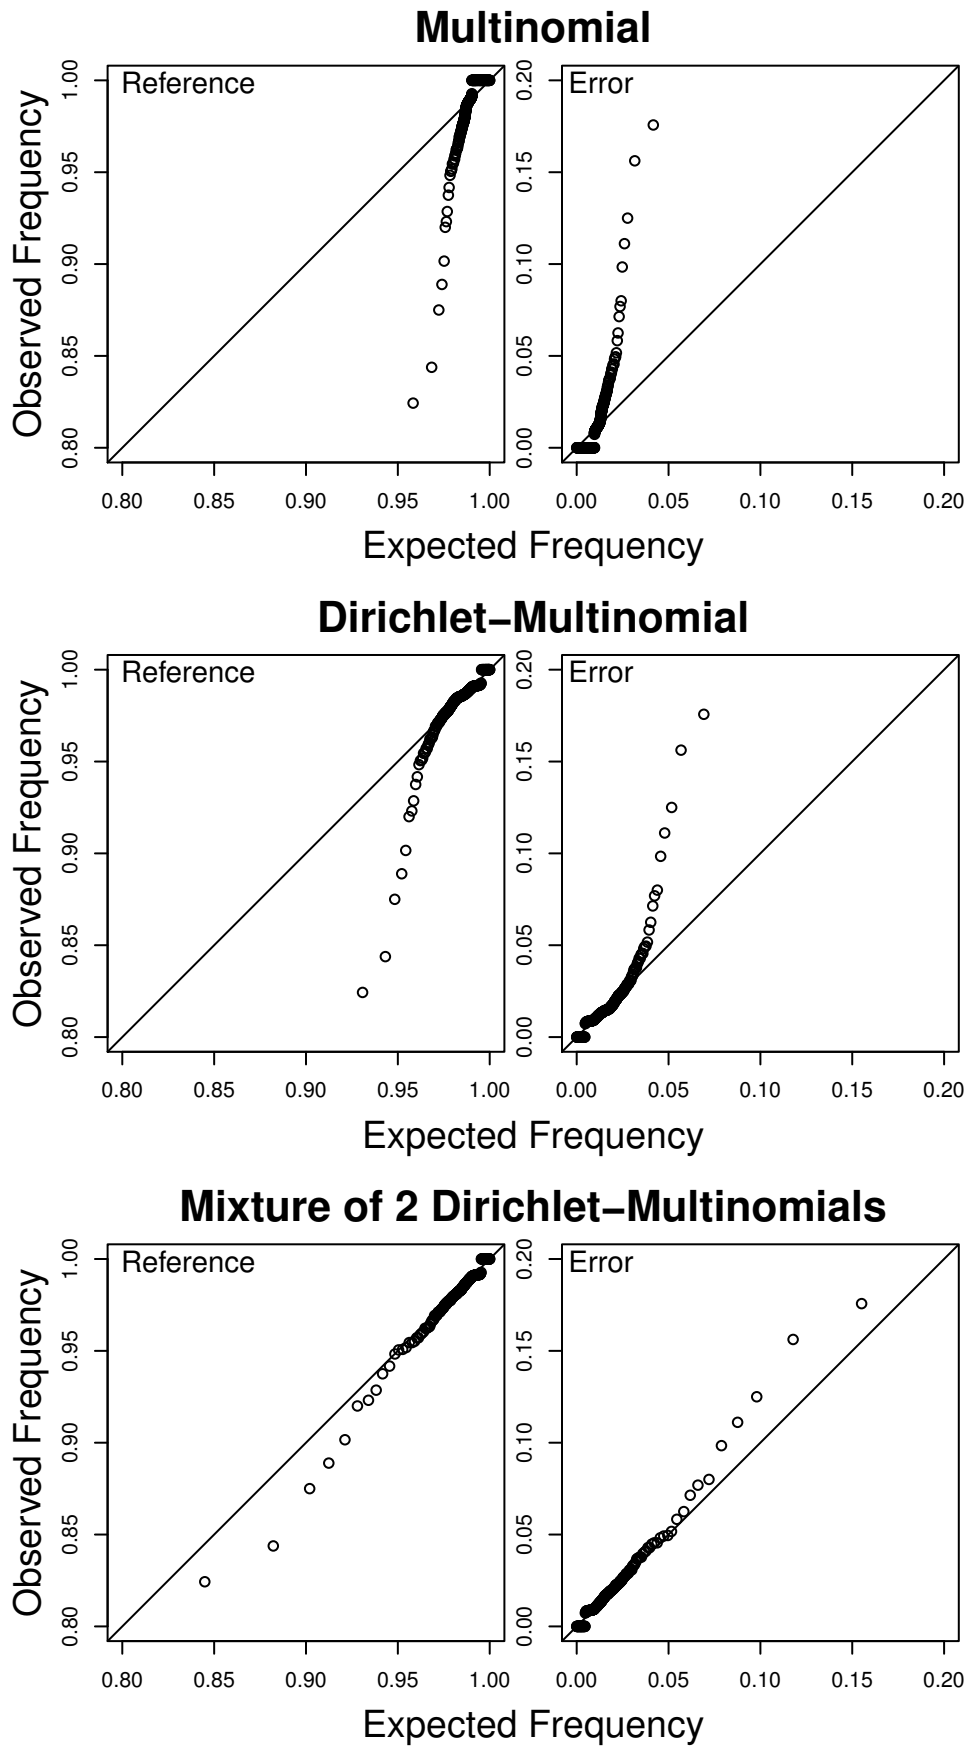

Figure S9: **Mixtures of Dirichlet-multinomials provide the best fits to genomic data: CHM1 Chr10 RD.**

### Mixture of 3 Dirichlet-Multinomials

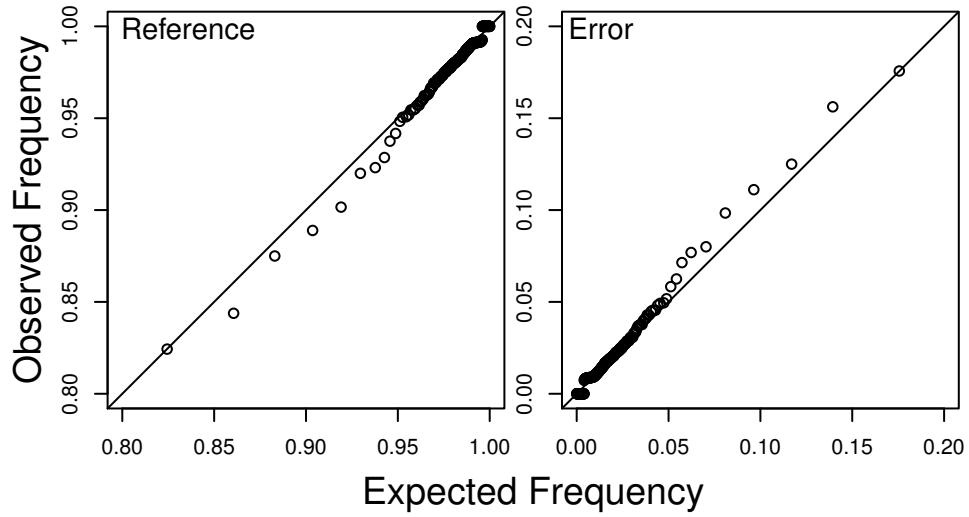

### Mixture of 4 Dirichlet-Multinomials

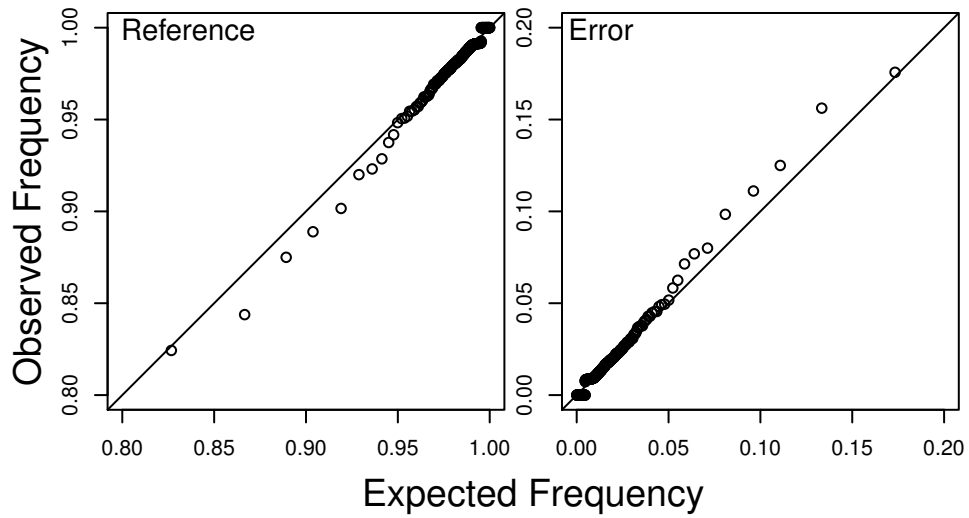

### Mixture of 5 Dirichlet-Multinomials

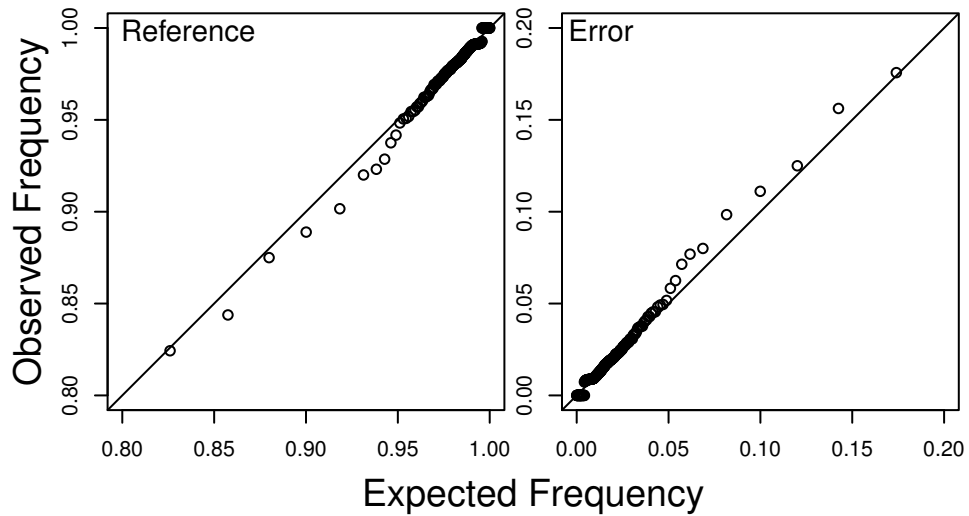

Figure S9 (Continued): **Mixtures of Dirichlet-multinomials provide the best fits to genomic data: CHM1 Chr10 RD.**

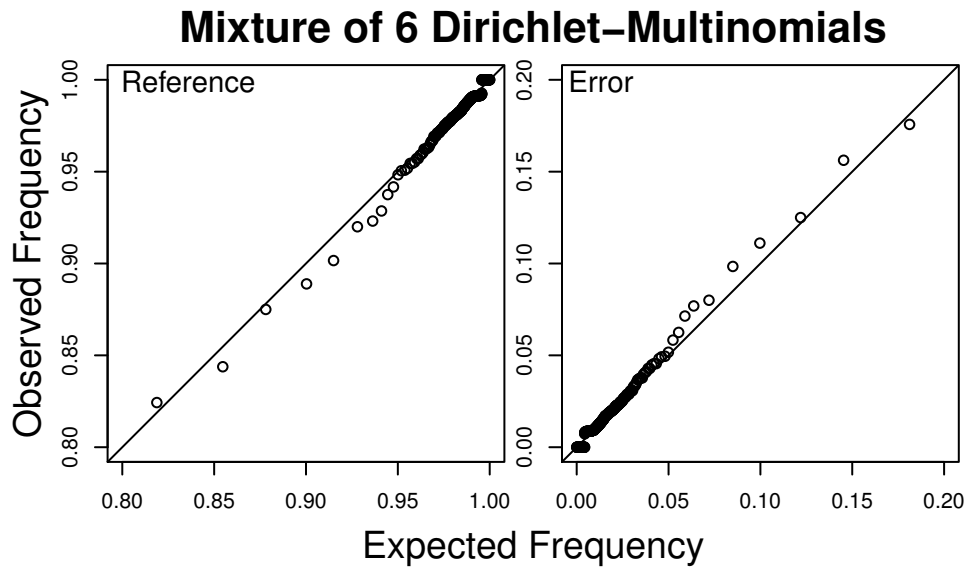

Figure S9 (Continued): **Mixtures of Dirichlet-multinomials provide the best fits to genomic data: CHM1 Chr10 RD.**

## Multinomial

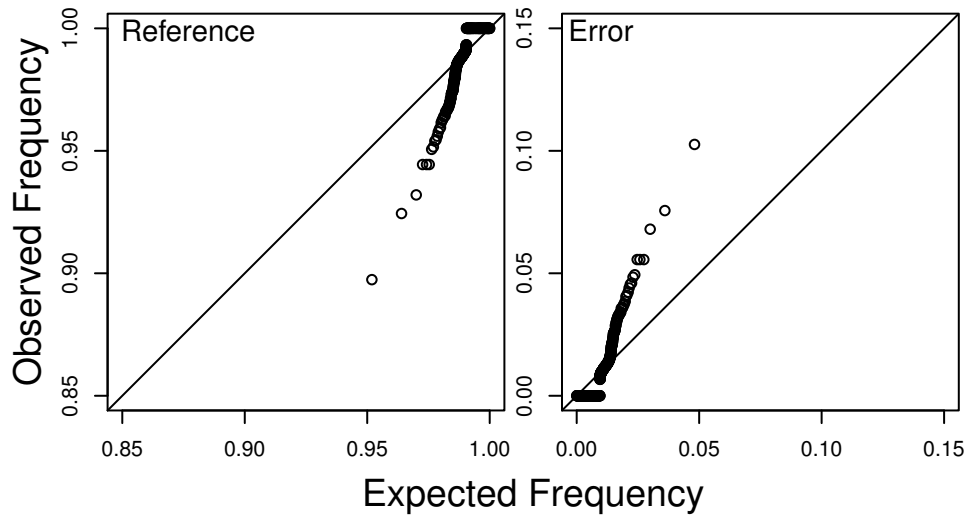

## Dirichlet-Multinomial

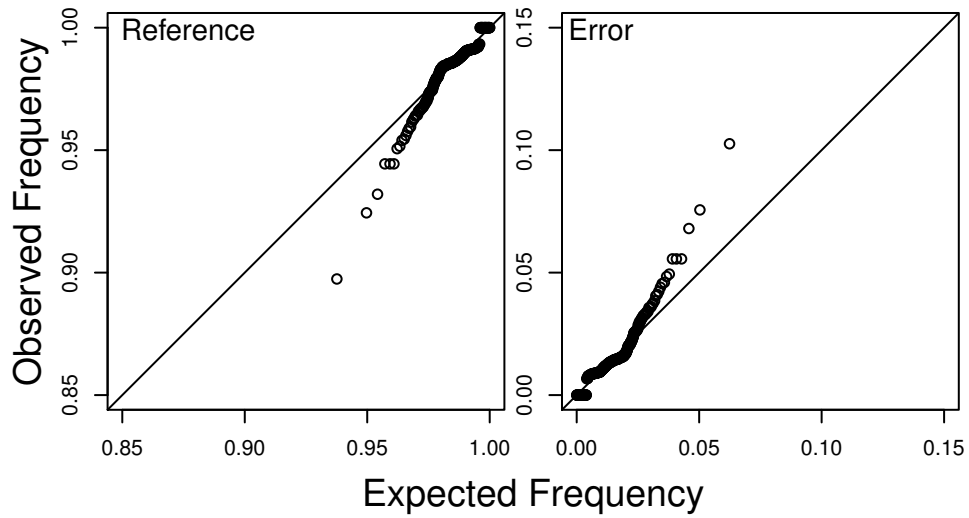

## Mixture of 2 Dirichlet-Multinomials

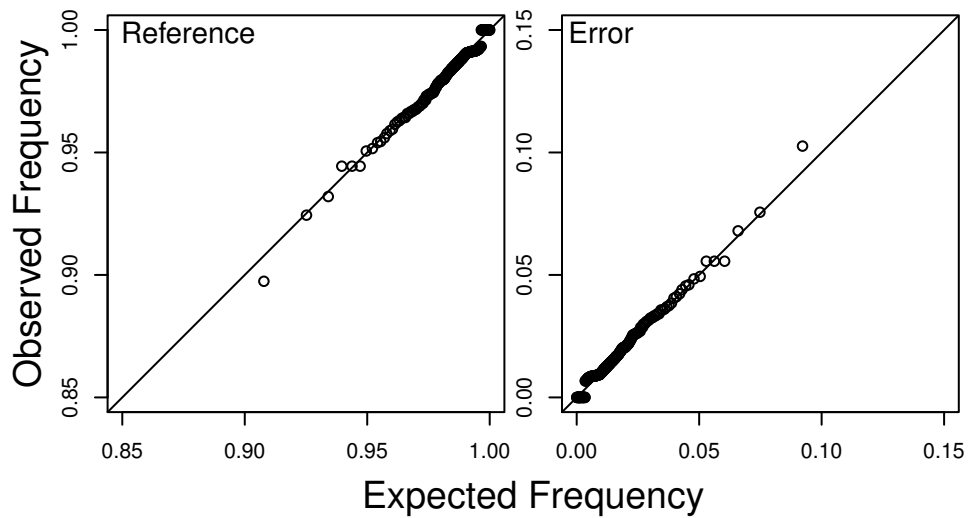

Figure S10: Mixtures of Dirichlet-multinomials provide the best fits to genomic data: CHM1 Chr21 RD.

### Mixture of 3 Dirichlet-Multinomials

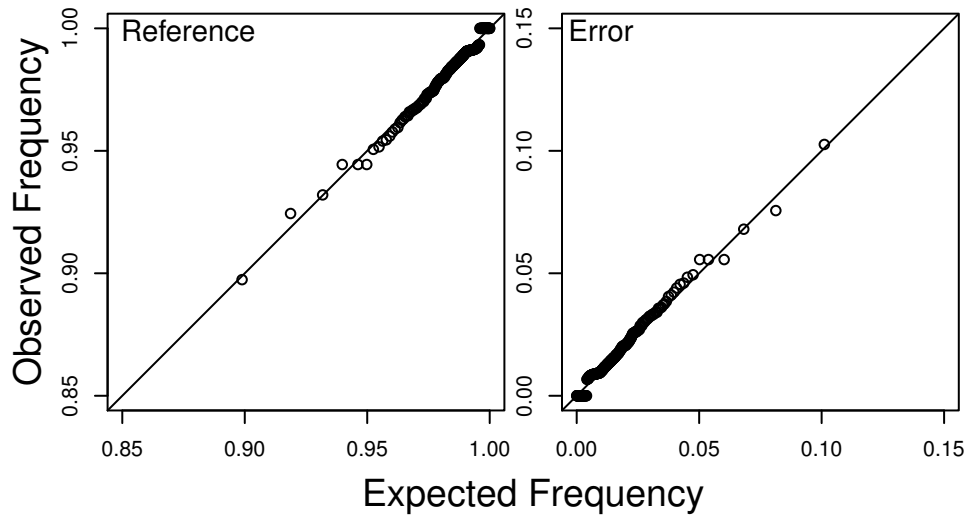

### Mixture of 4 Dirichlet-Multinomials

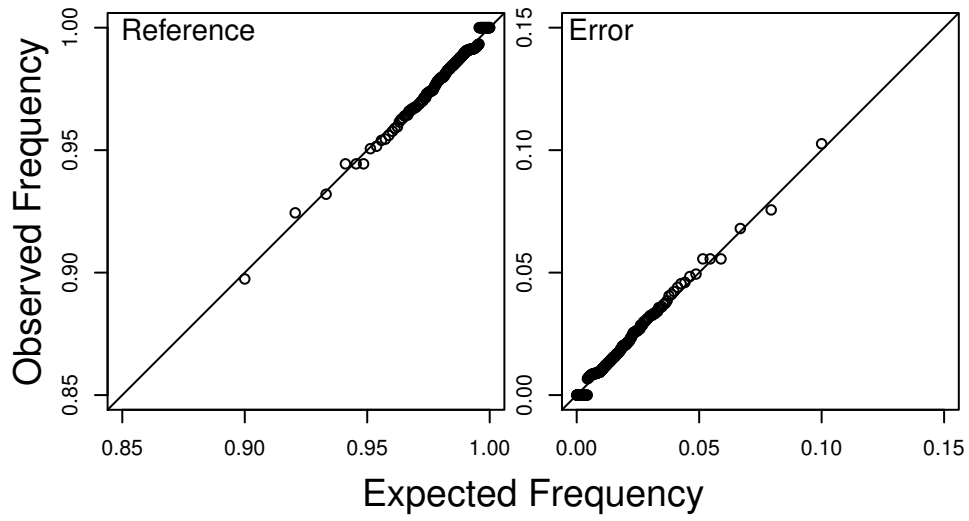

### Mixture of 5 Dirichlet-Multinomials

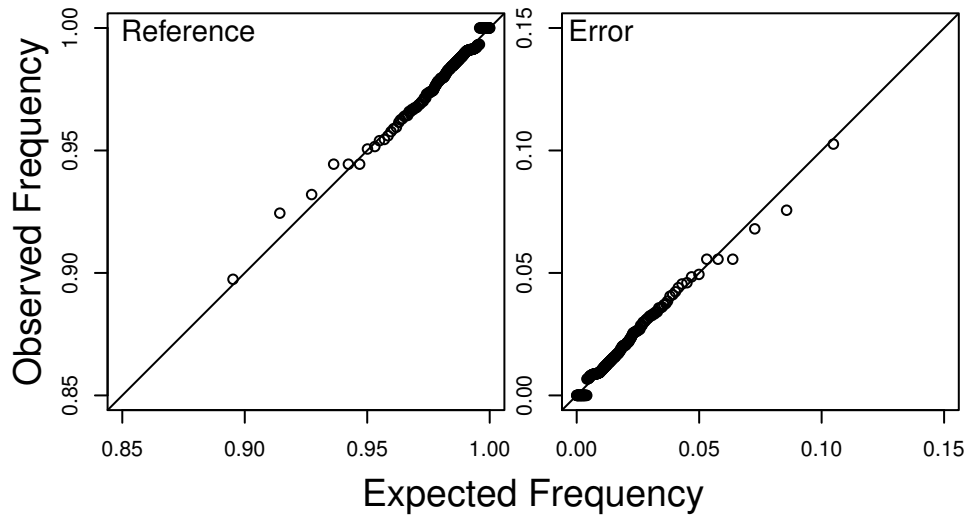

Figure S10 (Continued): **Mixtures of Dirichlet-multinomials provide the best fits to genomic data: CHM1 Chr21 RD.**

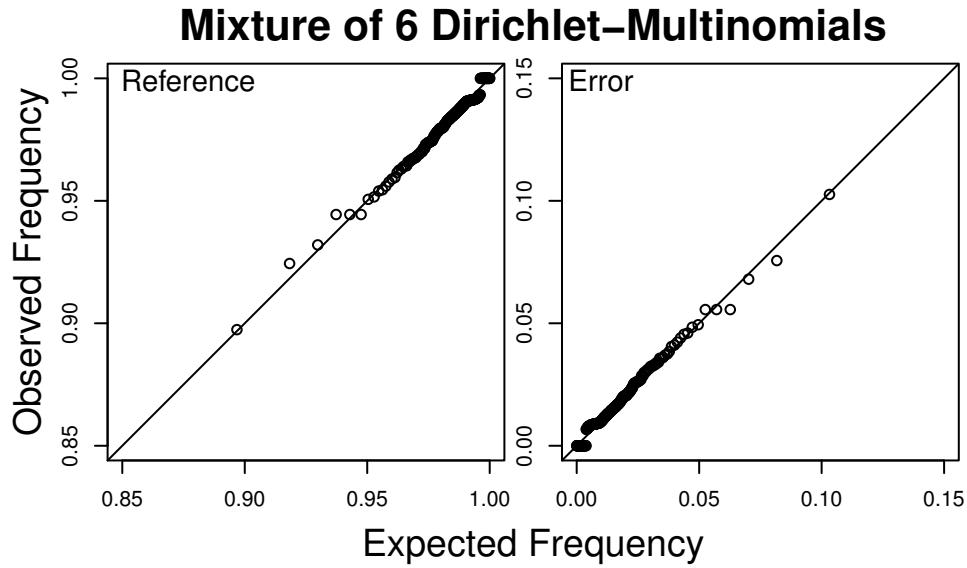

Figure S10 (Continued): **Mixtures of Dirichlet-multinomials provide the best fits to genomic data: CHM1 Chr21 RD.**

Table S1: **Number of heterozygous sites identified by different methods and the number of true heterozygous sites from 1000 Genomes Project.**

| Dataset     | Individual caller only | Trio caller only | Both callers (PH) | True heterozygotes (TH) |
|-------------|------------------------|------------------|-------------------|-------------------------|
| CEU13 Chr21 | 143                    | 1604             | 40956             | 30120                   |
| CEU13 Chr10 | 1652                   | 2645             | 38542             | 36590                   |
| CEU12 Chr21 | 151                    | 1171             | 38180             | 29983                   |
| CEU12 Chr10 | 106                    | 880              | 40144             | 36818                   |
| CEU11 Chr21 | 145                    | 1190             | 38107             | 29991                   |
| CEU11 Chr10 | 114                    | 867              | 40156             | 36825                   |
| CEU10 Chr21 | 6447                   | 4971             | 31773             | 28197                   |
| CEU10 Chr10 | 194                    | 1173             | 37108             | 35062                   |

Table S2: **Maximum likelihood results for different Dirichlet-Multinomial mixture models on homozygous data.**

FD: Full homozygous dataset; RD: Reference homozygous dataset;  $k$ : Number of components in the mixture; Bolded: Best model by AIC or BIC.

|            | $k$ | FD lnL   | RD lnL   | FD AIC          | RD AIC          | FD BIC          | RD BIC          |
|------------|-----|----------|----------|-----------------|-----------------|-----------------|-----------------|
| CHM1 Chr10 | 1   | -9741.81 | -8820.24 | 19489.62        | 17646.48        | 19515.40        | 17672.26        |
|            | 2   | -8941.66 | -8797.67 | 17897.32        | <b>17609.34</b> | <b>17957.48</b> | <b>17669.49</b> |
|            | 3   | -8932.63 | -8796.54 | <b>17887.27</b> | 17615.07        | 17981.80        | 17709.60        |
|            | 4   | -8931.64 | -8796.51 | 17893.28        | 17623.02        | 18022.18        | 17751.91        |
|            | 5   | -8931.58 | -8796.51 | 17901.17        | 17631.02        | 18064.44        | 17794.29        |
|            | 6   | -8931.63 | -8796.53 | 17909.26        | 17639.07        | 18106.91        | 17836.71        |
| CHM1 Chr21 | 1   | -8884.14 | -7705.50 | 17774.29        | 15417.01        | 17799.96        | 15442.68        |
|            | 2   | -8111.63 | -7680.10 | 16237.26        | <b>15374.20</b> | <b>16297.18</b> | <b>15434.12</b> |
|            | 3   | -8101.03 | -7678.67 | 16224.06        | 15379.34        | 16318.21        | 15473.49        |
|            | 4   | -8096.28 | -7678.67 | <b>16222.57</b> | 15387.34        | 16350.96        | 15515.73        |
|            | 5   | -8096.14 | -7678.67 | 16230.28        | 15395.34        | 16392.91        | 15557.96        |
|            | 6   | -8096.45 | -7678.67 | 16238.90        | 15403.34        | 16435.77        | 15600.20        |

Table S3: **Maximum likelihood results for different Dirichlet-Multinomial mixture models on heterozygous data.**

TH: True heterozygote dataset; PH: Potential heterozygote dataset;  $k$ : Number of components in the mixture; Bolded: Best model by AIC or BIC.

|             | $k$ | TH lnL      | PH lnL      | TH AIC            | PH AIC            | TH BIC            | PH BIC            |
|-------------|-----|-------------|-------------|-------------------|-------------------|-------------------|-------------------|
| CEU13 Chr21 | 1   | -680227.22  | -1049127.29 | 1360460.44        | 2098260.57        | 1360485.35        | 2098286.28        |
|             | 2   | -679553.35  | -1047190.51 | 1359120.71        | 2094395.02        | 1359178.84        | 2094455.01        |
|             | 3   | -679518.05  | -1046976.22 | 1359058.10        | 2093974.43        | <b>1359149.44</b> | 2094068.71        |
|             | 4   | -679503.99  | -1046863.10 | <b>1359037.99</b> | 2093756.19        | 1359162.55        | 2093884.75        |
|             | 5   | -679500.25  | -1046801.13 | 1359038.49        | 2093640.26        | 1359196.27        | 2093803.09        |
|             | 6   | -679499.16  | -1046759.39 | 1359044.32        | <b>2093564.77</b> | 1359235.31        | <b>2093761.89</b> |
| CEU13 Chr10 | 1   | -822125.53  | -861877.92  | 1644257.06        | 1723761.83        | 1644282.55        | 1723787.47        |
|             | 2   | -821819.67  | -861134.63  | 1643653.34        | 1722283.25        | <b>1643712.83</b> | 1722343.07        |
|             | 3   | -821806.53  | -861095.35  | <b>1643635.06</b> | <b>1722212.71</b> | 1643728.54        | <b>1722306.71</b> |
|             | 4   | -821803.92  | -861092.33  | 1643637.84        | 1722214.65        | 1643765.32        | 1722342.83        |
|             | 5   | -821802.52  | -861088.23  | 1643643.03        | 1722214.47        | 1643804.51        | 1722376.83        |
|             | 6   | -821801.14  | -861086.03  | 1643648.29        | 1722218.06        | 1643843.76        | 1722414.61        |
| CEU12 Chr10 | 1   | -1576846.58 | -1681522.38 | 3153699.16        | 3363050.76        | 3153724.69        | 3363076.53        |
|             | 2   | -1576531.60 | -1679609.04 | 3153077.20        | 3359232.08        | <b>3153136.77</b> | 3359292.21        |
|             | 3   | -1576517.22 | -1679519.20 | <b>3153056.44</b> | 3359060.39        | 3153150.04        | 3359154.88        |
|             | 4   | -1576513.59 | -1679490.33 | 3153057.18        | 3359010.66        | 3153184.83        | <b>3359139.50</b> |
|             | 5   | -1576510.84 | -1679484.47 | 3153059.69        | 3359006.94        | 3153221.37        | 3359170.15        |
|             | 6   | -1576508.61 | -1679473.47 | 3153063.22        | <b>3358992.95</b> | 3153258.94        | 3359190.51        |
| CEU12 Chr21 | 1   | -1295587.45 | -1567598.52 | 2591180.90        | 3135203.04        | 2591205.81        | 3135228.44        |
|             | 2   | -1294765.87 | -1564084.48 | 2589545.74        | 3128182.96        | <b>2589603.87</b> | 3128242.23        |
|             | 3   | -1294751.05 | -1563981.27 | 2589524.11        | 3127984.54        | 2589615.44        | 3128077.69        |
|             | 4   | -1294738.61 | -1563903.83 | <b>2589507.23</b> | 3127837.65        | 2589631.78        | 3127964.67        |
|             | 5   | -1294735.56 | -1563870.23 | 2589509.11        | 3127778.45        | 2589666.88        | <b>3127939.35</b> |
|             | 6   | -1294732.85 | -1563852.35 | 2589511.69        | <b>3127750.70</b> | 2589702.67        | 3127945.47        |
| CEU11 Chr10 | 1   | -1576118.74 | -1680591.96 | 3152243.47        | 3361189.92        | 3152269.00        | 3361215.69        |
|             | 2   | -1575808.42 | -1678712.33 | 3151630.84        | 3357438.67        | <b>3151690.41</b> | 3357498.80        |
|             | 3   | -1575793.38 | -1678620.74 | <b>3151608.77</b> | 3357263.48        | 3151702.38        | 3357357.97        |
|             | 4   | -1575789.85 | -1678591.80 | 3151609.70        | 3357213.59        | 3151737.34        | <b>3357342.44</b> |
|             | 5   | -1575786.15 | -1678585.13 | 3151610.30        | 3357208.25        | 3151771.99        | 3357371.46        |
|             | 6   | -1575785.32 | -1678576.67 | 3151616.63        | <b>3357199.34</b> | 3151812.36        | 3357396.90        |
| CEU11 Chr21 | 1   | -1295073.11 | -1564321.59 | 2590152.22        | 3128649.18        | 2590177.13        | 3128674.58        |
|             | 2   | -1294248.59 | -1560880.98 | 2588511.18        | 3121775.95        | <b>2588569.31</b> | 3121835.22        |
|             | 3   | -1294233.74 | -1560781.60 | 2588489.49        | 3121585.20        | 2588580.83        | 3121678.34        |
|             | 4   | -1294220.12 | -1560704.65 | <b>2588470.24</b> | 3121439.29        | 2588594.79        | 3121566.29        |
|             | 5   | -1294216.29 | -1560669.63 | 2588470.58        | 3121377.27        | 2588628.35        | <b>3121538.13</b> |
|             | 6   | -1294214.05 | -1560651.10 | 2588474.10        | <b>3121348.19</b> | 2588665.08        | 3121542.93        |
| CEU10 Chr10 | 1   | -786319.70  | -838669.52  | 1572645.39        | 1677345.03        | 1572670.77        | 1677370.56        |
|             | 2   | -786283.09  | -838295.21  | 1572580.18        | 1676604.41        | <b>1572639.38</b> | 1676663.98        |
|             | 3   | -786279.14  | -838241.95  | 1572580.28        | 1676505.89        | 1572673.32        | <b>1676599.49</b> |
|             | 4   | -786272.06  | -838223.33  | <b>1572574.12</b> | 1676476.66        | 1572700.98        | 1676604.30        |
|             | 5   | -786271.18  | -838218.88  | 1572580.36        | <b>1676475.77</b> | 1572741.05        | 1676637.44        |
|             | 6   | -786271.55  | -838215.94  | 1572589.10        | 1676477.87        | 1572783.63        | 1676673.58        |
| CEU10 Chr21 | 1   | -609177.81  | -741752.33  | 1218361.61        | 1483510.67        | 1218386.32        | 1483535.69        |
|             | 2   | -609069.60  | -740874.49  | 1218153.20        | 1481762.98        | <b>1218210.86</b> | 1481821.36        |
|             | 3   | -609057.91  | -740685.21  | <b>1218137.82</b> | 1481392.42        | 1218228.43        | 1481484.15        |
|             | 4   | -609057.53  | -740660.48  | 1218145.05        | 1481350.95        | 1218268.61        | <b>1481476.04</b> |
|             | 5   | -609057.09  | -740641.97  | 1218152.19        | 1481321.95        | 1218308.69        | 1481480.39        |
|             | 6   | -609056.88  | -740630.74  | 1218159.75        | <b>1481307.48</b> | 1218349.21        | 1481499.28        |

Table S4: **Maximum likelihood parameter estimates for several homozygous models on CHM1 Chr10.**

FD: Full homozygous dataset; RD: Reference homozygous dataset;  $k$ : Number of components in the mixture; M: Multinomial model;  $\pi_{ref}$ : frequency of reference base calls;  $\pi_{err}$ : frequency of error base calls;  $\alpha_{ref}$ : concentration parameter for reference base calls;  $\alpha_{err}$ : concentration parameter for error base calls;  $\varphi$ : dispersion parameter;  $\rho$ : frequency of component in mixture model; ML- $\rho$ : frequency of component when using maximum-likelihood assignment

| $k$ | Data | $\pi_{ref}$ | $\pi_{err}$ | $\alpha_{ref}$ | $\alpha_{err}$ | $\varphi$ | $\rho$   | ML- $\rho$ |
|-----|------|-------------|-------------|----------------|----------------|-----------|----------|------------|
| M   | RD   | 1.00        | 0.000286    | Inf            | Inf            | 0.00      | 1.00     | 1.00       |
| 1   | FD   | 0.999       | 0.00122     | 6.23           | 0.00761        | 0.138     | 1.00     | 1.00       |
| 1   | RD   | 1.00        | 0.000289    | 190.           | 0.0551         | 0.00522   | 1.00     | 1.00       |
| 2   | FD   | 1.00        | 0.000282    | 240.           | 0.0676         | 0.00415   | 0.984    | 0.999      |
|     |      | 0.975       | 0.0254      | 0.0534         | 0.00139        | 0.948     | 0.0164   | 0.000978   |
| 2   | RD   | 1.00        | 0.000260    | 370.           | 0.0961         | 0.00269   | 0.942    | 0.997      |
|     |      | 0.999       | 0.000833    | 20.0           | 0.0167         | 0.0475    | 0.0585   | 0.00324    |
| 3   | FD   | 1.00        | 0.000253    | 372.           | 0.0940         | 0.00268   | 0.964    | 0.979      |
|     |      | 0.999       | 0.00134     | 21.3           | 0.0287         | 0.0447    | 0.0359   | 0.0205     |
|     |      | 0.0836      | 0.916       | 0.0129         | 0.141          | 0.867     | 0.000379 | 0.000502   |
| 3   | RD   | 1.00        | 0.000246    | 415.           | 0.102          | 0.00240   | 0.998    | 0.979      |
|     |      | 0.976       | 0.0244      | 395.           | 9.87           | 0.00246   | 0.00147  | 0.0206     |
|     |      | 0.859       | 0.141       | Inf            | Inf            | 0.00      | 9.34e-05 | 0.000201   |
| 4   | FD   | 1.00        | 0.000464    | 0.0115         | 5.35e-06       | 0.989     | 0.745    | 0.979      |
|     |      | 0.999       | 0.000964    | 656.           | 0.633          | 0.00152   | 0.253    | 0.00       |
|     |      | 0.974       | 0.0259      | 1.93e+03       | 51.4           | 0.000504  | 0.00139  | 0.0206     |
|     |      | 0.862       | 0.138       | Inf            | Inf            | 0.00      | 9.50e-05 | 0.000201   |
| 4   | RD   | 1.00        | 0.000228    | 465.           | 0.106          | 0.00215   | 0.920    | 0.979      |
|     |      | 0.999       | 0.000623    | 127.           | 0.0794         | 0.00779   | 0.0790   | 0.00       |
|     |      | 0.968       | 0.0318      | Inf            | Inf            | 0.00      | 0.000684 | 0.0206     |
|     |      | 0.859       | 0.141       | Inf            | Inf            | 0.00      | 9.35e-05 | 0.000176   |
| 5   | FD   | 1.00        | 0.000265    | 382.           | 0.101          | 0.00261   | 0.950    | 0.00364    |
|     |      | 0.993       | 0.00714     | 0.0115         | 8.29e-05       | 0.989     | 0.0485   | 0.976      |
|     |      | 0.970       | 0.0301      | Inf            | Inf            | 0.00      | 0.000943 | 0.00750    |
|     |      | 0.860       | 0.140       | Inf            | Inf            | 0.00      | 9.01e-05 | 0.000176   |
|     |      | 0.996       | 0.00395     | 569.           | 2.26           | 0.00175   | 4.06e-07 | 0.0131     |
| 5   | RD   | 1.00        | 0.000249    | 357.           | 0.0889         | 0.00279   | 0.980    | 0.979      |
|     |      | 1.00        | 0.000487    | Inf            | Inf            | 0.00      | 0.0187   | 0.00       |
|     |      | 0.969       | 0.0306      | Inf            | Inf            | 0.00      | 0.000904 | 0.00316    |
|     |      | 0.860       | 0.140       | Inf            | Inf            | 0.00      | 9.42e-05 | 0.000176   |
|     |      | 0.987       | 0.0129      | 205.           | 2.69           | 0.00478   | 4.12e-06 | 0.0174     |
| 6   | FD   | 1.00        | 0.000194    | 74.2           | 0.0144         | 0.0133    | 0.502    | 0.979      |
|     |      | 1.00        | 0.000368    | 713.           | 0.263          | 0.00140   | 0.498    | 0.00       |
|     |      | 0.113       | 0.887       | 0.0122         | 0.0955         | 0.903     | 0.000389 | 0.000351   |
|     |      | 0.995       | 0.00506     | 778.           | 3.96           | 0.00128   | 0.000159 | 0.0203     |
|     |      | 0.860       | 0.140       | Inf            | Inf            | 0.00      | 8.85e-05 | 0.000426   |
|     |      | 0.530       | 0.470       | 0.0149         | 0.0132         | 0.973     | 2.64e-06 | 0.00       |
| 6   | RD   | 1.00        | 0.000250    | 389.           | 0.0972         | 0.00256   | 0.998    | 0.979      |
|     |      | 0.996       | 0.00379     | 94.1           | 0.358          | 0.0105    | 0.000895 | 0.00113    |
|     |      | 0.969       | 0.0307      | 2.57e+04       | 814.           | 3.77e-05  | 0.000729 | 0.000953   |
|     |      | 0.972       | 0.0276      | 2.17e+03       | 61.4           | 0.000449  | 0.000204 | 0.0185     |
|     |      | 0.855       | 0.145       | Inf            | Inf            | 0.00      | 9.05e-05 | 0.000176   |
|     |      | 1.00        | 0.000316    | 2.05e+03       | 0.646          | 0.000489  | 4.29e-05 | 0.00       |



Table S5: **Maximum likelihood parameter estimates for several homozygous models on CHM1 Chr21.**

| $k$ | Data | $\pi_{ref}$ | $\pi_{err}$ | $\alpha_{ref}$ | $\alpha_{err}$ | $\varphi$ | $\rho$   | ML- $\rho$ |
|-----|------|-------------|-------------|----------------|----------------|-----------|----------|------------|
| M   | RD   | 1.00        | 0.000255    | Inf            | Inf            | 0.00      | 1.00     | 1.00       |
| 1   | FD   | 0.999       | 0.00129     | 5.18           | 0.00667        | 0.162     | 1.00     | 1.00       |
| 1   | RD   | 1.00        | 0.000256    | 273.           | 0.0697         | 0.00365   | 1.00     | 1.00       |
| 2   | FD   | 1.00        | 0.000249    | 396.           | 0.0987         | 0.00252   | 0.972    | 0.995      |
|     |      | 0.982       | 0.0176      | 0.119          | 0.00214        | 0.892     | 0.0278   | 0.00485    |
| 2   | RD   | 1.00        | 0.000220    | Inf            | Inf            | 0.00      | 0.751    | 0.808      |
|     |      | 1.00        | 0.000361    | 64.5           | 0.0233         | 0.0153    | 0.249    | 0.192      |
| 3   | FD   | 0.999       | 0.000615    | 0.100          | 6.16e-05       | 0.909     | 0.745    | 0.981      |
|     |      | 0.999       | 0.000804    | Inf            | Inf            | 0.00      | 0.253    | 0.00       |
|     |      | 0.981       | 0.0192      | Inf            | Inf            | 0.00      | 0.00224  | 0.0191     |
| 3   | RD   | 1.00        | 0.000185    | Inf            | Inf            | 0.00      | 0.995    | 0.981      |
|     |      | 0.986       | 0.0141      | Inf            | Inf            | 0.00      | 0.00446  | 0.0187     |
|     |      | 0.926       | 0.0742      | Inf            | Inf            | 0.00      | 0.000101 | 0.000441   |
| 4   | FD   | 1.00        | 0.000185    | 2.25e+04       | 4.16           | 4.44e-05  | 0.994    | 0.980      |
|     |      | 0.987       | 0.0130      | 512.           | 6.77           | 0.00192   | 0.00497  | 0.0191     |
|     |      | 0.00453     | 0.995       | 0.274          | 60.3           | 0.0162    | 0.000363 | 0.000363   |
|     |      | 0.766       | 0.234       | 6.39           | 1.96           | 0.107     | 0.000234 | 0.000259   |
| 4   | RD   | 1.00        | 0.000185    | Inf            | Inf            | 0.00      | 0.995    | 0.981      |
|     |      | 0.986       | 0.0141      | Inf            | Inf            | 0.00      | 0.00446  | 0.0187     |
|     |      | 0.926       | 0.0742      | Inf            | Inf            | 0.00      | 0.000101 | 0.000441   |
|     |      | 1.00        | 0.000405    | 384.           | 0.156          | 0.00259   | 1.00e-06 | 0.00       |
| 5   | FD   | 1.00        | 0.000188    | 1.39e+04       | 2.62           | 7.17e-05  | 0.995    | 0.980      |
|     |      | 0.985       | 0.0146      | Inf            | Inf            | 0.00      | 0.00401  | 0.0191     |
|     |      | 0.984       | 0.0156      | 3.81           | 0.0604         | 0.205     | 0.000842 | 0.00       |
|     |      | 0.00453     | 0.995       | 0.274          | 60.3           | 0.0162    | 0.000363 | 0.000363   |
|     |      | 0.754       | 0.246       | 6.13           | 2.00           | 0.110     | 0.000181 | 0.000234   |
| 5   | RD   | 1.00        | 0.000185    | Inf            | Inf            | 0.00      | 0.995    | 0.981      |
|     |      | 0.986       | 0.0141      | Inf            | Inf            | 0.00      | 0.00446  | 0.0187     |
|     |      | 1.00        | 0.000411    | 1.31e+03       | 0.540          | 0.000761  | 0.000130 | 0.00       |
|     |      | 0.926       | 0.0742      | Inf            | Inf            | 0.00      | 0.000101 | 0.000441   |
|     |      | 0.999       | 0.000912    | 447.           | 0.408          | 0.00223   | 4.17e-09 | 0.00       |
| 6   | FD   | 1.00        | 0.000188    | 1.30e+04       | 2.45           | 7.68e-05  | 0.995    | 0.980      |
|     |      | 0.985       | 0.0146      | Inf            | Inf            | 0.00      | 0.00320  | 0.0161     |
|     |      | 0.985       | 0.0148      | Inf            | Inf            | 0.00      | 0.000800 | 0.00285    |
|     |      | 0.00453     | 0.995       | 0.274          | 60.3           | 0.0162    | 0.000363 | 0.000363   |
|     |      | 0.832       | 0.168       | 3.91           | 0.791          | 0.176     | 0.000337 | 0.000389   |
|     |      | 0.999       | 0.000754    | 172.           | 0.130          | 0.00576   | 0.000117 | 0.00       |
| 6   | RD   | 1.00        | 0.000185    | Inf            | Inf            | 0.00      | 0.995    | 0.00       |
|     |      | 0.986       | 0.0141      | Inf            | Inf            | 0.00      | 0.00444  | 0.0163     |
|     |      | 1.00        | 2.58e-05    | Inf            | Inf            | 0.00      | 0.000851 | 0.981      |
|     |      | 0.926       | 0.0742      | Inf            | Inf            | 0.00      | 0.000101 | 0.000389   |
|     |      | 0.985       | 0.0154      | Inf            | Inf            | 0.00      | 1.73e-05 | 0.00252    |
|     |      | 1.00        | 0.000423    | Inf            | Inf            | 0.00      | 8.07e-06 | 0.00       |

Table S6: **Maximum likelihood parameter estimates for several heterozygous models on CEU13 Chr10.**

TH: True heterozygous dataset; PH: Potential heterozygous dataset;  $k$ : Number of components in the mixture; M: Multinomial model; BM: Biased multinomial model;  $\pi_{ref}$ : frequency of reference base calls;  $\pi_{alt}$ : frequency of alternative base calls;  $\pi_{err}$ : frequency of error base calls;  $\alpha_{ref}$ : concentration parameter for reference base calls;  $\alpha_{alt}$ : concentration parameter for alternative base calls;  $\alpha_{err}$ : concentration parameter for error base calls;  $\varphi$ : dispersion parameter;  $\rho$ : frequency of component in mixture model; ML- $\rho$ : frequency of component when using maximum-likelihood assignment

| $k$ | Data | $\pi_{ref}$ | $\pi_{alt}$ | $\pi_{err}$ | $\alpha_{ref}$ | $\alpha_{alt}$ | $\alpha_{err}$ | $\varphi$ | $\rho$    | ML- $\rho$ |
|-----|------|-------------|-------------|-------------|----------------|----------------|----------------|-----------|-----------|------------|
| M   | TH   | 0.4998      | 0.4998      | 0.0004489   | Inf            | Inf            | Inf            | 0.000     | 1.000     | 1.000      |
| BM  | TH   | 0.5021      | 0.4974      | 0.0004489   | Inf            | Inf            | Inf            | 0.000     | 1.000     | 1.000      |
| 1   | TH   | 0.5022      | 0.4974      | 0.0003694   | 149.4          | 148.0          | 0.1099         | 0.003350  | 1.000     | 1.000      |
| 1   | PH   | 0.5031      | 0.4964      | 0.0004475   | 73.28          | 72.30          | 0.06517        | 0.006819  | 1.000     | 1.000      |
| 2   | TH   | 0.5022      | 0.4975      | 0.0003361   | 1174.          | 1163.          | 0.7857         | 0.0004276 | 0.9925    | 0.8482     |
|     |      | 0.5041      | 0.4897      | 0.006212    | 3.551          | 3.450          | 0.04377        | 0.1243    | 0.007537  | 0.1518     |
| 2   | PH   | 0.5029      | 0.4968      | 0.0003283   | 767.8          | 758.6          | 0.5013         | 0.0006545 | 0.9761    | 0.8449     |
|     |      | 0.5112      | 0.4797      | 0.009143    | 3.886          | 3.647          | 0.06951        | 0.1162    | 0.02391   | 0.1551     |
| 3   | TH   | 0.5021      | 0.4976      | 0.0003426   | 4868.          | 4825.          | 3.321          | 0.0001031 | 0.9808    | 0.7949     |
|     |      | 0.5130      | 0.4865      | 0.0004879   | 7.228          | 6.855          | 0.006875       | 0.06627   | 0.01897   | 0.1983     |
|     |      | 0.3012      | 0.4273      | 0.2715      | 3.192          | 4.528          | 2.877          | 0.08622   | 0.0002831 | 0.006757   |
| 3   | PH   | 0.5023      | 0.4974      | 0.0003417   | Inf            | Inf            | Inf            | 0.000     | 0.9496    | 0.7835     |
|     |      | 0.5229      | 0.4757      | 0.001465    | 7.662          | 6.970          | 0.02147        | 0.06389   | 0.04922   | 0.2055     |
|     |      | 0.2993      | 0.4848      | 0.2159      | 3.121          | 5.056          | 2.252          | 0.08749   | 0.001208  | 0.01100    |
| 4   | TH   | 0.5021      | 0.4975      | 0.0003420   | 1139.          | 1128.          | 0.7755         | 0.0004408 | 0.9937    | 0.7739     |
|     |      | 0.4078      | 0.5910      | 0.001191    | 5.389          | 7.810          | 0.01574        | 0.07035   | 0.003917  | 0.1360     |
|     |      | 0.7484      | 0.2516      | 1.349e-13   | 5.610e+07      | 1.886e+07      | 1.011e-05      | 1.334e-08 | 0.002079  | 0.08268    |
|     |      | 0.3080      | 0.4266      | 0.2654      | 3.202          | 4.435          | 2.758          | 0.08776   | 0.0002939 | 0.007418   |
| 4   | PH   | 0.5023      | 0.4974      | 0.0003456   | Inf            | Inf            | Inf            | 0.000     | 0.9511    | 0.7415     |
|     |      | 0.5290      | 0.4700      | 0.0009964   | 7.912          | 7.029          | 0.01490        | 0.06267   | 0.04643   | 0.1320     |
|     |      | 0.3191      | 0.4786      | 0.2023      | 3.101          | 4.652          | 1.967          | 0.09328   | 0.001372  | 0.009973   |
|     |      | 0.2978      | 0.6981      | 0.004057    | Inf            | Inf            | Inf            | 0.000     | 0.001127  | 0.1165     |
| 5   | TH   | 0.5021      | 0.4976      | 0.0003412   | 1359.          | 1347.          | 0.9237         | 0.0003692 | 0.9937    | 0.7490     |
|     |      | 0.7279      | 0.2721      | 1.968e-13   | 1350.          | 504.5          | 3.650e-10      | 0.0005390 | 0.002797  | 0.1022     |
|     |      | 0.3923      | 0.6077      | 9.512e-12   | 4.240          | 6.569          | 1.028e-10      | 0.08469   | 0.002008  | 0.0006894  |
|     |      | 0.3172      | 0.6811      | 0.001642    | Inf            | Inf            | Inf            | 0.000     | 0.001216  | 0.1413     |
|     |      | 0.3193      | 0.4333      | 0.2473      | 3.219          | 4.368          | 2.493          | 0.09026   | 0.0003254 | 0.006867   |
| 5   | PH   | 0.5015      | 0.4982      | 0.0003431   | 6676.          | 6633.          | 4.567          | 7.511e-05 | 0.9634    | 0.6692     |
|     |      | 0.6009      | 0.3983      | 0.0008334   | 16.63          | 11.02          | 0.02307        | 0.03487   | 0.02926   | 0.1958     |
|     |      | 0.3000      | 0.6985      | 0.001459    | Inf            | Inf            | Inf            | 0.000     | 0.004281  | 0.1191     |
|     |      | 0.3362      | 0.4773      | 0.1864      | 3.153          | 4.476          | 1.748          | 0.09637   | 0.001591  | 0.01197    |
|     |      | 0.3572      | 0.6428      | 1.207e-11   | 3.672          | 6.609          | 1.241e-10      | 0.08864   | 0.001474  | 0.003921   |
| 6   | TH   | 0.5019      | 0.4977      | 0.0003358   | 7033.          | 6974.          | 4.705          | 7.137e-05 | 0.9905    | 0.6602     |
|     |      | 0.6759      | 0.3241      | 2.719e-13   | 55.93          | 26.82          | 2.250e-11      | 0.01194   | 0.005647  | 0.1619     |
|     |      | 0.3330      | 0.6660      | 0.0009848   | Inf            | Inf            | Inf            | 0.000     | 0.002714  | 0.1616     |
|     |      | 0.2642      | 0.7358      | 6.057e-13   | 5.362          | 14.94          | 1.229e-11      | 0.04695   | 0.0006687 | 0.005129   |
|     |      | 0.2956      | 0.4218      | 0.2826      | 3.261          | 4.654          | 3.117          | 0.08311   | 0.0002766 | 0.0003034  |
|     |      | 0.4908      | 0.4708      | 0.03843     | Inf            | Inf            | Inf            | 0.000     | 0.0002350 | 0.01081    |
| 6   | PH   | 0.5015      | 0.4981      | 0.0003495   | 2.703e+04      | 2.685e+04      | 18.84          | 1.855e-05 | 0.9595    | 0.6548     |
|     |      | 0.6041      | 0.3959      | 1.659e-10   | 18.70          | 12.26          | 5.137e-09      | 0.03129   | 0.02522   | 0.2078     |
|     |      | 0.4696      | 0.5304      | 3.594e-08   | 5.491          | 6.203          | 4.203e-07      | 0.07878   | 0.01051   | 0.007184   |
|     |      | 0.3007      | 0.6968      | 0.002499    | Inf            | Inf            | Inf            | 0.000     | 0.002618  | 0.1185     |
|     |      | 0.5582      | 0.3668      | 0.07494     | 11.30          | 7.427          | 1.517          | 0.04707   | 0.001127  | 0.01060    |
|     |      | 0.2544      | 0.5173      | 0.2283      | 3.403          | 6.921          | 3.055          | 0.06955   | 0.0009985 | 0.001105   |

Table S7: Maximum likelihood parameter estimates for several heterozygous models on CEU13 Chr21.

| $k$ | Data | $\pi_{ref}$ | $\pi_{alt}$ | $\pi_{err}$ | $\alpha_{ref}$ | $\alpha_{alt}$ | $\alpha_{err}$ | $\varphi$ | $\rho$    | ML- $\rho$ |
|-----|------|-------------|-------------|-------------|----------------|----------------|----------------|-----------|-----------|------------|
| M   | TH   | 0.4996      | 0.4996      | 0.0007413   | Inf            | Inf            | Inf            | 0.000     | 1.000     | 1.000      |
| BM  | TH   | 0.5035      | 0.4958      | 0.0007413   | Inf            | Inf            | Inf            | 0.000     | 1.000     | 1.000      |
| 1   | TH   | 0.5038      | 0.4958      | 0.0004158   | 57.43          | 56.52          | 0.04740        | 0.008696  | 1.000     | 1.000      |
| 1   | PH   | 0.5279      | 0.4711      | 0.0009801   | 10.61          | 9.472          | 0.01970        | 0.04739   | 1.000     | 1.000      |
| 2   | TH   | 0.5038      | 0.4958      | 0.0003342   | 682.3          | 671.4          | 0.4525         | 0.0007379 | 0.9603    | 0.8147     |
|     |      | 0.5014      | 0.4959      | 0.002686    | 4.680          | 4.629          | 0.02507        | 0.09677   | 0.03968   | 0.1853     |
| 2   | PH   | 0.4992      | 0.5005      | 0.0003619   | Inf            | Inf            | Inf            | 0.000     | 0.5780    | 0.7012     |
|     |      | 0.5608      | 0.4373      | 0.001863    | 5.983          | 4.666          | 0.01987        | 0.08569   | 0.4220    | 0.2988     |
| 3   | TH   | 0.5036      | 0.4960      | 0.0003526   | 2049.          | 2018.          | 1.435          | 0.0002457 | 0.9390    | 0.7829     |
|     |      | 0.5080      | 0.4914      | 0.0005265   | 6.862          | 6.638          | 0.007111       | 0.06893   | 0.06044   | 0.2130     |
|     |      | 0.2391      | 0.4825      | 0.2784      | 3.407          | 6.876          | 3.967          | 0.06558   | 0.0005865 | 0.004120   |
| 3   | PH   | 0.5047      | 0.4949      | 0.0003515   | 122.6          | 120.2          | 0.08539        | 0.004100  | 0.7425    | 0.7017     |
|     |      | 0.4928      | 0.5034      | 0.003834    | 4.602          | 4.701          | 0.03580        | 0.09672   | 0.1627    | 0.1239     |
|     |      | 0.7471      | 0.2524      | 0.0005183   | 108.2          | 36.56          | 0.07506        | 0.006858  | 0.09479   | 0.1744     |
| 4   | TH   | 0.5032      | 0.4965      | 0.0003518   | 382.5          | 377.4          | 0.2674         | 0.001314  | 0.9857    | 0.8037     |
|     |      | 0.7252      | 0.2748      | 1.877e-13   | 193.4          | 73.28          | 5.007e-11      | 0.003736  | 0.008887  | 0.1176     |
|     |      | 0.2426      | 0.7567      | 0.0006698   | 66.99          | 209.0          | 0.1850         | 0.003608  | 0.004737  | 0.07333    |
|     |      | 0.2543      | 0.4884      | 0.2572      | 3.393          | 6.517          | 3.432          | 0.06973   | 0.0006832 | 0.005393   |
| 4   | PH   | 0.5036      | 0.4960      | 0.0004012   | Inf            | Inf            | Inf            | 0.000     | 0.5961    | 0.6771     |
|     |      | 0.5244      | 0.4744      | 0.001256    | 6.993          | 6.325          | 0.01674        | 0.06976   | 0.3464    | 0.1854     |
|     |      | 0.7743      | 0.2252      | 0.0005180   | Inf            | Inf            | Inf            | 0.000     | 0.05511   | 0.1269     |
|     |      | 0.3176      | 0.4197      | 0.2627      | 3.514          | 4.644          | 2.907          | 0.08288   | 0.002399  | 0.01057    |
| 5   | TH   | 0.5036      | 0.4961      | 0.0003458   | 386.5          | 380.7          | 0.2654         | 0.001301  | 0.9855    | 0.7382     |
|     |      | 0.7407      | 0.2593      | 7.194e-14   | 2236.          | 783.1          | 2.172e-10      | 0.0003311 | 0.007506  | 0.09755    |
|     |      | 0.2262      | 0.7738      | 7.870e-14   | 136.5          | 467.1          | 4.750e-11      | 0.001654  | 0.003360  | 0.01142    |
|     |      | 0.3279      | 0.6690      | 0.003110    | Inf            | Inf            | Inf            | 0.000     | 0.002962  | 0.1503     |
|     |      | 0.2541      | 0.4880      | 0.2579      | 3.403          | 6.536          | 3.453          | 0.06948   | 0.0006817 | 0.002479   |
| 5   | PH   | 0.4988      | 0.5009      | 0.0003695   | 360.7          | 362.3          | 0.2673         | 0.001381  | 0.7264    | 0.5190     |
|     |      | 0.6432      | 0.3561      | 0.0007526   | 74.41          | 41.20          | 0.08706        | 0.008570  | 0.1300    | 0.2247     |
|     |      | 0.3627      | 0.6364      | 0.0009410   | 9.229          | 16.20          | 0.02395        | 0.03781   | 0.07374   | 0.1588     |
|     |      | 0.7812      | 0.2185      | 0.0003504   | Inf            | Inf            | Inf            | 0.000     | 0.06494   | 0.08141    |
|     |      | 0.4161      | 0.4103      | 0.1736      | 3.510          | 3.462          | 1.465          | 0.1060    | 0.004912  | 0.01607    |
| 6   | TH   | 0.5078      | 0.4919      | 0.0003247   | 813.0          | 787.6          | 0.5198         | 0.0006242 | 0.9052    | 0.4932     |
|     |      | 0.4533      | 0.5462      | 0.0005582   | Inf            | Inf            | Inf            | 0.000     | 0.08075   | 0.3049     |
|     |      | 0.7323      | 0.2677      | 2.838e-13   | 341.8          | 124.9          | 1.324e-10      | 0.002138  | 0.008270  | 0.1057     |
|     |      | 0.2219      | 0.7781      | 8.791e-14   | 359.2          | 1260.          | 1.423e-10      | 0.0006174 | 0.003176  | 0.01002    |
|     |      | 0.3160      | 0.6805      | 0.003556    | Inf            | Inf            | Inf            | 0.000     | 0.001938  | 0.08318    |
|     |      | 0.2584      | 0.4886      | 0.2530      | 3.378          | 6.389          | 3.308          | 0.07105   | 0.0007006 | 0.002914   |
| 6   | PH   | 0.5010      | 0.4987      | 0.0003355   | 5937.          | 5910.          | 3.976          | 8.438e-05 | 0.7094    | 0.4596     |
|     |      | 0.6385      | 0.3608      | 0.0007513   | 74.62          | 42.17          | 0.08781        | 0.008484  | 0.1378    | 0.2235     |
|     |      | 0.3720      | 0.6274      | 0.0006599   | 169.3          | 285.6          | 0.3004         | 0.002192  | 0.06812   | 0.1939     |
|     |      | 0.7806      | 0.2191      | 0.0003489   | Inf            | Inf            | Inf            | 0.000     | 0.06624   | 0.08251    |
|     |      | 0.2149      | 0.7848      | 0.0002883   | 97.88          | 357.5          | 0.1313         | 0.002191  | 0.01289   | 0.02454    |
|     |      | 0.4194      | 0.4209      | 0.1598      | 3.492          | 3.504          | 1.330          | 0.1072    | 0.005488  | 0.01596    |

Table S8: Maximum likelihood parameter estimates for several heterozygous models on CEU12 Chr10.

| $k$ | Data | $\pi_{ref}$ | $\pi_{alt}$ | $\pi_{err}$ | $\alpha_{ref}$ | $\alpha_{alt}$ | $\alpha_{err}$ | $\varphi$ | $\rho$    | ML- $\rho$ |
|-----|------|-------------|-------------|-------------|----------------|----------------|----------------|-----------|-----------|------------|
| M   | TH   | 0.4998      | 0.4998      | 0.0003800   | Inf            | Inf            | Inf            | 0.000     | 1.000     | 1.000      |
| BM  | TH   | 0.5087      | 0.4909      | 0.0003800   | Inf            | Inf            | Inf            | 0.000     | 1.000     | 1.000      |
| 1   | TH   | 0.5087      | 0.4909      | 0.0003461   | 237.0          | 228.7          | 0.1612         | 0.002142  | 1.000     | 1.000      |
| 1   | PH   | 0.5141      | 0.4854      | 0.0004806   | 63.86          | 60.30          | 0.05970        | 0.007986  | 1.000     | 1.000      |
| 2   | TH   | 0.5083      | 0.4914      | 0.0003188   | 918.9          | 888.4          | 0.5763         | 0.0005528 | 0.9862    | 0.8508     |
|     |      | 0.5396      | 0.4574      | 0.003047    | 6.558          | 5.559          | 0.03704        | 0.07602   | 0.01379   | 0.1492     |
| 2   | PH   | 0.5090      | 0.4907      | 0.0003057   | 2520.          | 2429.          | 1.513          | 0.0002020 | 0.9182    | 0.8220     |
|     |      | 0.5719      | 0.4245      | 0.003634    | 7.547          | 5.603          | 0.04796        | 0.07043   | 0.08181   | 0.1780     |
| 3   | TH   | 0.5078      | 0.4918      | 0.0003199   | 845.6          | 818.9          | 0.5326         | 0.0006002 | 0.9915    | 0.8215     |
|     |      | 0.6690      | 0.3304      | 0.0006527   | 88.31          | 43.61          | 0.08616        | 0.007518  | 0.006350  | 0.1162     |
|     |      | 0.4452      | 0.5343      | 0.02058     | 2.744          | 3.294          | 0.1269         | 0.1396    | 0.002156  | 0.06234    |
| 3   | PH   | 0.5081      | 0.4916      | 0.0003190   | Inf            | Inf            | Inf            | 0.000     | 0.9017    | 0.8045     |
|     |      | 0.5728      | 0.4256      | 0.001665    | 10.38          | 7.716          | 0.03019        | 0.05227   | 0.09660   | 0.1884     |
|     |      | 0.3862      | 0.3923      | 0.2215      | 4.669          | 4.742          | 2.678          | 0.07640   | 0.001678  | 0.007125   |
| 4   | TH   | 0.5079      | 0.4918      | 0.0003211   | 891.4          | 863.2          | 0.5636         | 0.0005694 | 0.9906    | 0.7604     |
|     |      | 0.6662      | 0.3330      | 0.0008793   | 69.75          | 34.86          | 0.09206        | 0.009461  | 0.007008  | 0.1204     |
|     |      | 0.3893      | 0.6107      | 1.633e-11   | 5.772          | 9.053          | 2.421e-10      | 0.06319   | 0.001901  | 0.1030     |
|     |      | 0.3960      | 0.4725      | 0.1315      | 2.811          | 3.355          | 0.9335         | 0.1235    | 0.0004475 | 0.01620    |
| 4   | PH   | 0.5085      | 0.4912      | 0.0003293   | 609.2          | 588.5          | 0.3945         | 0.0008340 | 0.9574    | 0.8001     |
|     |      | 0.6858      | 0.3127      | 0.001444    | 44.35          | 20.22          | 0.09336        | 0.01523   | 0.03712   | 0.1297     |
|     |      | 0.2865      | 0.7114      | 0.002068    | 17.02          | 42.27          | 0.1229         | 0.01655   | 0.003173  | 0.06281    |
|     |      | 0.4244      | 0.3879      | 0.1877      | 5.248          | 4.797          | 2.320          | 0.07482   | 0.002325  | 0.007351   |
| 5   | TH   | 0.5087      | 0.4910      | 0.0003365   | 1559.          | 1505.          | 1.032          | 0.0003261 | 0.9400    | 0.6069     |
|     |      | 0.4921      | 0.5079      | 2.566e-12   | 68.05          | 70.24          | 3.549e-10      | 0.007179  | 0.05255   | 0.2596     |
|     |      | 0.6681      | 0.3309      | 0.0009906   | 68.83          | 34.09          | 0.1021         | 0.009613  | 0.006758  | 0.1184     |
|     |      | 0.1830      | 0.8124      | 0.004587    | 40.72          | 180.8          | 1.021          | 0.004474  | 0.0003607 | 0.006791   |
|     |      | 0.4126      | 0.4176      | 0.1698      | 4.200          | 4.252          | 1.729          | 0.08944   | 0.0003365 | 0.008318   |
| 5   | PH   | 0.5091      | 0.4905      | 0.0003334   | 541.1          | 521.3          | 0.3543         | 0.0009401 | 0.9621    | 0.7844     |
|     |      | 0.7066      | 0.2925      | 0.0008654   | 84.52          | 34.99          | 0.1035         | 0.008291  | 0.03006   | 0.1041     |
|     |      | 0.3418      | 0.6559      | 0.002284    | 8.945          | 17.17          | 0.05979        | 0.03680   | 0.004931  | 0.09977    |
|     |      | 0.3909      | 0.3910      | 0.2181      | 5.315          | 5.316          | 2.965          | 0.06851   | 0.001827  | 0.002392   |
|     |      | 0.6357      | 0.3101      | 0.05419     | 116.5          | 56.86          | 9.935          | 0.005425  | 0.001124  | 0.009365   |
| 6   | TH   | 0.5080      | 0.4917      | 0.0003223   | 951.4          | 921.0          | 0.6037         | 0.0005336 | 0.9882    | 0.7899     |
|     |      | 0.4888      | 0.5112      | 1.144e-12   | 6.890          | 7.206          | 1.613e-11      | 0.06624   | 0.005814  | 0.09112    |
|     |      | 0.6712      | 0.3277      | 0.001044    | 91.30          | 44.58          | 0.1420         | 0.007298  | 0.005624  | 0.1148     |
|     |      | 0.3776      | 0.3389      | 0.2835      | 9.272          | 8.323          | 6.963          | 0.03913   | 0.0001271 | 0.0001636  |
|     |      | 0.5800      | 0.3208      | 0.09922     | Inf            | Inf            | Inf            | 0.000     | 0.0001266 | 0.003055   |
|     |      | 0.1469      | 0.7648      | 0.08838     | Inf            | Inf            | Inf            | 0.000     | 0.0001105 | 0.0008727  |
| 6   | PH   | 0.5075      | 0.4921      | 0.0003551   | 1391.          | 1349.          | 0.9731         | 0.0003647 | 0.8904    | 0.7078     |
|     |      | 0.5468      | 0.4532      | 3.921e-12   | 29.56          | 24.50          | 2.120e-10      | 0.01816   | 0.08800   | 0.1954     |
|     |      | 0.7474      | 0.2518      | 0.0007493   | Inf            | Inf            | Inf            | 0.000     | 0.01564   | 0.04625    |
|     |      | 0.2536      | 0.7436      | 0.002730    | 25.62          | 75.13          | 0.2758         | 0.009801  | 0.002149  | 0.03658    |
|     |      | 0.3995      | 0.3916      | 0.2090      | 5.318          | 5.213          | 2.782          | 0.06986   | 0.001971  | 0.002820   |
|     |      | 0.6428      | 0.3201      | 0.03712     | 137.9          | 68.66          | 7.961          | 0.004641  | 0.001824  | 0.01120    |

Table S9: Maximum likelihood parameter estimates for several heterozygous models on CEU12 Chr21.

| $k$ | Data | $\pi_{ref}$ | $\pi_{alt}$ | $\pi_{err}$ | $\alpha_{ref}$ | $\alpha_{alt}$ | $\alpha_{err}$ | $\varphi$ | $\rho$    | ML- $\rho$ |
|-----|------|-------------|-------------|-------------|----------------|----------------|----------------|-----------|-----------|------------|
| M   | TH   | 0.4998      | 0.4998      | 0.0004307   | Inf            | Inf            | Inf            | 0.000     | 1.000     | 1.000      |
| BM  | TH   | 0.5100      | 0.4895      | 0.0004307   | Inf            | Inf            | Inf            | 0.000     | 1.000     | 1.000      |
| 1   | TH   | 0.5101      | 0.4895      | 0.0003713   | 124.5          | 119.4          | 0.09058        | 0.004082  | 1.000     | 1.000      |
| 1   | PH   | 0.5227      | 0.4765      | 0.0007124   | 21.89          | 19.95          | 0.02983        | 0.02332   | 1.000     | 1.000      |
| 2   | TH   | 0.5089      | 0.4908      | 0.0003148   | 3945.          | 3805.          | 2.441          | 0.0001290 | 0.9610    | 0.8400     |
|     |      | 0.5414      | 0.4566      | 0.002043    | 6.465          | 5.452          | 0.02440        | 0.07727   | 0.03896   | 0.1600     |
| 2   | PH   | 0.5086      | 0.4911      | 0.0003195   | Inf            | Inf            | Inf            | 0.000     | 0.7717    | 0.7700     |
|     |      | 0.5657      | 0.4320      | 0.002319    | 6.665          | 5.089          | 0.02733        | 0.07823   | 0.2283    | 0.2300     |
| 3   | TH   | 0.5087      | 0.4909      | 0.0003219   | 4138.          | 3993.          | 2.619          | 0.0001229 | 0.9579    | 0.8340     |
|     |      | 0.5439      | 0.4551      | 0.001005    | 7.315          | 6.121          | 0.01352        | 0.06921   | 0.04168   | 0.1634     |
|     |      | 0.2944      | 0.4984      | 0.2072      | 9.508          | 16.10          | 6.690          | 0.03003   | 0.0003916 | 0.002581   |
| 3   | PH   | 0.5088      | 0.4909      | 0.0003109   | 4069.          | 3925.          | 2.487          | 0.0001250 | 0.8314    | 0.7583     |
|     |      | 0.5065      | 0.4896      | 0.003937    | 4.904          | 4.740          | 0.03811        | 0.09362   | 0.09951   | 0.08736    |
|     |      | 0.7025      | 0.2964      | 0.001033    | 45.61          | 19.24          | 0.06707        | 0.01517   | 0.06907   | 0.1543     |
| 4   | TH   | 0.5085      | 0.4912      | 0.0003246   | 915.7          | 884.6          | 0.5845         | 0.0005550 | 0.9832    | 0.8537     |
|     |      | 0.6889      | 0.3106      | 0.0005154   | 38.32          | 17.28          | 0.02867        | 0.01766   | 0.01348   | 0.1045     |
|     |      | 0.2569      | 0.7431      | 2.615e-14   | 60.48          | 175.0          | 6.157e-12      | 0.004230  | 0.002605  | 0.03412    |
|     |      | 0.3490      | 0.4979      | 0.1531      | 6.533          | 9.320          | 2.866          | 0.05071   | 0.0006668 | 0.007676   |
| 4   | PH   | 0.5091      | 0.4905      | 0.0003243   | 1.323e+05      | 1.275e+05      | 84.29          | 3.847e-06 | 0.8261    | 0.7245     |
|     |      | 0.6979      | 0.3008      | 0.001225    | 37.28          | 16.07          | 0.06546        | 0.01838   | 0.08869   | 0.1578     |
|     |      | 0.4630      | 0.5354      | 0.001599    | 6.967          | 8.057          | 0.02407        | 0.06231   | 0.08300   | 0.1099     |
|     |      | 0.4091      | 0.3630      | 0.2279      | 3.882          | 3.444          | 2.162          | 0.09535   | 0.002219  | 0.007761   |
| 5   | TH   | 0.5063      | 0.4934      | 0.0002986   | Inf            | Inf            | Inf            | 0.000     | 0.8876    | 0.6159     |
|     |      | 0.5347      | 0.4647      | 0.0006122   | 104.1          | 90.46          | 0.1192         | 0.005110  | 0.1000    | 0.2778     |
|     |      | 0.7276      | 0.2722      | 0.0001842   | 88.49          | 33.11          | 0.02240        | 0.008155  | 0.008405  | 0.04642    |
|     |      | 0.2826      | 0.7174      | 3.058e-13   | 21.66          | 54.99          | 2.344e-11      | 0.01288   | 0.003326  | 0.05430    |
|     |      | 0.3345      | 0.4998      | 0.1657      | 6.946          | 10.38          | 3.441          | 0.04595   | 0.0006072 | 0.005531   |
| 5   | PH   | 0.5075      | 0.4922      | 0.0003128   | Inf            | Inf            | Inf            | 0.000     | 0.8300    | 0.6505     |
|     |      | 0.6431      | 0.3557      | 0.001168    | 40.31          | 22.30          | 0.07320        | 0.01570   | 0.09971   | 0.1686     |
|     |      | 0.3808      | 0.6179      | 0.001275    | 9.917          | 16.09          | 0.03319        | 0.03698   | 0.04325   | 0.1250     |
|     |      | 0.7783      | 0.2213      | 0.0004573   | Inf            | Inf            | Inf            | 0.000     | 0.02400   | 0.04580    |
|     |      | 0.4393      | 0.3751      | 0.1856      | 3.878          | 3.312          | 1.638          | 0.1018    | 0.003021  | 0.01015    |
| 6   | TH   | 0.5064      | 0.4933      | 0.0003001   | Inf            | Inf            | Inf            | 0.000     | 0.9329    | 0.6286     |
|     |      | 0.5748      | 0.4247      | 0.0005298   | Inf            | Inf            | Inf            | 0.000     | 0.03201   | 0.2906     |
|     |      | 0.5367      | 0.4620      | 0.001361    | 30.46          | 26.22          | 0.07723        | 0.01732   | 0.02589   | 0.02330    |
|     |      | 0.7486      | 0.2514      | 6.357e-12   | 239.3          | 80.36          | 2.032e-09      | 0.003119  | 0.006196  | 0.02450    |
|     |      | 0.2540      | 0.7460      | 1.612e-14   | 80.61          | 236.8          | 5.117e-12      | 0.003141  | 0.002496  | 0.02960    |
|     |      | 0.3235      | 0.5008      | 0.1757      | 7.404          | 11.46          | 4.021          | 0.04186   | 0.0005525 | 0.003352   |
| 6   | PH   | 0.5071      | 0.4926      | 0.0003104   | Inf            | Inf            | Inf            | 0.000     | 0.8476    | 0.6526     |
|     |      | 0.6440      | 0.3550      | 0.0009901   | 59.22          | 32.65          | 0.09105        | 0.01076   | 0.09219   | 0.1690     |
|     |      | 0.7764      | 0.2231      | 0.0004401   | Inf            | Inf            | Inf            | 0.000     | 0.02775   | 0.04552    |
|     |      | 0.3482      | 0.6512      | 0.0006171   | Inf            | Inf            | Inf            | 0.000     | 0.02232   | 0.1050     |
|     |      | 0.2199      | 0.7800      | 0.0001242   | 288.9          | 1025.          | 0.1631         | 0.0007606 | 0.005651  | 0.01012    |
|     |      | 0.4610      | 0.4047      | 0.1343      | 3.629          | 3.186          | 1.058          | 0.1127    | 0.004472  | 0.01765    |

Table S10: **Maximum likelihood parameter estimates for several heterozygous models on CEU11 Chr10.**

| $k$ | Data | $\pi_{ref}$ | $\pi_{alt}$ | $\pi_{err}$ | $\alpha_{ref}$ | $\alpha_{alt}$ | $\alpha_{err}$ | $\varphi$ | $\rho$    | ML- $\rho$ |
|-----|------|-------------|-------------|-------------|----------------|----------------|----------------|-----------|-----------|------------|
| M   | TH   | 0.4998      | 0.4998      | 0.0003806   | Inf            | Inf            | Inf            | 0.000     | 1.000     | 1.000      |
| BM  | TH   | 0.5087      | 0.4909      | 0.0003806   | Inf            | Inf            | Inf            | 0.000     | 1.000     | 1.000      |
| 1   | TH   | 0.5087      | 0.4909      | 0.0003467   | 237.1          | 228.8          | 0.1616         | 0.002141  | 1.000     | 1.000      |
| 1   | PH   | 0.5140      | 0.4855      | 0.0004811   | 64.41          | 60.83          | 0.06028        | 0.007917  | 1.000     | 1.000      |
| 2   | TH   | 0.5082      | 0.4914      | 0.0003192   | 913.1          | 882.9          | 0.5735         | 0.0005563 | 0.9861    | 0.8484     |
|     |      | 0.5418      | 0.4552      | 0.003015    | 6.806          | 5.718          | 0.03787        | 0.07373   | 0.01390   | 0.1516     |
| 2   | PH   | 0.5090      | 0.4907      | 0.0003069   | 2376.          | 2290.          | 1.432          | 0.0002142 | 0.9185    | 0.8213     |
|     |      | 0.5717      | 0.4247      | 0.003620    | 7.638          | 5.674          | 0.04837        | 0.06964   | 0.08153   | 0.1787     |
| 3   | TH   | 0.5078      | 0.4919      | 0.0003205   | 836.8          | 810.5          | 0.5281         | 0.0006065 | 0.9916    | 0.8235     |
|     |      | 0.6694      | 0.3299      | 0.0006524   | 95.27          | 46.95          | 0.09285        | 0.006978  | 0.006423  | 0.1164     |
|     |      | 0.4460      | 0.5307      | 0.02328     | 2.716          | 3.232          | 0.1418         | 0.1411    | 0.001937  | 0.06010    |
| 3   | PH   | 0.5080      | 0.4916      | 0.0003201   | Inf            | Inf            | Inf            | 0.000     | 0.9013    | 0.8013     |
|     |      | 0.5724      | 0.4259      | 0.001645    | 10.61          | 7.893          | 0.03048        | 0.05120   | 0.09706   | 0.1914     |
|     |      | 0.3875      | 0.3908      | 0.2217      | 4.649          | 4.689          | 2.660          | 0.07694   | 0.001670  | 0.007224   |
| 4   | TH   | 0.5078      | 0.4918      | 0.0003216   | 890.2          | 862.2          | 0.5638         | 0.0005701 | 0.9906    | 0.7565     |
|     |      | 0.6659      | 0.3333      | 0.0008860   | 73.44          | 36.76          | 0.09773        | 0.008985  | 0.007101  | 0.1211     |
|     |      | 0.3972      | 0.6028      | 1.012e-11   | 6.084          | 9.233          | 1.550e-10      | 0.06129   | 0.001883  | 0.1062     |
|     |      | 0.3964      | 0.4717      | 0.1319      | 2.819          | 3.354          | 0.9377         | 0.1233    | 0.0004465 | 0.01614    |
| 4   | PH   | 0.5085      | 0.4912      | 0.0003312   | 595.2          | 574.9          | 0.3877         | 0.0008536 | 0.9583    | 0.8022     |
|     |      | 0.6870      | 0.3116      | 0.001413    | 48.01          | 21.77          | 0.09876        | 0.01411   | 0.03632   | 0.1272     |
|     |      | 0.2877      | 0.7103      | 0.002073    | 17.19          | 42.46          | 0.1239         | 0.01645   | 0.003089  | 0.06303    |
|     |      | 0.4269      | 0.3869      | 0.1863      | 5.220          | 4.731          | 2.278          | 0.07559   | 0.002330  | 0.007552   |
| 5   | TH   | 0.5079      | 0.4918      | 0.0003222   | 881.7          | 853.8          | 0.5593         | 0.0005757 | 0.9905    | 0.7699     |
|     |      | 0.6665      | 0.3325      | 0.0009937   | 73.55          | 36.69          | 0.1096         | 0.008981  | 0.006994  | 0.1221     |
|     |      | 0.4137      | 0.5863      | 2.726e-12   | 5.833          | 8.267          | 3.844e-11      | 0.06623   | 0.002182  | 0.1052     |
|     |      | 0.4482      | 0.3445      | 0.2073      | 8.755          | 6.730          | 4.050          | 0.04870   | 0.0002355 | 0.002318   |
|     |      | 0.1457      | 0.7649      | 0.08935     | Inf            | Inf            | Inf            | 0.000     | 0.0001064 | 0.0004363  |
| 5   | PH   | 0.5091      | 0.4906      | 0.0003365   | 479.5          | 462.0          | 0.3169         | 0.001061  | 0.9655    | 0.8305     |
|     |      | 0.7097      | 0.2894      | 0.0008222   | 106.1          | 43.25          | 0.1229         | 0.006647  | 0.02867   | 0.1001     |
|     |      | 0.2792      | 0.7184      | 0.002348    | 18.46          | 47.48          | 0.1552         | 0.01490   | 0.002841  | 0.05631    |
|     |      | 0.3941      | 0.3894      | 0.2165      | 5.305          | 5.241          | 2.914          | 0.06916   | 0.001844  | 0.002542   |
|     |      | 0.6348      | 0.3135      | 0.05165     | 97.86          | 48.33          | 7.962          | 0.006445  | 0.001169  | 0.01052    |
| 6   | TH   | 0.5078      | 0.4919      | 0.0003366   | 1398.          | 1354.          | 0.9266         | 0.0003631 | 0.9443    | 0.6906     |
|     |      | 0.5134      | 0.4866      | 2.236e-06   | 56.66          | 53.70          | 0.0002467      | 0.008980  | 0.04954   | 0.1439     |
|     |      | 0.6840      | 0.3148      | 0.001235    | 92.72          | 42.67          | 0.1674         | 0.007323  | 0.005006  | 0.08627    |
|     |      | 0.3182      | 0.6818      | 5.043e-12   | 6.405          | 13.72          | 1.015e-10      | 0.04733   | 0.0008296 | 0.07632    |
|     |      | 0.4515      | 0.3463      | 0.2022      | 8.736          | 6.700          | 3.913          | 0.04914   | 0.0002474 | 0.002509   |
|     |      | 0.1463      | 0.7645      | 0.08922     | Inf            | Inf            | Inf            | 0.000     | 0.0001074 | 0.0003272  |
| 6   | PH   | 0.5080      | 0.4917      | 0.0003474   | 890.7          | 862.1          | 0.6091         | 0.0005700 | 0.9219    | 0.7400     |
|     |      | 0.5671      | 0.4329      | 2.620e-12   | 20.45          | 15.61          | 9.448e-11      | 0.02698   | 0.05887   | 0.1642     |
|     |      | 0.7458      | 0.2533      | 0.0009029   | Inf            | Inf            | Inf            | 0.000     | 0.01342   | 0.04161    |
|     |      | 0.2569      | 0.7404      | 0.002781    | 23.97          | 69.08          | 0.2595         | 0.01060   | 0.002113  | 0.04020    |
|     |      | 0.4028      | 0.3886      | 0.2086      | 5.332          | 5.145          | 2.761          | 0.07023   | 0.001971  | 0.002895   |
|     |      | 0.6434      | 0.3197      | 0.03681     | 152.8          | 75.93          | 8.742          | 0.004193  | 0.001701  | 0.01110    |

Table S11: Maximum likelihood parameter estimates for several heterozygous models on CEU11 Chr21.

| $k$ | Data | $\pi_{ref}$ | $\pi_{alt}$ | $\pi_{err}$ | $\alpha_{ref}$ | $\alpha_{alt}$ | $\alpha_{err}$ | $\varphi$ | $\rho$    | ML- $\rho$ |
|-----|------|-------------|-------------|-------------|----------------|----------------|----------------|-----------|-----------|------------|
| M   | TH   | 0.4998      | 0.4998      | 0.0004293   | Inf            | Inf            | Inf            | 0.000     | 1.000     | 1.000      |
| BM  | TH   | 0.5100      | 0.4896      | 0.0004293   | Inf            | Inf            | Inf            | 0.000     | 1.000     | 1.000      |
| 1   | TH   | 0.5101      | 0.4895      | 0.0003703   | 124.1          | 119.1          | 0.09006        | 0.004095  | 1.000     | 1.000      |
| 1   | PH   | 0.5224      | 0.4769      | 0.0007034   | 22.27          | 20.33          | 0.02998        | 0.02292   | 1.000     | 1.000      |
| 2   | TH   | 0.5088      | 0.4908      | 0.0003149   | 3879.          | 3742.          | 2.400          | 0.0001312 | 0.9609    | 0.8418     |
|     |      | 0.5406      | 0.4574      | 0.001981    | 6.374          | 5.394          | 0.02336        | 0.07818   | 0.03908   | 0.1582     |
| 2   | PH   | 0.5086      | 0.4911      | 0.0003191   | Inf            | Inf            | Inf            | 0.000     | 0.7727    | 0.7701     |
|     |      | 0.5645      | 0.4332      | 0.002278    | 6.717          | 5.155          | 0.02711        | 0.07752   | 0.2273    | 0.2299     |
| 3   | TH   | 0.5087      | 0.4910      | 0.0003224   | 3838.          | 3704.          | 2.432          | 0.0001325 | 0.9580    | 0.8328     |
|     |      | 0.5432      | 0.4558      | 0.0009155   | 7.184          | 6.028          | 0.01211        | 0.07030   | 0.04157   | 0.1643     |
|     |      | 0.2996      | 0.4973      | 0.2031      | 9.022          | 14.97          | 6.117          | 0.03214   | 0.0004082 | 0.002882   |
| 3   | PH   | 0.5088      | 0.4909      | 0.0003093   | 1.019e+04      | 9832.          | 6.194          | 4.993e-05 | 0.8303    | 0.7578     |
|     |      | 0.5068      | 0.4894      | 0.003809    | 4.996          | 4.824          | 0.03755        | 0.09210   | 0.1015    | 0.08709    |
|     |      | 0.7005      | 0.2985      | 0.001015    | 45.51          | 19.39          | 0.06594        | 0.01516   | 0.06817   | 0.1551     |
| 4   | TH   | 0.5085      | 0.4911      | 0.0003254   | 815.4          | 787.4          | 0.5217         | 0.0006233 | 0.9850    | 0.8723     |
|     |      | 0.7020      | 0.2977      | 0.0002903   | 49.82          | 21.12          | 0.02060        | 0.01390   | 0.01189   | 0.09219    |
|     |      | 0.2447      | 0.7553      | 1.372e-14   | 329.7          | 1017.          | 1.848e-11      | 0.0007418 | 0.002408  | 0.02651    |
|     |      | 0.3573      | 0.4937      | 0.1490      | 6.297          | 8.702          | 2.627          | 0.05369   | 0.0006942 | 0.009014   |
| 4   | PH   | 0.5091      | 0.4906      | 0.0003222   | 9.835e+05      | 9.478e+05      | 622.5          | 5.176e-07 | 0.8297    | 0.7159     |
|     |      | 0.6937      | 0.3051      | 0.001199    | 36.06          | 15.86          | 0.06233        | 0.01888   | 0.09284   | 0.1598     |
|     |      | 0.4490      | 0.5495      | 0.001536    | 7.374          | 9.025          | 0.02522        | 0.05739   | 0.07515   | 0.1163     |
|     |      | 0.4164      | 0.3636      | 0.2200      | 3.943          | 3.443          | 2.083          | 0.09553   | 0.002298  | 0.008000   |
| 5   | TH   | 0.5073      | 0.4924      | 0.0003050   | 2099.          | 2037.          | 1.262          | 0.0002417 | 0.9539    | 0.6800     |
|     |      | 0.5590      | 0.4400      | 0.001056    | 74.72          | 58.81          | 0.1412         | 0.007426  | 0.03453   | 0.2438     |
|     |      | 0.7272      | 0.2728      | 4.369e-13   | 85.58          | 32.10          | 5.141e-11      | 0.008426  | 0.008178  | 0.03525    |
|     |      | 0.2594      | 0.7406      | 3.191e-14   | 48.48          | 138.4          | 5.964e-12      | 0.005323  | 0.002802  | 0.03629    |
|     |      | 0.3323      | 0.5008      | 0.1668      | 7.093          | 10.69          | 3.561          | 0.04475   | 0.0006004 | 0.004625   |
| 5   | PH   | 0.5074      | 0.4923      | 0.0003110   | Inf            | Inf            | Inf            | 0.000     | 0.8311    | 0.6477     |
|     |      | 0.6406      | 0.3583      | 0.001125    | 44.32          | 24.79          | 0.07786        | 0.01425   | 0.09793   | 0.1700     |
|     |      | 0.3789      | 0.6198      | 0.001252    | 10.26          | 16.78          | 0.03389        | 0.03563   | 0.04278   | 0.1251     |
|     |      | 0.7761      | 0.2235      | 0.0004227   | Inf            | Inf            | Inf            | 0.000     | 0.02510   | 0.04629    |
|     |      | 0.4464      | 0.3747      | 0.1789      | 3.921          | 3.291          | 1.572          | 0.1022    | 0.003104  | 0.01093    |
| 6   | TH   | 0.5051      | 0.4946      | 0.0002970   | Inf            | Inf            | Inf            | 0.000     | 0.9154    | 0.5886     |
|     |      | 0.5615      | 0.4381      | 0.0004165   | Inf            | Inf            | Inf            | 0.000     | 0.06798   | 0.3180     |
|     |      | 0.7339      | 0.2661      | 1.338e-12   | 123.9          | 44.94          | 2.260e-10      | 0.005887  | 0.007956  | 0.03247    |
|     |      | 0.5223      | 0.4719      | 0.005832    | 28.27          | 25.54          | 0.3157         | 0.01814   | 0.005586  | 0.03264    |
|     |      | 0.2500      | 0.7500      | 1.991e-14   | 87.40          | 262.2          | 6.961e-12      | 0.002852  | 0.002559  | 0.02724    |
|     |      | 0.3210      | 0.4976      | 0.1814      | 7.584          | 11.76          | 4.286          | 0.04061   | 0.0005290 | 0.001072   |
| 6   | PH   | 0.5071      | 0.4926      | 0.0003088   | Inf            | Inf            | Inf            | 0.000     | 0.8500    | 0.6483     |
|     |      | 0.6432      | 0.3559      | 0.0009473   | 70.76          | 39.15          | 0.1042         | 0.009008  | 0.08860   | 0.1723     |
|     |      | 0.7740      | 0.2256      | 0.0004075   | Inf            | Inf            | Inf            | 0.000     | 0.02881   | 0.04595    |
|     |      | 0.3480      | 0.6514      | 0.0006124   | Inf            | Inf            | Inf            | 0.000     | 0.02247   | 0.1050     |
|     |      | 0.2201      | 0.7798      | 0.0001335   | 2486.          | 8810.          | 1.508          | 8.851e-05 | 0.005572  | 0.01011    |
|     |      | 0.4663      | 0.4038      | 0.1299      | 3.694          | 3.199          | 1.029          | 0.1121    | 0.004579  | 0.01831    |

Table S12: Maximum likelihood parameter estimates for several heterozygous models on CEU10 Chr10.

| $k$ | Data | $\pi_{ref}$ | $\pi_{alt}$ | $\pi_{err}$ | $\alpha_{ref}$ | $\alpha_{alt}$ | $\alpha_{err}$ | $\varphi$ | $\rho$    | ML- $\rho$ |
|-----|------|-------------|-------------|-------------|----------------|----------------|----------------|-----------|-----------|------------|
| M   | TH   | 0.4989      | 0.4989      | 0.002286    | Inf            | Inf            | Inf            | 0.000     | 1.000     | 1.000      |
| BM  | TH   | 0.5392      | 0.4585      | 0.002286    | Inf            | Inf            | Inf            | 0.000     | 1.000     | 1.000      |
| 1   | TH   | 0.5393      | 0.4583      | 0.002339    | 153.8          | 130.7          | 0.6670         | 0.003494  | 1.000     | 1.000      |
| 1   | PH   | 0.5427      | 0.4547      | 0.002618    | 59.24          | 49.63          | 0.2858         | 0.009078  | 1.000     | 1.000      |
| 2   | TH   | 0.5344      | 0.4626      | 0.003046    | Inf            | Inf            | Inf            | 0.000     | 0.6843    | 0.6056     |
|     |      | 0.5502      | 0.4491      | 0.0006450   | 42.20          | 34.45          | 0.04947        | 0.01287   | 0.3157    | 0.3944     |
| 2   | PH   | 0.5369      | 0.4607      | 0.002451    | Inf            | Inf            | Inf            | 0.000     | 0.7865    | 0.7211     |
|     |      | 0.5630      | 0.4343      | 0.002709    | 15.41          | 11.88          | 0.07414        | 0.03525   | 0.2135    | 0.2789     |
| 3   | TH   | 0.5292      | 0.4684      | 0.002365    | 459.3          | 406.5          | 2.053          | 0.001151  | 0.8825    | 0.5417     |
|     |      | 0.6175      | 0.3809      | 0.001567    | Inf            | Inf            | Inf            | 0.000     | 0.1161    | 0.3581     |
|     |      | 0.4946      | 0.4907      | 0.01469     | 5.697          | 5.652          | 0.1693         | 0.07988   | 0.001398  | 0.1002     |
| 3   | PH   | 0.5322      | 0.4655      | 0.002265    | 1102.          | 963.9          | 4.690          | 0.0004827 | 0.8803    | 0.5988     |
|     |      | 0.6597      | 0.3382      | 0.002081    | 201.5          | 103.3          | 0.6358         | 0.003263  | 0.08773   | 0.2923     |
|     |      | 0.5082      | 0.4820      | 0.009872    | 7.470          | 7.085          | 0.1451         | 0.06370   | 0.03201   | 0.1089     |
| 4   | TH   | 0.5385      | 0.4584      | 0.003147    | 5764.          | 4907.          | 33.69          | 9.342e-05 | 0.7036    | 0.1746     |
|     |      | 0.4978      | 0.5020      | 0.0001580   | Inf            | Inf            | Inf            | 0.000     | 0.1894    | 0.4267     |
|     |      | 0.6214      | 0.3785      | 0.0001465   | Inf            | Inf            | Inf            | 0.000     | 0.1052    | 0.3446     |
|     |      | 0.5062      | 0.4765      | 0.01732     | 6.740          | 6.344          | 0.2306         | 0.06986   | 0.001808  | 0.05410    |
| 4   | PH   | 0.5318      | 0.4659      | 0.002284    | 1310.          | 1148.          | 5.624          | 0.0004058 | 0.8706    | 0.5051     |
|     |      | 0.6471      | 0.3504      | 0.002439    | 93.50          | 50.63          | 0.3524         | 0.006874  | 0.1122    | 0.2902     |
|     |      | 0.3980      | 0.5974      | 0.004538    | 19.62          | 29.45          | 0.2237         | 0.01988   | 0.01576   | 0.1730     |
|     |      | 0.4907      | 0.3654      | 0.1439      | 8.623          | 6.422          | 2.529          | 0.05384   | 0.001389  | 0.03162    |
| 5   | TH   | 0.5375      | 0.4598      | 0.002703    | 931.7          | 796.8          | 4.684          | 0.0005766 | 0.8379    | 0.2351     |
|     |      | 0.4809      | 0.5191      | 9.648e-09   | Inf            | Inf            | Inf            | 0.000     | 0.08877   | 0.3769     |
|     |      | 0.6328      | 0.3672      | 7.373e-06   | Inf            | Inf            | Inf            | 0.000     | 0.07241   | 0.2959     |
|     |      | 0.4405      | 0.5310      | 0.02848     | 4.246          | 5.118          | 0.2745         | 0.09400   | 0.0005682 | 0.03864    |
|     |      | 0.7129      | 0.2672      | 0.01997     | Inf            | Inf            | Inf            | 0.000     | 0.0003595 | 0.05356    |
| 5   | PH   | 0.5327      | 0.4651      | 0.002286    | 961.7          | 839.7          | 4.128          | 0.0005535 | 0.8884    | 0.5139     |
|     |      | 0.6583      | 0.3395      | 0.002246    | 133.2          | 68.72          | 0.4545         | 0.004916  | 0.09538   | 0.2683     |
|     |      | 0.3891      | 0.6064      | 0.004445    | 20.92          | 32.61          | 0.2390         | 0.01826   | 0.01421   | 0.1653     |
|     |      | 0.5293      | 0.3740      | 0.09664     | 13.01          | 9.195          | 2.376          | 0.03909   | 0.001865  | 0.05228    |
|     |      | 0.3129      | 0.2815      | 0.4057      | Inf            | Inf            | Inf            | 0.000     | 0.0001235 | 0.0002183  |
| 6   | TH   | 0.5368      | 0.4605      | 0.002664    | 957.1          | 821.2          | 4.750          | 0.0005605 | 0.8447    | 0.2414     |
|     |      | 0.6303      | 0.3695      | 0.0001818   | Inf            | Inf            | Inf            | 0.000     | 0.07763   | 0.2969     |
|     |      | 0.4762      | 0.5238      | 2.103e-11   | 4.396e+18      | 4.836e+18      | 1.941e+08      | 1.083e-19 | 0.06451   | 0.1542     |
|     |      | 0.4755      | 0.5245      | 6.601e-11   | 4.456e+18      | 4.915e+18      | 6.186e+08      | 1.067e-19 | 0.01230   | 0.2149     |
|     |      | 0.4409      | 0.5291      | 0.02999     | 4.223          | 5.067          | 0.2872         | 0.09455   | 0.0005470 | 0.03660    |
|     |      | 0.7119      | 0.2675      | 0.02055     | Inf            | Inf            | Inf            | 0.000     | 0.0003607 | 0.05591    |
|     |      | 0.5387      | 0.4587      | 0.002593    | 6828.          | 5813.          | 32.87          | 7.890e-05 | 0.7685    | 0.2700     |
| 6   | PH   | 0.5007      | 0.4987      | 0.0006118   | 289.3          | 288.1          | 0.3535         | 0.001728  | 0.1378    | 0.3219     |
|     |      | 0.6670      | 0.3312      | 0.001808    | 183.5          | 91.12          | 0.4975         | 0.003621  | 0.08252   | 0.2569     |
|     |      | 0.3504      | 0.6443      | 0.005303    | 28.03          | 51.53          | 0.4241         | 0.01235   | 0.007775  | 0.08963    |
|     |      | 0.5371      | 0.3959      | 0.06700     | 11.64          | 8.577          | 1.451          | 0.04412   | 0.003235  | 0.06133    |
|     |      | 0.3180      | 0.2837      | 0.3982      | Inf            | Inf            | Inf            | 0.000     | 0.0001356 | 0.0002456  |



Table S13: Maximum likelihood parameter estimates for several heterozygous models on CEU10 Chr21.

| $k$ | Data | $\pi_{ref}$ | $\pi_{alt}$ | $\pi_{err}$ | $\alpha_{ref}$ | $\alpha_{alt}$ | $\alpha_{err}$ | $\varphi$ | $\rho$    | ML- $\rho$ |
|-----|------|-------------|-------------|-------------|----------------|----------------|----------------|-----------|-----------|------------|
| M   | TH   | 0.4989      | 0.4989      | 0.002279    | Inf            | Inf            | Inf            | 0.000     | 1.000     | 1.000      |
| BM  | TH   | 0.5428      | 0.4549      | 0.002279    | Inf            | Inf            | Inf            | 0.000     | 1.000     | 1.000      |
| 1   | TH   | 0.5432      | 0.4545      | 0.002379    | 101.1          | 84.56          | 0.4426         | 0.005346  | 1.000     | 1.000      |
| 1   | PH   | 0.5530      | 0.4438      | 0.003217    | 23.50          | 18.86          | 0.1367         | 0.02299   | 1.000     | 1.000      |
| 2   | TH   | 0.5326      | 0.4651      | 0.002245    | 350.1          | 305.8          | 1.476          | 0.001519  | 0.9217    | 0.7184     |
|     |      | 0.6700      | 0.3273      | 0.002700    | Inf            | Inf            | Inf            | 0.000     | 0.07827   | 0.2816     |
| 2   | PH   | 0.5355      | 0.4621      | 0.002403    | Inf            | Inf            | Inf            | 0.000     | 0.6629    | 0.7140     |
|     |      | 0.5841      | 0.4118      | 0.004152    | 10.77          | 7.594          | 0.07657        | 0.05143   | 0.3371    | 0.2860     |
| 3   | TH   | 0.5309      | 0.4669      | 0.002163    | 1097.          | 964.3          | 4.468          | 0.0004839 | 0.8918    | 0.5612     |
|     |      | 0.6619      | 0.3355      | 0.002684    | Inf            | Inf            | Inf            | 0.000     | 0.09611   | 0.2997     |
|     |      | 0.5166      | 0.4755      | 0.007905    | 16.27          | 14.98          | 0.2490         | 0.03077   | 0.01204   | 0.1391     |
| 3   | PH   | 0.5324      | 0.4654      | 0.002176    | 883.6          | 772.5          | 3.611          | 0.0006022 | 0.7969    | 0.6416     |
|     |      | 0.6947      | 0.3020      | 0.003294    | 87.15          | 37.88          | 0.4132         | 0.007909  | 0.1322    | 0.2628     |
|     |      | 0.5123      | 0.4793      | 0.008307    | 5.767          | 5.396          | 0.09350        | 0.08159   | 0.07087   | 0.09553    |
| 4   | TH   | 0.5338      | 0.4641      | 0.002115    | Inf            | Inf            | Inf            | 0.000     | 0.7544    | 0.3976     |
|     |      | 0.5168      | 0.4806      | 0.002595    | 122.4          | 113.8          | 0.6147         | 0.004204  | 0.1511    | 0.2720     |
|     |      | 0.6637      | 0.3335      | 0.002733    | Inf            | Inf            | Inf            | 0.000     | 0.09385   | 0.2679     |
|     |      | 0.4814      | 0.4603      | 0.05827     | 16.71          | 15.98          | 2.023          | 0.02799   | 0.0006847 | 0.06242    |
| 4   | PH   | 0.5324      | 0.4654      | 0.002212    | 392.4          | 343.0          | 1.631          | 0.001355  | 0.8320    | 0.5835     |
|     |      | 0.6956      | 0.3012      | 0.003238    | 77.50          | 33.56          | 0.3608         | 0.008895  | 0.1449    | 0.2472     |
|     |      | 0.3431      | 0.6527      | 0.004234    | 13.41          | 25.51          | 0.1655         | 0.02495   | 0.01933   | 0.1220     |
|     |      | 0.5398      | 0.3514      | 0.1088      | 7.280          | 4.738          | 1.468          | 0.06904   | 0.003795  | 0.04725    |
| 5   | TH   | 0.5339      | 0.4641      | 0.002004    | 3.516e+04      | 3.056e+04      | 132.0          | 1.519e-05 | 0.7817    | 0.2977     |
|     |      | 0.5001      | 0.4969      | 0.002946    | 206.0          | 204.7          | 1.214          | 0.002422  | 0.1058    | 0.3320     |
|     |      | 0.6296      | 0.3661      | 0.004263    | Inf            | Inf            | Inf            | 0.000     | 0.06553   | 0.1560     |
|     |      | 0.6816      | 0.3168      | 0.001597    | Inf            | Inf            | Inf            | 0.000     | 0.04596   | 0.1574     |
|     |      | 0.4906      | 0.4588      | 0.05062     | 22.66          | 21.19          | 2.338          | 0.02119   | 0.001050  | 0.05691    |
| 5   | PH   | 0.5243      | 0.4736      | 0.002090    | 5932.          | 5358.          | 23.64          | 8.838e-05 | 0.7291    | 0.4591     |
|     |      | 0.6179      | 0.3793      | 0.002848    | 201.0          | 123.4          | 0.9263         | 0.003065  | 0.1763    | 0.2481     |
|     |      | 0.7383      | 0.2592      | 0.002564    | 311.3          | 109.3          | 1.081          | 0.002366  | 0.06881   | 0.1240     |
|     |      | 0.3441      | 0.6516      | 0.004280    | 13.28          | 25.14          | 0.1651         | 0.02526   | 0.01939   | 0.1153     |
|     |      | 0.5628      | 0.3600      | 0.07718     | 7.727          | 4.942          | 1.060          | 0.06789   | 0.006392  | 0.05343    |
| 6   | TH   | 0.5313      | 0.4666      | 0.002150    | 1955.          | 1716.          | 7.911          | 0.0002717 | 0.8824    | 0.3782     |
|     |      | 0.6584      | 0.3389      | 0.002680    | Inf            | Inf            | Inf            | 0.000     | 0.05674   | 0.1515     |
|     |      | 0.6632      | 0.3342      | 0.002580    | Inf            | Inf            | Inf            | 0.000     | 0.04456   | 0.1326     |
|     |      | 0.4605      | 0.5368      | 0.002718    | 90.80          | 105.8          | 0.5358         | 0.005046  | 0.01430   | 0.2711     |
|     |      | 0.5502      | 0.4129      | 0.03695     | 244.0          | 183.1          | 16.38          | 0.002250  | 0.001751  | 0.05318    |
|     |      | 0.3934      | 0.5377      | 0.06890     | 9.435          | 12.90          | 1.652          | 0.04003   | 0.0002428 | 0.01339    |
| 6   | PH   | 0.5272      | 0.4707      | 0.002075    | Inf            | Inf            | Inf            | 0.000     | 0.7408    | 0.4040     |
|     |      | 0.6241      | 0.3729      | 0.002956    | 178.1          | 106.4          | 0.8437         | 0.003492  | 0.1588    | 0.2400     |
|     |      | 0.7404      | 0.2571      | 0.002503    | 352.9          | 122.5          | 1.193          | 0.002094  | 0.06523   | 0.1182     |
|     |      | 0.3978      | 0.5994      | 0.002835    | 89.36          | 134.7          | 0.6370         | 0.004431  | 0.02257   | 0.1707     |
|     |      | 0.5514      | 0.3783      | 0.07030     | 6.893          | 4.729          | 0.8789         | 0.07406   | 0.007542  | 0.05246    |
|     |      | 0.2416      | 0.7559      | 0.002574    | 77.09          | 241.2          | 0.8214         | 0.003124  | 0.005075  | 0.01462    |
